# Supplementary material for: Dynamic changes of muscle insulin sensitivity after metabolic surgery
Source: PubMed Central journal article supplement (PMC6744497; doi:10.1038/s41467-019-12081-0), 2019-09-13

## **Supplementary information**

**Gancheva et al. Dynamic changes of muscle insulin sensitivity after metabolic surgery**

**Supplementary table 1.** Top 13 genes with higher expression in skeletal muscle of OB at 2 weeks after metabolic surgery as compared to baseline. Gene names given in italics.

| Gene symbol    | Gene name                                                  | logFold change | P value | Gene function                                                                                                                                                                                                                                                                                                                                                                                                                                                                                                                |
|----------------|------------------------------------------------------------|----------------|---------|------------------------------------------------------------------------------------------------------------------------------------------------------------------------------------------------------------------------------------------------------------------------------------------------------------------------------------------------------------------------------------------------------------------------------------------------------------------------------------------------------------------------------|
| <i>CISH</i>    | cytokine inducible SH2-containing protein                  | 1.36           | 0.048   | SOCS family proteins form part of a classical negative feedback system that regulates cytokine signal transduction. CIS is involved in the negative regulation of cytokines that signal through the JAK-STAT5 pathway such as erythropoietin, prolactin and interleukin 3 (IL3) receptor. Inhibits STAT5 trans-activation by suppressing its tyrosine phosphorylation.                                                                                                                                                       |
| <i>ANGPTL4</i> | angiotensin-like 4                                         | 1.06           | 0.045   | Mediates inactivation of the lipoprotein lipase LPL, and thereby plays a role in the regulation of triglyceride clearance from the blood serum and in lipid metabolism. May also play a role in regulating glucose homeostasis and insulin sensitivity.                                                                                                                                                                                                                                                                      |
| <i>LRRC27</i>  | leucine rich repeat containing 27                          | 0.90           | 0.036   | unknown                                                                                                                                                                                                                                                                                                                                                                                                                                                                                                                      |
| <i>HMGCS2</i>  | 3-hydroxy-3-methylglutaryl-CoA synthase 2                  | 0.84           | 0.003   | Catalyzes the first irreversible step in ketogenesis, condensing acetyl-CoA to acetoacetyl-CoA to form HMG-CoA, which is converted by HMG-CoA reductase (HMGCR) into mevalonate.                                                                                                                                                                                                                                                                                                                                             |
| <i>DNAJC28</i> | DnaJ (Hsp40) homolog subfamily C member 28                 | 0.84           | 0.039   | May have a role in protein folding or as a chaperone.                                                                                                                                                                                                                                                                                                                                                                                                                                                                        |
| <i>HS6ST2</i>  | heparan sulfate 6-O-sulfotransferase 2                     | 0.82           | 0.045   | 6-O-sulfation enzyme which catalyzes the transfer of sulfate from 3'-phosphoadenosine 5'-phosphosulfate (PAPS) to position 6 of the N-sulfoglucosamine residue (GlcNS) of heparan sulfate.                                                                                                                                                                                                                                                                                                                                   |
| <i>CHAC1</i>   | ChaC glutathione-specific gamma-glutamylcyclotransferase 1 | 0.82           | 0.020   | Catalyzes the cleavage of glutathione into 5-oxo-L-proline and a Cys-Gly dipeptide. Acts specifically on glutathione, but not on other gamma-glutamyl peptides. Negative regulator of Notch signaling pathway involved in embryonic neurogenesis: acts by inhibiting Notch cleavage by furin, maintaining Notch in an immature inactive form, thereby promoting neurogenesis in embryos.                                                                                                                                     |
| <i>INHBB</i>   | inhibin beta B                                             | 0.78           | 0.024   | Inhibins and activins inhibit and activate, respectively, the secretion of follitropin by the pituitary gland. Inhibins/activins are involved in regulating a number of diverse functions such as hypothalamic and pituitary hormone secretion, gonadal hormone secretion, germ cell development and maturation, erythroid differentiation, insulin secretion, nerve cell survival, embryonic axial development or bone growth, depending on their subunit composition. Inhibins appear to oppose the functions of activins. |
| <i>ABCG1</i>   | ATP-binding cassette subfamily G member 1                  | 0.76           | 0.002   | Catalyzes the efflux of phospholipids such as sphingomyelin, cholesterol and its oxygenated derivatives like 7beta-hydroxycholesterol and this transport is coupled to hydrolysis of ATP. The lipid efflux is ALB-dependent.                                                                                                                                                                                                                                                                                                 |
| <i>ABCA1</i>   | ATP binding cassette subfamily A member 1                  | 0.74           | 0.006   | Catalyzes the translocation of specific phospholipids from the cytoplasmic to the extracellular/luminal leaflet of membrane coupled to the hydrolysis of ATP. Thereby, participates in phospholipid transfer to apolipoproteins to form nascent high density lipoproteins/HDLs. Transports preferentially phosphatidylcholine over phosphatidylserine. May play a similar role in the efflux of intracellular cholesterol to apolipoproteins and the formation of nascent high density lipoproteins/HDLs.                    |
| <i>AMOTL2</i>  | angiomin like 2                                            | 0.71           | 0.003   | Regulates the translocation of phosphorylated SRC to peripheral cell-matrix adhesion sites. Required for proper architecture of actin filaments. Inhibits the Wnt/beta-catenin signaling pathway, probably by recruiting CTNNB1 to recycling endosomes and hence preventing its translocation to the nucleus. Participates in angiogenesis. May play a role in the polarity, proliferation and migration of endothelial cells. Selectively promotes FGF-induced MAPK activation through SRC.                                 |

|               |                                            |      |       |                                                                                                             |
|---------------|--------------------------------------------|------|-------|-------------------------------------------------------------------------------------------------------------|
| <i>ABCC10</i> | ATP binding cassette subfamily C member 10 | 0.70 | 0.023 | ATP-dependent transporter probably involved in cellular detoxification through lipophilic anion extrusion.  |
| <i>PCDH15</i> | protocadherin-related 15                   | 0.69 | 0.009 | Calcium-dependent cell-adhesion protein. Essential for maintenance of normal retinal and cochlear function. |

**Supplementary table 2.** Top 13 genes with higher expression in skeletal muscle of OB at 52 weeks after bariatric surgery as compared to baseline. Gene names given in italics.

| Gene symbol    | Gene name                                         | logFold change | P value | Gene function                                                                                                                                                                                                                                                                                                                                                      |
|----------------|---------------------------------------------------|----------------|---------|--------------------------------------------------------------------------------------------------------------------------------------------------------------------------------------------------------------------------------------------------------------------------------------------------------------------------------------------------------------------|
| <i>BEX2</i>    | brain expressed X-linked 2                        | 2.39           | 0.024   | Regulator of mitochondrial apoptosis and G1 cell cycle in breast cancer. Protects the breast cancer cells against mitochondrial apoptosis and this effect is mediated through the modulation of BCL2 protein family, which involves the positive regulation of anti-apoptotic member BCL2 and the negative regulation of pro-apoptotic members BAD, BAK1 and PUMA. |
| <i>NNMT</i>    | nicotinamide N-methyltransferase                  | 1.96           | 0.007   | Catalyzes the N-methylation of nicotinamide and other pyridines to form pyridinium ions. This activity is important for biotransformation of many drugs and xenobiotic compounds.                                                                                                                                                                                  |
| <i>LAD1</i>    | laminin 1                                         | 1.56           | 0.009   | Anchoring filament protein which is a component of the basement membrane zone.                                                                                                                                                                                                                                                                                     |
| <i>MYH3</i>    | myosin, heavy chain 3, skeletal muscle, embryonic | 1.47           | 0.033   | Muscle contraction.                                                                                                                                                                                                                                                                                                                                                |
| <i>FST</i>     | follicle stimulating hormone receptor type 1      | 1.19           | 0.031   | Binds directly to activin and functions as an activin antagonist. Specific inhibitor of the biosynthesis and secretion of pituitary follicle stimulating hormone (FSH).                                                                                                                                                                                            |
| <i>ACTC1</i>   | actin, alpha, cardiac muscle 1                    | 1.18           | 0.036   | Actins are highly conserved proteins that are involved in various types of cell motility and are ubiquitously expressed in all eukaryotic cells.                                                                                                                                                                                                                   |
| <i>CHRNA1</i>  | cholinergic receptor, nicotinic, alpha 1 (muscle) | 1.17           | 0.047   | After binding acetylcholine, the AChR responds by an extensive change in conformation that affects all subunits and leads to opening of an ion-conducting channel across the plasma membrane.                                                                                                                                                                      |
| <i>EFCAB7</i>  | EF-hand calcium binding domain 7                  | 1.05           | 0.049   | Component of the Evc complex that positively regulates ciliary Hedgehog (Hh) signaling. Required for the localization of the EVC2:EVC subcomplex at the base of primary cilia.                                                                                                                                                                                     |
| <i>ARMCX4</i>  | armadillo repeat containing, X-linked 4           | 0.95           | 0.004   | unknown                                                                                                                                                                                                                                                                                                                                                            |
| <i>PCDH15</i>  | protocadherin-related 15                          | 0.89           | 0.022   | Calcium-dependent cell-adhesion protein. Essential for maintenance of normal retinal and cochlear function.                                                                                                                                                                                                                                                        |
| <i>CCDC8</i>   | coiled-coil domain containing 8                   | 0.85           | 0.038   | Core component of the 3M complex, a complex required to regulate microtubule dynamics and genome integrity. It is unclear how the 3M complex regulates microtubules, it could act by controlling the level of a microtubule stabilizer (PubMed:24793695, PubMed:24793696). Required for localization of CUL7 to the centrosome (PubMed:24793695).                  |
| <i>ST8SIA1</i> | ST8 alpha-N-acetylneuraminidase 1                 | 0.82           | 0.013   | Involved in the production of gangliosides GD3 and GT3 from GM3; gangliosides are a subfamily of complex glycosphingolipids that contain one or more residues of sialic acid.                                                                                                                                                                                      |
| <i>SMAD9</i>   | SMAD family member 9                              | 0.81           | 0.033   | Transcriptional modulator activated by BMP (bone morphogenetic proteins) type 1 receptor kinase. SMAD9 is a receptor-regulated SMAD (R-SMAD).                                                                                                                                                                                                                      |

Supplementary table 3. Gene ontology analysis of differentially expressed genes: CON vs OB (Ow). The Go-terms colored in green are depicted in the go plot in fig.3b . Gene names given in italics.

| GO-term    | Pathway                                                                      | Gene symbol                                                                                                                                                                                                                                                                                                                                                                                                                       | Number of genes / total number of genes in pathway | Fold enrichment | P-value  |
|------------|------------------------------------------------------------------------------|-----------------------------------------------------------------------------------------------------------------------------------------------------------------------------------------------------------------------------------------------------------------------------------------------------------------------------------------------------------------------------------------------------------------------------------|----------------------------------------------------|-----------------|----------|
| GO:0015671 | oxygen transport                                                             | <i>HBM, HBG2, HBG1, HBB, HBA2, HBD</i>                                                                                                                                                                                                                                                                                                                                                                                            | 6 / 15                                             | 14.4            | 3.88E-05 |
| GO:0007165 | signal transduction                                                          | <i>CALCOCO1, CXCL9, SLC44A2, PIK3CD, SECTM1, TNFSF13B, RASSF3, IMPA2, RASSF6, CASP1, NCK2, PRKACB, CD53, IL4R, RPK3, IGF1BP3, SP110, TRAF1, ITPKB, TYROBP, TNFRSF25, LTB, S100A9, CSF2RB, PIK3R1, IL2RG, RASGRP2, RASGRP1, LILRA3, FYB, PDE11A, SH3BP1, INPP5D, SPOCK2, SH3BP2, CXCR2, PTK2B, APBB1, PAK1, ASIC1, LYN, CCN3, TYMRD1, TNFRSF10C, WWP1, TNFRSF10B, IGF1, ARHGAP27, NR2F2, ARHGAP25, SORL1, RCAN1, ARHGAP30, LTR</i> | 54 / 1161                                          | 1.7             | 2.52E-04 |
| GO:0042981 | regulation of apoptotic process                                              | <i>BNIP3L, IGF1BP3, LRP5, TNFRSF10C, TNFRSF10B, BMP5, RASSF3, RASSF5, PEA15, RASSF6, CARD17, CASP1, GAS1, TNFRSF25, CARD16, BIRC3, BCL2L1</i>                                                                                                                                                                                                                                                                                     | 17 / 213                                           | 2.9             | 3.17E-04 |
| GO:0006955 | immune response                                                              | <i>IL1RN, CXCL9, LST1, SECTM1, IL2RG, FYB, TNFSF13B, ICOS, S1PR4, MAP4K2, HLA-H, CCL23, IL4R, SEMA4D, IL18, TNFRSF10C, TNFRSF10B, IL16, HLA-A, HLA-F, VAV1, TGFB3, CD27, TNFRSF25, LTB, LTR</i>                                                                                                                                                                                                                                   | 26 / 421                                           | 2.2             | 3.26E-04 |
| GO:0031032 | actomyosin structure organization                                            | <i>CNN2, MYLIP, EPB41, EPB41L2, MYH9, LURAP1</i>                                                                                                                                                                                                                                                                                                                                                                                  | 6 / 27                                             | 8.0             | 7.92E-04 |
| GO:0043410 | positive regulation of MAPK cascade                                          | <i>BANK1, IGF1BP3, LPAR1, CD27, TNFRSF25, IGF1, ZNF622, IL6R, SORBS3</i>                                                                                                                                                                                                                                                                                                                                                          | 9 / 81                                             | 4.0             | 1.84E-03 |
| GO:0001771 | immunological synapse formation                                              | <i>DOCK8, NCK2, DOCK2, CORO1A</i>                                                                                                                                                                                                                                                                                                                                                                                                 | 4 / 10                                             | 14.4            | 2.22E-03 |
| GO:0006954 | inflammatory response                                                        | <i>LYN, CCL23, SP100, CXCL9, ITGB2, IL18, TNFRSF10C, CXCR4, PIK3CD, TNFRSF10B, NMI, NFKB2, CXCR1, CLEC7A, CXCR2, S100A12, CD27, CH3L1, TNFRSF25, LGALS9, S100A9, S100A8</i>                                                                                                                                                                                                                                                       | 22 / 379                                           | 2.1             | 2.25E-03 |
| GO:0030593 | neutrophil chemotaxis                                                        | <i>CCL23, ITGB2, CXCR2, S100A12, PIK3CD, S100A9, VAV1, S100A8</i>                                                                                                                                                                                                                                                                                                                                                                 | 8 / 66                                             | 4.3             | 2.33E-03 |
| GO:0043547 | positive regulation of GTPase activity                                       | <i>DOCK4, TRIO, RGS19, DOCK8, CSF2RB, IL2RG, RASGRP2, RASGRP1, RCBT2B, RGS2, RGS3, SH3BP1, ARHGAP25, VAV1, ARHGAP27, GMIP, ARHGAP25, VAV1, ARHGAP30, CDC42EP5, ARHGAP2, DOCK2</i>                                                                                                                                                                                                                                                 | 29 / 565                                           | 1.8             | 2.42E-03 |
| GO:0050729 | positive regulation of inflammatory response                                 | <i>CCL23, IL18, AGTR1, LPL, S100A12, ZP3, S100A9, S100A8</i>                                                                                                                                                                                                                                                                                                                                                                      | 8 / 73                                             | 3.9             | 4.12E-03 |
| GO:0045087 | innate immune response                                                       | <i>LYN, MAP4K2, NCF2, NLRCS, PIK3CD, ZC3HAV1, CORO1A, SIRT2, NFKB2, RNF135, FGR, TYROBP, CLEC7A, ELF4, LCN2, SERPING1, PTK2B, S100A12, CSK, ANG, ARHGAP2, S100A9, S100A8</i>                                                                                                                                                                                                                                                      | 23 / 430                                           | 1.9             | 4.66E-03 |
| GO:0045088 | regulation of innate immune response                                         | <i>RNF135, FGR, IRF1, BIRC3</i>                                                                                                                                                                                                                                                                                                                                                                                                   | 4 / 13                                             | 11.0            | 4.96E-03 |
| GO:0043123 | positive regulation of I-kappaB kinase/NF-kappaB signaling                   | <i>PINK1, SLC44A2, TSPAN6, CASP1, LPAR1, S100A12, TNFRSF10B, SECTM1, ZC3HAV1, LGALS9, LURAP1, BIRC3</i>                                                                                                                                                                                                                                                                                                                           | 12 / 161                                           | 2.7             | 5.44E-03 |
| GO:0008360 | regulation of cell shape                                                     | <i>FGR, SEMA4D, CDC42EP5, LST1, PALM, ITGB2, LPAR1, MYH9, PTK2B, CORO1A, MYL12A</i>                                                                                                                                                                                                                                                                                                                                               | 11 / 140                                           | 2.8             | 5.79E-03 |
| GO:0006334 | rucleosome assembly                                                          | <i>HIST1H2BM, HIST1H2BO, HIST1H2BI, HIST1H2BF, HIST1H2BD, HIST1H2BB, HIST1H2BD, HIST1H3D, HIST1H3E, HIST1H2BC</i>                                                                                                                                                                                                                                                                                                                 | 10 / 119                                           | 3.0             | 6.01E-03 |
| GO:0032496 | response to lipopolysaccharide                                               | <i>CXCL9, CASP1, TNFRSF10C, TNFRSF10B, CD27, TNFRSF25, CSF2RB, LGALS9, S100A8, TIMP4, NFKB2, SNCA</i>                                                                                                                                                                                                                                                                                                                             | 12 / 164                                           | 2.6             | 6.23E-03 |
| GO:0019731 | antibacterial humoral response                                               | <i>HIST1H2BI, HIST1H2BF, ANG, HLA-A, HIST1H2BD, HIST1H2BC</i>                                                                                                                                                                                                                                                                                                                                                                     | 6 / 44                                             | 4.9             | 7.24E-03 |
| GO:0060337 | type I interferon signaling pathway                                          | <i>ISG20, HLA-H, SP100, IFITM1, IRF1, HLA-A, HLA-F</i>                                                                                                                                                                                                                                                                                                                                                                            | 7 / 64                                             | 3.9             | 8.61E-03 |
| GO:0050830 | defense response to Gram-positive bacterium                                  | <i>FGR, HIST1H2BI, HIST1H2BF, ANG, HLA-A, IL6R, HIST1H2BD, HIST1H2BC</i>                                                                                                                                                                                                                                                                                                                                                          | 8 / 85                                             | 3.4             | 9.42E-03 |
| GO:0007155 | cell adhesion                                                                | <i>DDR1, NLGN4Y, MYBPC2, SEMA4D, ITGB2, LAMB1, EMP2, SPG7, PCDH18, SORBS3, MAG, ARVCF, ISLR, SELL, COL6A2, NIN1, SSPN, COL6A3, ITGB1, ACKR3, ITGB7, PLXNC1, MPZL3</i>                                                                                                                                                                                                                                                             | 23 / 459                                           | 1.8             | 9.72E-03 |
| GO:0051092 | positive regulation of NF-kappaB transcription factor activity               | <i>RIPK3, ITGB2, S100A12, TRAF1, LGALS9, ARHGAP2, RAB7B, S100A9, S100A8, NFKB2</i>                                                                                                                                                                                                                                                                                                                                                | 10 / 133                                           | 2.7             | 1.21E-02 |
| GO:0006796 | phosphate-containing compound metabolic process                              | <i>PTPRD, IMPA2, INPP5D, LHPH</i>                                                                                                                                                                                                                                                                                                                                                                                                 | 4 / 18                                             | 8.0             | 1.28E-02 |
| GO:0060333 | interferon-gamma-mediated signaling pathway                                  | <i>HLA-H, SP100, IRF1, HLA-A, NMI, IFI30, HLA-F</i>                                                                                                                                                                                                                                                                                                                                                                               | 7 / 71                                             | 3.5             | 1.40E-02 |
| GO:0070098 | chemokine-mediated signaling pathway                                         | <i>CCL23, CXCL9, CXCR1, CXCR2, PTK2B, CXCR4, ACKR3</i>                                                                                                                                                                                                                                                                                                                                                                            | 7 / 71                                             | 3.5             | 1.40E-02 |
| GO:0030335 | positive regulation of cell migration                                        | <i>LYN, FGR, PAK1, SEMA4D, SEMA3B, GCNT2, PTK2B, PIK3CD, LAMB1, IGF1, PIK3R1, CORO1A</i>                                                                                                                                                                                                                                                                                                                                          | 12 / 184                                           | 2.3             | 1.41E-02 |
| GO:0042127 | regulation of cell proliferation                                             | <i>CNN2, FGR, CXCL9, IL4R, AGTR1, TNFRSF10C, PTK2B, TNFRSF10B, CD27, CSK, TNFRSF25, ARHGAP2</i>                                                                                                                                                                                                                                                                                                                                   | 12 / 185                                           | 2.3             | 1.46E-02 |
| GO:0001867 | complement activation, lectin pathway                                        | <i>FCN1, KRT1, MASP1</i>                                                                                                                                                                                                                                                                                                                                                                                                          | 3 / 7                                              | 15.4            | 1.48E-02 |
| GO:0044267 | cellular protein metabolic process                                           | <i>IGFBP5, MMP2, IGF1BP3, CSF2RB, IGF1, LMCD1, HIST1H3D, HIST1H3E, SNCA</i>                                                                                                                                                                                                                                                                                                                                                       | 9 / 118                                            | 2.7             | 1.73E-02 |
| GO:0035556 | intracellular signal transduction                                            | <i>MAP4K2, IGF1BP5, WSB2, MAST3, DGKA, ACOT11, GMP, FYB, SOCS2, TGFB3, PINK1, TYROBP, NUAQ2, RASSF5, INPP5D, ARHGAP2, ZP3, PLCD4, TNS2, PAG1</i>                                                                                                                                                                                                                                                                                  | 20 / 403                                           | 1.9             | 1.83E-02 |
| GO:0007229 | integrin-mediated signaling pathway                                          | <i>FGR, TYROBP, ITGB2, MYH9, PTK2B, ITGB1, ITGB7, VAV1</i>                                                                                                                                                                                                                                                                                                                                                                        | 8 / 99                                             | 2.8             | 2.05E-02 |
| GO:0050900 | leukocyte migration                                                          | <i>LYN, MAG, SLC7A7, SELL, INPP5D, ITGB2, MYH9, PIK3R1, MMP9</i>                                                                                                                                                                                                                                                                                                                                                                  | 9 / 122                                            | 2.6             | 2.07E-02 |
| GO:0031295 | T cell costimulation                                                         | <i>LYN, PAK1, CSK, PIK3R1, ICOS, VAV1, TNFSF13B</i>                                                                                                                                                                                                                                                                                                                                                                               | 7 / 78                                             | 3.2             | 2.14E-02 |
| GO:0007166 | cell surface receptor signaling pathway                                      | <i>CD53, IFITM1, TNFRSF10B, ITPKB, TSPAN15, PTPRC, CXCR1, TSPAN6, P2RY1, CXCR2, PTK2B, CD27, TNFRSF25, ILTR, BIRC3</i>                                                                                                                                                                                                                                                                                                            | 15 / 274                                           | 2.0             | 2.17E-02 |
| GO:0070207 | protein homotrimerization                                                    | <i>MLKL, ALOX5AP, LCN2, ASIC1</i>                                                                                                                                                                                                                                                                                                                                                                                                 | 4 / 22                                             | 6.5             | 2.22E-02 |
| GO:0001666 | response to hypoxia                                                          | <i>TGFB3, PAK1, ALAS2, MMP2, UCP2, CASP1, PTK2B, SCAP, CXCR4, ANG, PPARA</i>                                                                                                                                                                                                                                                                                                                                                      | 11 / 172                                           | 2.3             | 2.22E-02 |
| GO:0001558 | regulation of cell growth                                                    | <i>SOCS2, DDR1, IGF1BP5, IGF1BP3, HTRA3, AGTR1, RASGRP2</i>                                                                                                                                                                                                                                                                                                                                                                       | 7 / 80                                             | 3.1             | 2.39E-02 |
| GO:0002480 | loading and presentation of exogenous peptide antigen via MHC class I T      | <i>HLA-H, HLA-A, HLA-F</i>                                                                                                                                                                                                                                                                                                                                                                                                        | 3 / 9                                              | 12.0            | 2.44E-02 |
| GO:0044342 | type B pancreatic cell proliferation                                         | <i>IGFBP5, IGF1BP3, SIRT2</i>                                                                                                                                                                                                                                                                                                                                                                                                     | 3 / 9                                              | 12.0            | 2.44E-02 |
| GO:0030653 | peptidyltyrosine autophosphorylation                                         | <i>LYN, FGR, DDR1, PTK2B, CSK</i>                                                                                                                                                                                                                                                                                                                                                                                                 | 5 / 40                                             | 4.5             | 2.45E-02 |
| GO:0009967 | positive regulation of signal transduction                                   | <i>SOCS2, HOMER1, SH3BP2, SLA, GRAP, PAG1</i>                                                                                                                                                                                                                                                                                                                                                                                     | 6 / 61                                             | 3.5             | 2.71E-02 |
| GO:0006968 | cellular defense response                                                    | <i>CXCL9, TYROBP, NCF2, CXCR2, PTK2B, TIRG1</i>                                                                                                                                                                                                                                                                                                                                                                                   | 6 / 62                                             | 3.5             | 2.88E-02 |
| GO:0051897 | positive regulation of protein kinase B signaling                            | <i>PINK1, IGF1BP5, AKR1C3, IL18, GCNT2, CH3L1, ZP3</i>                                                                                                                                                                                                                                                                                                                                                                            | 7 / 84                                             | 3.0             | 2.95E-02 |
| GO:0043534 | blood vessel endothelial cell migration                                      | <i>MYH9, PTK2B, EMP2</i>                                                                                                                                                                                                                                                                                                                                                                                                          | 3 / 10                                             | 10.8            | 3.00E-02 |
| GO:0006468 | protein phosphorylation                                                      | <i>LYN, MAP4K2, TRIO, MLKL, IGF1BP3, PIK3CD, PIK3R1, RUVK3, PHKA2, FYB, ERN1, FGR, PAK1, PINK1, NUAQ2, AAK1, PTK2B, CSK, ALPK1, HCST, PRKACB</i>                                                                                                                                                                                                                                                                                  | 21 / 456                                           | 1.7             | 3.10E-02 |
| GO:0031623 | receptor internalization                                                     | <i>CXCR1, ITGB2, CXCR2, ACKR3, SNCA</i>                                                                                                                                                                                                                                                                                                                                                                                           | 5 / 43                                             | 4.2             | 3.10E-02 |
| GO:0001816 | cytokine production                                                          | <i>PIK3CD, S100A9, RASGRP1, S100A8</i>                                                                                                                                                                                                                                                                                                                                                                                            | 4 / 25                                             | 5.7             | 3.12E-02 |
| GO:0002227 | innate immune response in mucosa                                             | <i>HIST1H2BI, HIST1H2BF, HIST1H2BD, HIST1H2BC</i>                                                                                                                                                                                                                                                                                                                                                                                 | 4 / 25                                             | 5.7             | 3.12E-02 |
| GO:0048013 | ephrin receptor signaling pathway                                            | <i>LYN, ACTR2, PAK1, MMP2, NCK2, MMP9, MYL12A</i>                                                                                                                                                                                                                                                                                                                                                                                 | 7 / 86                                             | 2.9             | 3.26E-02 |
| GO:0007596 | blood coagulation                                                            | <i>LYN, NFE2, HBG2, HBG1, DOCK8, IRF1, HBB, HBD, PRKACB, HIST1H3D, HIST1H3E</i>                                                                                                                                                                                                                                                                                                                                                   | 11 / 184                                           | 2.1             | 3.33E-02 |
| GO:0007204 | positive regulation of cytosolic calcium ion concentration                   | <i>CDS2, P2RY1, CXCR2, AGTR1, LPAR1, PTK2B, CXCR4, ADRA1D, S1PR4</i>                                                                                                                                                                                                                                                                                                                                                              | 9 / 134                                            | 2.4             | 3.37E-02 |
| GO:0032148 | activation of protein kinase B activity                                      | <i>PINK1, IL18, ANG, IGF1</i>                                                                                                                                                                                                                                                                                                                                                                                                     | 4 / 26                                             | 5.5             | 3.46E-02 |
| GO:0072661 | protein targeting to plasma membrane                                         | <i>TESC, PITCH1, PALM, MYL12A</i>                                                                                                                                                                                                                                                                                                                                                                                                 | 4 / 26                                             | 5.5             | 3.46E-02 |
| GO:0002523 | leukocyte migration involved in inflammatory response                        | <i>ITGB2, S100A9, S100A8</i>                                                                                                                                                                                                                                                                                                                                                                                                      | 3 / 11                                             | 9.8             | 3.60E-02 |
| GO:0051279 | regulation of release of sequestered calcium ion into cytosol                | <i>LYN, PTK2B, CORO1A</i>                                                                                                                                                                                                                                                                                                                                                                                                         | 3 / 11                                             | 9.8             | 3.60E-02 |
| GO:0016064 | immunoglobulin mediated immune response                                      | <i>IL4R, INPP5D, CD27</i>                                                                                                                                                                                                                                                                                                                                                                                                         | 3 / 11                                             | 9.8             | 3.60E-02 |
| GO:0014065 | phosphatidylinositol 3-kinase signaling                                      | <i>PIK3CD, IGF1, PIK3R1, SIRT2</i>                                                                                                                                                                                                                                                                                                                                                                                                | 4 / 27                                             | 5.3             | 3.81E-02 |
| GO:0050832 | defense response to fungus                                                   | <i>COTL1, S100A12, S100A9, S100A8</i>                                                                                                                                                                                                                                                                                                                                                                                             | 4 / 27                                             | 5.3             | 3.81E-02 |
| GO:0035987 | endothelial cell differentiation                                             | <i>MMP2, ITGB2, LAMB1, MMP9</i>                                                                                                                                                                                                                                                                                                                                                                                                   | 4 / 27                                             | 5.3             | 3.81E-02 |
| GO:0007050 | cell cycle arrest                                                            | <i>ERN1, CDKN2C, PCBP4, IRF1, GAS1, APBB1, VASH1, MLF1, UHMK1</i>                                                                                                                                                                                                                                                                                                                                                                 | 9 / 141                                            | 2.3             | 4.35E-02 |
| GO:0010942 | positive regulation of cell death                                            | <i>UCP2, AKR1C3, HBB, HBA2</i>                                                                                                                                                                                                                                                                                                                                                                                                    | 4 / 29                                             | 4.9             | 4.58E-02 |
| GO:0033209 | tumor necrosis factor-mediated signaling pathway                             | <i>TNFRSF10C, PTK2B, TNFRSF10B, CD27, TNFRSF25, LTB, TNFSF13B, BIRC3</i>                                                                                                                                                                                                                                                                                                                                                          | 8 / 118                                            | 2.4             | 4.67E-02 |
| GO:0030198 | extracellular matrix organization                                            | <i>DDR1, COL6A2, SPOCK2, ITGB2, COL6A3, LAMB1, ITGB7, HSD17B12, OLFML2A, MPZL3, NFKB2</i>                                                                                                                                                                                                                                                                                                                                         | 11 / 196                                           | 2.0             | 4.80E-02 |
| GO:0043568 | positive regulation of insulin-like growth factor receptor signaling pathway | <i>IGFBP5, IGF1BP3, IGF1</i>                                                                                                                                                                                                                                                                                                                                                                                                      | 3 / 13                                             | 8.3             | 4.92E-02 |
| GO:0002474 | antigen processing and presentation of peptide antigen via MHC class         | <i>HLA-H, SART1B, HLA-A, HLA-F</i>                                                                                                                                                                                                                                                                                                                                                                                                | 4 / 30                                             | 4.8             | 4.98E-02 |
| GO:0002917 | T cell differentiation                                                       | <i>PTPRC, PIK3CD, IL7B, VAV1</i>                                                                                                                                                                                                                                                                                                                                                                                                  | 4 / 30                                             | 4.8             | 4.98E-02 |
| GO:0046777 | protein autophosphorylation                                                  | <i>ERN1, LYN, FGR, DDR1, PAK1, RPK3, AAK1, PTK2B, CSK, UHMK1</i>                                                                                                                                                                                                                                                                                                                                                                  | 10 / 172                                           | 2.1             | 5.14E-02 |
| GO:0045765 | regulation of angiogenesis                                                   | <i>SP100, KRT1, PTK2B, EMP2</i>                                                                                                                                                                                                                                                                                                                                                                                                   | 4 / 31                                             | 4.6             | 5.41E-02 |
| GO:0006935 | chemotaxis                                                                   | <i>CCL23, CXCL9, CXCR1, CXCR2, CXCR4, ACKR3, LGALS9, DOCK2</i>                                                                                                                                                                                                                                                                                                                                                                    | 8 / 122                                            | 2.4             | 5.41E-02 |
| GO:0032796 | uropod organization                                                          | <i>MYH9, CORO1A</i>                                                                                                                                                                                                                                                                                                                                                                                                               | 2 / 2                                              | 35.9            | 5.48E-02 |
| GO:0070488 | neutrophil aggregation                                                       | <i>S100A9, S100A8</i>                                                                                                                                                                                                                                                                                                                                                                                                             | 2 / 2                                              | 35.9            | 5.48E-02 |
| GO:1903919 | negative regulation of actin filament covering                               | <i>CSRFP3, MYH9</i>                                                                                                                                                                                                                                                                                                                                                                                                               | 2 / 2                                              | 35.9            | 5.48E-02 |
| GO:0038111 | interleukin-7-mediated signaling pathway                                     | <i>IL7R, IL2RG</i>                                                                                                                                                                                                                                                                                                                                                                                                                | 2 / 2                                              | 35.9            | 5.48E-02 |
| GO:0038112 | interleukin-8-mediated signaling pathway                                     | <i>CXCR1, CXCR2</i>                                                                                                                                                                                                                                                                                                                                                                                                               | 2 / 2                                              | 35.9            | 5.48E-02 |
| GO:0033030 | negative regulation of neutrophil apoptotic process                          | <i>ITPKB, CXCR2</i>                                                                                                                                                                                                                                                                                                                                                                                                               | 2 / 2                                              | 35.9            | 5.48E-02 |
| GO:0070374 | positive regulation of ERK1 and ERK2 cascade                                 | <i>CCL23, P2RY1, FFR4, GCNT2, PTK2B, CH3L1, ACKR3, ABCA7, LGALS9, RASGRP1</i>                                                                                                                                                                                                                                                                                                                                                     | 10 / 175                                           | 2.1             | 5.61E-02 |
| GO:0034097 | response to cytokine                                                         | <i>SP100, IL6R, TIMP4, BCL2L1, NFKB2</i>                                                                                                                                                                                                                                                                                                                                                                                          | 5 / 52                                             | 3.5             | 5.62E-02 |
| GO:0050776 | regulation of immune response                                                | <i>HLA-H, IFITM1, TYROBP, SELL, IRF1, ITGB2, ITGB7, HLA-A, HLA-F, HCST</i>                                                                                                                                                                                                                                                                                                                                                        | 10 / 178                                           | 2.0             | 6.12E-02 |
| GO:2001244 | positive regulation of intrinsic apoptotic signaling pathway                 | <i>RIPK3, S100A9, S100A8, BCL2L1</i>                                                                                                                                                                                                                                                                                                                                                                                              | 4 / 33                                             | 4.3             | 6.30E-02 |
| GO:1902042 | regulation of extrinsic apoptotic signaling pathway via death domain r       | <i>PEA15, TNFRSF10B, ARHGAP2, BMP5</i>                                                                                                                                                                                                                                                                                                                                                                                            | 4 / 33                                             | 4.3             | 6.30E-02 |
| GO:0051604 | protein maturation                                                           | <i>TSPAN15, TESC, SORL1</i>                                                                                                                                                                                                                                                                                                                                                                                                       | 3 / 15                                             | 7.2             | 6.38E-02 |
| GO:1904707 | positive regulation of vascular smooth muscle cell proliferation             | <i>ERN1, MMP2, MMP9</i>                                                                                                                                                                                                                                                                                                                                                                                                           | 3 / 15                                             | 7.2             | 6.38E-02 |
| GO:0045947 | negative regulation of transcription initiation                              | <i>BANK1, EPHA2, EPHA2BP3</i>                                                                                                                                                                                                                                                                                                                                                                                                     | 3 / 15                                             | 7.2             | 6.38E-02 |
| GO:0007173 | epidermal growth factor receptor signaling pathway                           | <i>NCK2, PTK2B, CSK, PIK3R1, PAG1</i>                                                                                                                                                                                                                                                                                                                                                                                             | 5 / 56                                             | 3.2             | 7.00E-02 |
| GO:0010744 | positive regulation of macrophage derived foam cell differentiation          | <i>IL18, AGTR1, LPL</i>                                                                                                                                                                                                                                                                                                                                                                                                           | 3 / 16                                             | 6.7             | 7.16E-02 |
| GO:0001503 | osteification                                                                | <i>CLEC3B, IFITM1, RUVK3, MMP9, PDLIM7, BMP5</i>                                                                                                                                                                                                                                                                                                                                                                                  | 6 / 80                                             | 2.7             | 7.20E-02 |
| GO:0006865 | amino acid transport                                                         | <i>SLC7A2, SLC4A2, SLC16A10, SLC28A4</i>                                                                                                                                                                                                                                                                                                                                                                                          | 4 / 35                                             | 4.1             | 7.27E-02 |
| GO:0050714 | positive regulation of protein secretion                                     | <i>ANG, APBB1, IGF1, KCNN4</i>                                                                                                                                                                                                                                                                                                                                                                                                    | 4 / 36                                             | 4.0             | 7.77E-02 |
| GO:0009409 | response to cold                                                             | <i>PLAC8, ACOT11, COX2, LPL</i>                                                                                                                                                                                                                                                                                                                                                                                                   | 4 / 36                                             | 4.0             | 7.77E-02 |
| GO:0050731 | positive regulation of peptidyl-tyrosine phosphorylation                     | <i>SEMA4D, PTK2B, IGF1, ARHGAP2, PLPPP3, IL6R</i>                                                                                                                                                                                                                                                                                                                                                                                 | 6 / 82                                             | 2.6             | 7.82E-02 |
| GO:0048535 | lymph node development                                                       | <i>RPK3, IL7B, ILTR</i>                                                                                                                                                                                                                                                                                                                                                                                                           | 3 / 17                                             | 6.3             | 7.97E-02 |
| GO:0002407 | dendritic cell chemotaxis                                                    | <i>CXCR1, CXCR2, CXCR4</i>                                                                                                                                                                                                                                                                                                                                                                                                        | 3 / 17                                             | 6.3             | 7.97E-02 |
| GO:1901741 | positive regulation of myoblast fusion                                       | <i>CD53, CXCL9, IL4R</i>                                                                                                                                                                                                                                                                                                                                                                                                          | 3 / 17                                             | 6.3             | 7.97E-02 |

|            |                                                                              |                                                                                                               |          |      |          |
|------------|------------------------------------------------------------------------------|---------------------------------------------------------------------------------------------------------------|----------|------|----------|
| GO:0051056 | regulation of small GTPase mediated signal transduction                      | RAP1GAP2, ARHGAP30, TRIO, ARHGDI1B, ARHGEF2, GMP, ARHGAP25, VAV1                                              | 8 / 134  | 2.1  | 8.05E-02 |
| GO:1903298 | negative regulation of hypoxia-induced intrinsic apoptotic signaling pathway | PINK1, TM6IM6                                                                                                 | 2 / 3    | 23.9 | 8.11E-02 |
| GO:2000670 | positive regulation of dendritic cell apoptotic process                      | LYN, LGALS9                                                                                                   | 2 / 3    | 23.9 | 8.11E-02 |
| GO:0032602 | chemokine production                                                         | S100A9, S100A8                                                                                                | 2 / 3    | 23.9 | 8.11E-02 |
| GO:1903204 | negative regulation of oxidative stress-induced neuron death                 | PINK1, FBXO7                                                                                                  | 2 / 3    | 23.9 | 8.11E-02 |
| GO:0009612 | response to mechanical stimulus                                              | RCAN1, PTC1, P2RY1, PTK2B, CH3L1                                                                              | 5 / 59   | 3.0  | 8.14E-02 |
| GO:0042102 | positive regulation of T cell proliferation                                  | PTPRC, NCK2, ZP3, CORO1A, TNFSF13B                                                                            | 5 / 60   | 3.0  | 8.54E-02 |
| GO:0001556 | oocyte maturation                                                            | PTK2B, ANG, PABPC1L                                                                                           | 3 / 18   | 6.0  | 8.81E-02 |
| GO:0010596 | negative regulation of endothelial cell migration                            | SP100, NRP2, VASH1                                                                                            | 3 / 18   | 6.0  | 8.81E-02 |
| GO:0002990 | positive regulation of leukocyte chemotaxis                                  | CXCL9, IL6R, GPM33                                                                                            | 3 / 18   | 6.0  | 8.81E-02 |
| GO:0008625 | extrinsic apoptotic signaling pathway via death domain receptors             | TNFRSF10C, TNFRSF10B, CD27, PIK3R1                                                                            | 4 / 38   | 3.8  | 8.82E-02 |
| GO:0008285 | negative regulation of cell proliferation                                    | LYN, DDR1, CCL23, IFITM1, CDKN2C, TESC, IGFBP3, SIRT2, BMP5, RASSF5, IRF1, MX1, NCK2, PTK2B, CSK, FEZF2, TNS2 | 17 / 396 | 1.5  | 8.96E-02 |
| GO:0051607 | defense response to virus                                                    | ISG20, BNP3L, EXOSC5, IFITM1, CXCL9, PTPRC, IRF1, NLRC5, ZC3HAV1                                              | 9 / 165  | 2.0  | 9.01E-02 |
| GO:0007568 | aging                                                                        | IGFBP5, P2RY1, UCP2, ITGB2, SERPING1, SCAP, EEF2, NFKB2, SNCA                                                 | 9 / 165  | 2.0  | 9.01E-02 |
| GO:0006928 | movement of cell or subcellular component                                    | ACTR2, MYLIP, PALM, ARHGDI1B, IGF1, CORO1A                                                                    | 6 / 86   | 2.5  | 9.15E-02 |
| GO:0045668 | negative regulation of osteoblast differentiation                            | IGFBP5, SEMA4D, PTC1, LRP5                                                                                    | 4 / 39   | 3.7  | 9.37E-02 |
| GO:0046579 | positive regulation of Ras protein signal transduction                       | ITPKB, IGF1, RASGRP1                                                                                          | 3 / 19   | 5.7  | 9.67E-02 |
| GO:0008589 | regulation of smoothened signaling pathway                                   | PTCH1, TC11, GAS1                                                                                             | 3 / 19   | 5.7  | 9.67E-02 |

**Supplementary table 4.** Gene ontology analysis of differentially expressed genes: OB (0w) vs OB (2w). The GO-terms colored in green are depicted in the go plot in fig.3c. Gene names given in *italics*.

| GO-term    | Pathway                                                                         | Gene symbol                                                                                                                                                                                                                                                                                                                                                                                                                                                                                                                                                                                                                                                                                                                                                                                                                                                                                                                                                                                                                                                                                                   | Number of genes / total number of genes in pathway | Fold enrichment | P-value  |
|------------|---------------------------------------------------------------------------------|---------------------------------------------------------------------------------------------------------------------------------------------------------------------------------------------------------------------------------------------------------------------------------------------------------------------------------------------------------------------------------------------------------------------------------------------------------------------------------------------------------------------------------------------------------------------------------------------------------------------------------------------------------------------------------------------------------------------------------------------------------------------------------------------------------------------------------------------------------------------------------------------------------------------------------------------------------------------------------------------------------------------------------------------------------------------------------------------------------------|----------------------------------------------------|-----------------|----------|
| GO:0003398 | mRNA splicing, via spliceosome                                                  | <i>SF3B3, CSTF7, SRRRT, EIF4A3, PPWD1, WDR83, ELAVL1, U2AF1L4, SYNCRIP, METTL14, SART3, RAVER1, TRA2B, CWC22, PAPOLA, TXNL4A, HNRNP1A, NCBP1, UPF3B, PRPF40B, GTF2F1, GTF2F2, NUDT21, CD2BP2, BUD13, SNRNP48, GEMIN, PPI1, HNRNP43, SLU7</i>                                                                                                                                                                                                                                                                                                                                                                                                                                                                                                                                                                                                                                                                                                                                                                                                                                                                  | 30 / 222                                           | 2.1             | 2.76E-04 |
| GO:0010501 | RNA secondary structure unwinding                                               | <i>DDX27, DDX25, AGO1, DHX36, EIF4A3, DDX20, DDX31, DDX42, DDX21, DDX10, DDX50</i>                                                                                                                                                                                                                                                                                                                                                                                                                                                                                                                                                                                                                                                                                                                                                                                                                                                                                                                                                                                                                            | 11 / 44                                            | 3.8             | 4.34E-04 |
| GO:2001235 | positive regulation of apoptotic signaling pathway                              | <i>INIG5, MAGED1, CTSB, INHBB, TP63, CTSC, TGFB1</i>                                                                                                                                                                                                                                                                                                                                                                                                                                                                                                                                                                                                                                                                                                                                                                                                                                                                                                                                                                                                                                                          | 7 / 25                                             | 4.3             | 4.61E-03 |
| GO:0051289 | protein homotrimerization                                                       | <i>SRR, PFKL, CRTG3, ACADL, EVL, HPR1, SOD2, FBP1, TP63, DECR1, THG1L</i>                                                                                                                                                                                                                                                                                                                                                                                                                                                                                                                                                                                                                                                                                                                                                                                                                                                                                                                                                                                                                                     | 11 / 60                                            | 2.8             | 5.12E-03 |
| GO:0007568 | aging                                                                           | <i>SREBF1, CNP, EPO, ITGB2, TACR3, EEF2, ADRA1A, PPP1R9B, NFKB2, GCLC, SRR, EDNRB, RPS6KB1, P2RY1, KRT25, CANX, NAPEPLD, TSP0, DMD, GCLM, CTSC</i>                                                                                                                                                                                                                                                                                                                                                                                                                                                                                                                                                                                                                                                                                                                                                                                                                                                                                                                                                            | 21 / 165                                           | 1.9             | 5.48E-03 |
| GO:0051056 | regulation of small GTPase mediated signal transduction                         | <i>RAP1GAP2, ARHGAP9, GDI1, ITSN1, ARHGAP19, ARAP3, ARAP1, GMP, ARHGAP24, ARHGAP4, BCR, SYDE2, FGD3, ABR, RACGAP1, ARHGAP1, RHOU, SIPA1</i>                                                                                                                                                                                                                                                                                                                                                                                                                                                                                                                                                                                                                                                                                                                                                                                                                                                                                                                                                                   | 18 / 134                                           | 2.1             | 6.37E-03 |
| GO:0006355 | regulation of transcription, DNA-templated                                      | <i>NUP107, JMJD1C, CCAAT2, NR3C2, HOXA9, YY2, PTTG1, ZFP30, POFU1, RUVBL1, ZNF449, HABP4, EP300, ZNF689, SOX6, ZNF324, PDE8A, TSPYL2, TLE2, RFX3, MITF, RUNX3, GTF2F2, ZNF16, ZNF542P, THAP5, ZSCAN21, ZNF558, PREB, HOXB9, UBE2V1, ATF5, ZNF555, CLOCK, ABCG1, ZBTB8A, MAGED1, CREM, CDC47, ZNF22, PNF1, ZNF26, TAF9L, ZBTB10, PDSB1, ATXN3, ZNF827, ZNF703, ZNF426, ZNF543, MTERF3, CNOT10, SMAD5, NFKB2, ZBTB86, ZZZ3, YEATS2, ZNF814, TADA1, ZNF775, ZNF774, SLC2A4RG, ZSCAN2, BNC2, PHF20, CHD9, TFB1M, AFF4, SNAPC5, LBN, ZNF805, MECOM, SIX4, ZNF529, ZNF407, ZNF527, ZNF761, CNOT6L, NCOA5, TSC22D2, IL16, PPHL1, TGFBR1, TOX2, IRF2, ZNF239, ZNF358, ZNF511, VGLL3, ZNF232, KANK1, RGS19, PRKAA2, USPF7X, SRR1, ZBTB43, NR2C2, MLLT3, NR2C1, ZBTB41, ZNF71, ZBTB40, ZNF507, PPR18, ZNF746, DMD, ZNF226, ZNF343, ZNF100, RNF20, PRRX1, ZNF184, UTP4, ZNF181, YLPM1, GTF2H3, PML, ZNF33B, KLF8, ASXL2, ZNF613, ESF1</i>                                                                                                                                                                                | 122 / 1504                                         | 1.2             | 8.40E-03 |
| GO:0007010 | cytoskeleton organization                                                       | <i>TBCCD1, MAST3, SH3KBP1, ARAP3, CAMSAP1, ACTB, ARHGAP4, CNN2, FGD3, CECR2, TUBB2B, STRIP2, ZMYM3, GAN, KRT25, RHOU, DMD, BRWD3, SIPA1, SH3D19</i>                                                                                                                                                                                                                                                                                                                                                                                                                                                                                                                                                                                                                                                                                                                                                                                                                                                                                                                                                           | 20 / 161                                           | 1.9             | 8.83E-03 |
| GO:0006364 | rRNA processing                                                                 | <i>UTP15, WDR36, DDX27, UTP4, PNO1, RPL31, WDR3, RPL12, EIF4A3, DDX21, NOLC1, NOL9, WDR12, RBFA, WDR43, BYSL, BOP1, EBNA1BP2, NOB1, DKC1, R1OK2, R1OK1, RPL28, DCAF13</i>                                                                                                                                                                                                                                                                                                                                                                                                                                                                                                                                                                                                                                                                                                                                                                                                                                                                                                                                     | 24 / 214                                           | 1.7             | 1.27E-02 |
| GO:0006270 | DNA replication initiation                                                      | <i>ORCS, PURA, POLA1, MCM3, MCM4, MCM6, MCM2</i>                                                                                                                                                                                                                                                                                                                                                                                                                                                                                                                                                                                                                                                                                                                                                                                                                                                                                                                                                                                                                                                              | 7 / 32                                             | 3.3             | 1.60E-02 |
| GO:0006750 | glutathione biosynthetic process                                                | <i>GGT5, GCLC, HAGH, CHAC1, GCLM</i>                                                                                                                                                                                                                                                                                                                                                                                                                                                                                                                                                                                                                                                                                                                                                                                                                                                                                                                                                                                                                                                                          | 5 / 16                                             | 4.8             | 1.75E-02 |
| GO:0006461 | protein complex assembly                                                        | <i>CD74, SF3B3, NIFK, GPA1, FANCC, MITF, PML, TAPB, SLC7A6, CCNB1, SLC7A7, PPP2R1B, ZW10, PPH1, KCNQ5</i>                                                                                                                                                                                                                                                                                                                                                                                                                                                                                                                                                                                                                                                                                                                                                                                                                                                                                                                                                                                                     | 15 / 116                                           | 2.0             | 1.88E-02 |
| GO:0008360 | regulation of cell shape                                                        | <i>TBCCD1, SH3KBP1, LST1, ITGB2, ARAP3, ARAP1, CORO1A, MYL12A, FGD3, FGR, STRIP2, FES, ANXA7, FLEKHD1, RHOU, MYH10, BRWD3</i>                                                                                                                                                                                                                                                                                                                                                                                                                                                                                                                                                                                                                                                                                                                                                                                                                                                                                                                                                                                 | 17 / 140                                           | 1.9             | 2.03E-02 |
| GO:0001932 | regulation of protein phosphorylation                                           | <i>LYN, SOCS1, CDC28C, TADA3, TLR7, PML, PPP1R9B</i>                                                                                                                                                                                                                                                                                                                                                                                                                                                                                                                                                                                                                                                                                                                                                                                                                                                                                                                                                                                                                                                          | 7 / 34                                             | 3.2             | 2.13E-02 |
| GO:0006357 | regulation of transcription from RNA polymerase II promoter                     | <i>GMEB1, CBFH, EPO, MAGED1, TSHZ1, CITED4, GLIS3, PURA, TCEAL6, TCEAL5, ZMYM3, HSF2, CREG1, RUVBL1, GTF2IRD2B, SMARCC1, BRD3, IFNAR2, SREBF1, ZNF143, ANXA4, ACTL6A, TCF12, VEZF1, MITF, ELP4, FOXP4, SOD2, RUND3, NFKB2, TADA2B, CTDSP1, MED21, TADA3, TADA1, IRF5, ATF5, CLOCK, BRWD3, ZSCAN29, VGLL3</i>                                                                                                                                                                                                                                                                                                                                                                                                                                                                                                                                                                                                                                                                                                                                                                                                  | 41 / 441                                           | 1.4             | 2.20E-02 |
| GO:0006334 | nucleosome assembly                                                             | <i>TSPYL2, HIST1H2BM, SHPRH, SET, HIST1H2BI, HIST2HBE, SART3, HIST1H1D, HIST1H4H, H1FX, HIST1H2BD, HIST1H3D, HIST1H4F, MCM2, TSPYL5</i>                                                                                                                                                                                                                                                                                                                                                                                                                                                                                                                                                                                                                                                                                                                                                                                                                                                                                                                                                                       | 15 / 119                                           | 1.9             | 2.30E-02 |
| GO:0040001 | establishment of mitotic spindle localization                                   | <i>NUSAP1, CLASP1, KPNB1</i>                                                                                                                                                                                                                                                                                                                                                                                                                                                                                                                                                                                                                                                                                                                                                                                                                                                                                                                                                                                                                                                                                  | 3 / 4                                              | 11.5            | 2.34E-02 |
| GO:1900034 | regulation of cellular response to heat                                         | <i>DNAJC2, NUP107, SEH1L, RPA3, TPR, CHORDC1, MAPKAPK2, EP300, NUP54, CCAAT2, ATR</i>                                                                                                                                                                                                                                                                                                                                                                                                                                                                                                                                                                                                                                                                                                                                                                                                                                                                                                                                                                                                                         | 11 / 75                                            | 2.2             | 2.34E-02 |
| GO:0006268 | DNA unwinding involved in DNA replication                                       | <i>PURA, MCM4, MCM6, MCM2</i>                                                                                                                                                                                                                                                                                                                                                                                                                                                                                                                                                                                                                                                                                                                                                                                                                                                                                                                                                                                                                                                                                 | 4 / 10                                             | 6.1             | 2.35E-02 |
| GO:0006260 | DNA replication                                                                 | <i>ACHE, SUPT16H, SET, PCNA, ORCS, INGS, POLA1, DNAJC2, RPA3, MCM3, TIMELESS, MCM4, NT5M, MCM6, DTD1, ATR, MCM2, RHNO1</i>                                                                                                                                                                                                                                                                                                                                                                                                                                                                                                                                                                                                                                                                                                                                                                                                                                                                                                                                                                                    | 18 / 155                                           | 1.8             | 2.46E-02 |
| GO:0060048 | cardiac muscle contraction                                                      | <i>MYBPC3, CSRP3, VEGFB, DMD, TAZ, SMAD5, MYH6, MYH7</i>                                                                                                                                                                                                                                                                                                                                                                                                                                                                                                                                                                                                                                                                                                                                                                                                                                                                                                                                                                                                                                                      | 8 / 45                                             | 2.7             | 2.55E-02 |
| GO:0007080 | mitotic metaphase plate congression                                             | <i>CCNB1, SEH1L, ZW10, CHMP2B, RRS1, KIF22, KPNB1</i>                                                                                                                                                                                                                                                                                                                                                                                                                                                                                                                                                                                                                                                                                                                                                                                                                                                                                                                                                                                                                                                         | 7 / 37                                             | 2.9             | 3.12E-02 |
| GO:0034605 | cellular response to heat                                                       | <i>LYN, ATXN3, HDAC2, STS3A1, TPR, NFI, SLU7</i>                                                                                                                                                                                                                                                                                                                                                                                                                                                                                                                                                                                                                                                                                                                                                                                                                                                                                                                                                                                                                                                              | 7 / 37                                             | 2.9             | 3.12E-02 |
| GO:0008283 | cell proliferation                                                              | <i>KHDRBS1, ACHE, PCNA, PAK1IP1, SRR1, ADRA1D, PDSB8, GNAID, FRAT2, CREG1, PPP1R8, ERBB2, TSP0, ANXA7, MYH10, MAP4K1, IFNAR2, CD74, USP8, SPMK2, XRCC5, WDR12, BYSL, GNL3, TRAP1, BOP1, POLA1, FES, DKC1, IRP2, MAP3K11, SIPA1, RAPGEF3, ZPR1</i>                                                                                                                                                                                                                                                                                                                                                                                                                                                                                                                                                                                                                                                                                                                                                                                                                                                             | 34 / 366                                           | 1.4             | 3.71E-02 |
| GO:0001919 | regulation of receptor recycling                                                | <i>ACHE, KIF16B, LAMTOR1</i>                                                                                                                                                                                                                                                                                                                                                                                                                                                                                                                                                                                                                                                                                                                                                                                                                                                                                                                                                                                                                                                                                  | 3 / 5                                              | 9.2             | 3.73E-02 |
| GO:0046627 | negative regulation of insulin receptor signaling pathway                       | <i>KANK1, PTPRE, SOCS1, CISH, RPS6KB1, NCOA5</i>                                                                                                                                                                                                                                                                                                                                                                                                                                                                                                                                                                                                                                                                                                                                                                                                                                                                                                                                                                                                                                                              | 6 / 29                                             | 3.2             | 3.77E-02 |
| GO:0006801 | superoxide metabolic process                                                    | <i>IMMP2L, SH3PX2A, NOX4, CYBA, SOD2</i>                                                                                                                                                                                                                                                                                                                                                                                                                                                                                                                                                                                                                                                                                                                                                                                                                                                                                                                                                                                                                                                                      | 5 / 20                                             | 3.8             | 3.78E-02 |
| GO:0006120 | mitochondrial electron transport, NADH to ubiquinone                            | <i>NDUFS8, NDUFB5, NDUFB11, NDUFA3, NDUFA1, ND1, NDUFV1, ND2</i>                                                                                                                                                                                                                                                                                                                                                                                                                                                                                                                                                                                                                                                                                                                                                                                                                                                                                                                                                                                                                                              | 8 / 49                                             | 2.5             | 3.86E-02 |
| GO:0021762 | substantia nigra development                                                    | <i>LDHA, CNP, HSPA5, CALM3, CKB, CALM2, ACTB, COX6B1</i>                                                                                                                                                                                                                                                                                                                                                                                                                                                                                                                                                                                                                                                                                                                                                                                                                                                                                                                                                                                                                                                      | 8 / 49                                             | 2.5             | 3.86E-02 |
| GO:0000226 | microtubule cytoskeleton organization                                           | <i>EML4, ATXN3, CNP, CNTN2, MAP6D1, TUBG1, MD1, CLASP1, MARK2, ZPR1</i>                                                                                                                                                                                                                                                                                                                                                                                                                                                                                                                                                                                                                                                                                                                                                                                                                                                                                                                                                                                                                                       | 10 / 71                                            | 2.2             | 4.07E-02 |
| GO:0031124 | mRNA 3'-end processing                                                          | <i>NUDT21, NCBP1, CSTF2, EIF4A3, PAPOLA, UPF3B, SLU7, THOC7</i>                                                                                                                                                                                                                                                                                                                                                                                                                                                                                                                                                                                                                                                                                                                                                                                                                                                                                                                                                                                                                                               | 8 / 50                                             | 2.4             | 4.25E-02 |
| GO:0008380 | mRNA splicing                                                                   | <i>RBFOX2, SF3B3, NCBP1, MTERF3, EIF4A3, CCAAT2, THOC7, IWS1, SRPK1, PPP1R9B, AFF2, SYNCRIP, PPP1R8, ZNF326, SNRNP48, PPK3, HNRNP43, ZPR1</i>                                                                                                                                                                                                                                                                                                                                                                                                                                                                                                                                                                                                                                                                                                                                                                                                                                                                                                                                                                 | 18 / 166                                           | 1.7             | 4.35E-02 |
| GO:0071480 | cellular response to gamma radiation                                            | <i>XRCC5, NOX4, CYBA, ATR, TSPYL5</i>                                                                                                                                                                                                                                                                                                                                                                                                                                                                                                                                                                                                                                                                                                                                                                                                                                                                                                                                                                                                                                                                         | 5 / 21                                             | 3.6             | 4.43E-02 |
| GO:0019722 | calcium-mediated signaling                                                      | <i>AGTR1, CXCR4, CALM3, CCR5, CALM2, LACRT, CAMKK2, PPP1R9B</i>                                                                                                                                                                                                                                                                                                                                                                                                                                                                                                                                                                                                                                                                                                                                                                                                                                                                                                                                                                                                                                               | 8 / 51                                             | 2.4             | 4.66E-02 |
| GO:0007169 | transmembrane receptor protein tyrosine kinase signaling pathway                | <i>LYN, FGR, DDR1, MUSK, ERBB2, CD7, ABL2, LCP2, CSK, GAB2, ANGPT1, MTSS1</i>                                                                                                                                                                                                                                                                                                                                                                                                                                                                                                                                                                                                                                                                                                                                                                                                                                                                                                                                                                                                                                 | 12 / 96                                            | 1.9             | 4.80E-02 |
| GO:0007512 | adult heart development                                                         | <i>ADRA1A, MYH10, MYH6, MYH7</i>                                                                                                                                                                                                                                                                                                                                                                                                                                                                                                                                                                                                                                                                                                                                                                                                                                                                                                                                                                                                                                                                              | 4 / 13                                             | 4.7             | 4.85E-02 |
| GO:0045088 | regulation of innate immune response                                            | <i>FGR, TKFC, IRF1, XIAP</i>                                                                                                                                                                                                                                                                                                                                                                                                                                                                                                                                                                                                                                                                                                                                                                                                                                                                                                                                                                                                                                                                                  | 4 / 13                                             | 4.7             | 4.85E-02 |
| GO:0006351 | transcription, DNA-templated                                                    | <i>CRTC3, JMJD1C, CCAAT2, NR3C2, HOXA9, YY2, ZFP30, RUVBL1, ZNF449, HABP4, ZNF326, ZNF689, SOX6, ZNF324, TP63, TSPYL2, TLE4, TLE2, ZNF281, KCTD11, RFX3, FOXF4, ILF2, PIAS2, ZNF16, ZNF542P, EID2, THAP5, ZSCAN21, ERF, TIMELESS, ZNF558, PREB, HOXB2, ZNF555, CLOCK, ZSCAN29, KHDRBS1, ZBTB8A, TSHZ1, CREM, CDC47, ZNF22, ZNF26, ZBTB2, ATXN3, ZNF827, DHX36, ZNF703, ZNF425, GTF2IRD2B, ZNF543, XRCC5, SNAI3, CNOT10, MINA, SMAD5, TADA2B, ZBTB86, ZZZ3, AGO1, TADA3, TADA1, ZNF775, ZNF774, SLC2A4RG, ZSCAN2, BNC2, PHF20, CHD9, CITED4, CHD6, NKAP, MED19, TFB1M, INGS, CSRP3, LBN, ZNF805, MECOM, VPS27, ZNF529, ZNF407, ZNF527, YAF2, ZNF761, BRD3, TSC22D4, CNOT6L, NCOA5, ACTL6A, IL16, PPHL1, PPRC1, KLF16, DNAJC2, RIPPL3, TOX2, MED21, ZNF238, IRF5, ZNF358, ZNF511, VGLL3, ZNF232, KANK1, GTF3C3, HDAC2, PRKAA2, ZBTB43, ZBTB42, NR2C2, MLLT3, NR2C1, ZBTB41, IWS1, ZNF7, ZBTB40, PURA, TCEAL6, TCEAL5, ZNF507, TP53NP2, ERBB2, ATXN1L, PPP1R8, ZNF746, E2F3, ZNF226, ZNF343, ZNF100, KDM4A, ZNF184, UTP4, ZNF181, YLPM1, PML, ZNF33B, TBX2, KLF8, ASXL2, ZNF613, ESF1, RGS12, NAA15, NEUROG2</i> | 146 / 1955                                         | 1.1             | 5.08E-02 |
| GO:0032981 | mitochondrial respiratory chain complex I assembly                              | <i>NDUFS8, NDUFB5, NDUFB11, NDUFA3, NDUFA1, ND1, TAZ, NDUFV1, ND2</i>                                                                                                                                                                                                                                                                                                                                                                                                                                                                                                                                                                                                                                                                                                                                                                                                                                                                                                                                                                                                                                         | 9 / 63                                             | 2.2             | 5.15E-02 |
| GO:0006368 | transcription elongation from RNA polymerase II promoter                        | <i>PCID2, SUPT16H, TAF12, NCBP1, LE01, ELF4, GTF2F1, GTF2H3, GTF2F2, TAF3, THOC7</i>                                                                                                                                                                                                                                                                                                                                                                                                                                                                                                                                                                                                                                                                                                                                                                                                                                                                                                                                                                                                                          | 11 / 86                                            | 2.0             | 5.31E-02 |
| GO:0031442 | positive regulation of mRNA 3'-end processing                                   | <i>CCNB1, NCBP1, LE01</i>                                                                                                                                                                                                                                                                                                                                                                                                                                                                                                                                                                                                                                                                                                                                                                                                                                                                                                                                                                                                                                                                                     | 3 / 6                                              | 7.7             | 5.35E-02 |
| GO:0009437 | carnitine metabolic process                                                     | <i>SLC22A4, SLC22A5, CROT</i>                                                                                                                                                                                                                                                                                                                                                                                                                                                                                                                                                                                                                                                                                                                                                                                                                                                                                                                                                                                                                                                                                 | 3 / 6                                              | 7.7             | 5.35E-02 |
| GO:0006999 | nuclear pore organization                                                       | <i>SEH1L, TPR, NUP54</i>                                                                                                                                                                                                                                                                                                                                                                                                                                                                                                                                                                                                                                                                                                                                                                                                                                                                                                                                                                                                                                                                                      | 3 / 6                                              | 7.7             | 5.35E-02 |
| GO:0045727 | positive regulation of translation                                              | <i>RPS6KB1, ERBB2, EIF4A3, CIRBP, UPF3B, EEF2, ELAVL1, RBMS3</i>                                                                                                                                                                                                                                                                                                                                                                                                                                                                                                                                                                                                                                                                                                                                                                                                                                                                                                                                                                                                                                              | 8 / 53                                             | 2.3             | 5.55E-02 |
| GO:0042127 | regulation of cell proliferation                                                | <i>RBFOX2, CDC47, XIAP, PDSB8, NDRG1, PPP1R9B, GNL3, CNN2, FGR, PURA, EID2, FES, RPA3, MZB1, TIMELESS, AGTR1, ABL2, CSK, TNFRSF25</i>                                                                                                                                                                                                                                                                                                                                                                                                                                                                                                                                                                                                                                                                                                                                                                                                                                                                                                                                                                         | 19 / 185                                           | 1.6             | 5.84E-02 |
| GO:0007064 | mitotic sister chromatid cohesion                                               | <i>POCG, PDSB8, SMC3, WAPL</i>                                                                                                                                                                                                                                                                                                                                                                                                                                                                                                                                                                                                                                                                                                                                                                                                                                                                                                                                                                                                                                                                                | 4 / 14                                             | 4.4             | 5.88E-02 |
| GO:0032988 | positive regulation of transcription elongation from RNA polymerase II promoter | <i>SUPT16H, LE01, GTF2F1, GTF2F2</i>                                                                                                                                                                                                                                                                                                                                                                                                                                                                                                                                                                                                                                                                                                                                                                                                                                                                                                                                                                                                                                                                          | 4 / 14                                             | 4.4             | 5.88E-02 |
| GO:0014823 | response to activity                                                            | <i>GCLC, SCQ2, UOGRG1, CYBA, SOD2, GCLM, SLC26A25</i>                                                                                                                                                                                                                                                                                                                                                                                                                                                                                                                                                                                                                                                                                                                                                                                                                                                                                                                                                                                                                                                         | 7 / 43                                             | 2.5             | 5.90E-02 |
| GO:1904837 | beta-catenin-TCF complex assembly                                               | <i>TLE4, TLE2, RUVBL1, LE01, EP300, HIST1H4H, HIST1H4F</i>                                                                                                                                                                                                                                                                                                                                                                                                                                                                                                                                                                                                                                                                                                                                                                                                                                                                                                                                                                                                                                                    | 7 / 43                                             | 2.5             | 5.90E-02 |
| GO:0043986 | histone H3 acetylation                                                          | <i>INIG5, TAF12, YEATS2, TADA3, TADA1, ELP4, TAF9L</i>                                                                                                                                                                                                                                                                                                                                                                                                                                                                                                                                                                                                                                                                                                                                                                                                                                                                                                                                                                                                                                                        | 7 / 43                                             | 2.5             | 5.90E-02 |
| GO:0043044 | ATP-dependent chromatin remodeling                                              | <i>SMARCC1, CEBPD, HDAC2, ACTL6A, ACTB</i>                                                                                                                                                                                                                                                                                                                                                                                                                                                                                                                                                                                                                                                                                                                                                                                                                                                                                                                                                                                                                                                                    | 5 / 23                                             | 3.3             | 5.92E-02 |
| GO:0002027 | regulation of heart rate                                                        | <i>POPD2, CALM3, DMD, CALM2, MYH6, MYH7</i>                                                                                                                                                                                                                                                                                                                                                                                                                                                                                                                                                                                                                                                                                                                                                                                                                                                                                                                                                                                                                                                                   | 6 / 33                                             | 2.6             | 6.09E-02 |
| GO:0006406 | mRNA export from nucleus                                                        | <i>NUP107, NXT1, SEH1L, NCBP1, DDX25, TPR, EIF4A3, UPF3B, BUD13, NUP54, SLU7, THOC7</i>                                                                                                                                                                                                                                                                                                                                                                                                                                                                                                                                                                                                                                                                                                                                                                                                                                                                                                                                                                                                                       | 12 / 100                                           | 1.8             | 6.12E-02 |
| GO:0042493 | response to drug                                                                | <i>HDAC2, ABCD3, HTR2C, SLC1A3, SLC6A2, ADRA1A, SRR, LDHA, CCNB1, TSP0, PMS2, PMS1, ABCA1, LYN, SREBF1, XRCC5, BAD, VEGFB, GGH, CYBA, SOD2, DHODH, NPC1, RPS6KB1, LON2, ND1, GCLM, ATR</i>                                                                                                                                                                                                                                                                                                                                                                                                                                                                                                                                                                                                                                                                                                                                                                                                                                                                                                                    | 28 / 304                                           | 1.4             | 6.38E-02 |
| GO:0006405 | RNA export from nucleus                                                         | <i>NXT1, NCBP1, TPR, EIF4A3, UPF3B, HNRNP1A, SLU7, THOC7</i>                                                                                                                                                                                                                                                                                                                                                                                                                                                                                                                                                                                                                                                                                                                                                                                                                                                                                                                                                                                                                                                  | 8 / 55                                             | 2.2             | 6.54E-02 |
| GO:0000082 | G1/S transition of mitotic cell cycle                                           | <i>ORCS, POLA1, PCNA, RPS6KB1, RPA3, EIF4EBP1, MCM3, MCM4, RHOU, MCM6, CDKN3, MCM2</i>                                                                                                                                                                                                                                                                                                                                                                                                                                                                                                                                                                                                                                                                                                                                                                                                                                                                                                                                                                                                                        | 12 / 102                                           | 1.8             | 6.86E-02 |
| GO:0006897 | endocytosis                                                                     | <i>SORT1, FNBP1, SGIP1, SH3KBP1, LRP4, C9ORF72, EHD1, EEA1, SNX4, NECAP1, NPC1, PACSIN3, RIN3, LDLR, RAB7A</i>                                                                                                                                                                                                                                                                                                                                                                                                                                                                                                                                                                                                                                                                                                                                                                                                                                                                                                                                                                                                | 15 / 139                                           | 1.7             | 6.99E-02 |
| GO:0031167 | rRNA methylation                                                                | <i>TRMT112, NSUN4, DMT1, TFB1M</i>                                                                                                                                                                                                                                                                                                                                                                                                                                                                                                                                                                                                                                                                                                                                                                                                                                                                                                                                                                                                                                                                            | 4 / 15                                             | 4.1             | 7.00E-02 |

|            |                                                                  |                                                                                                                                                                                                                                      |          |     |          |
|------------|------------------------------------------------------------------|--------------------------------------------------------------------------------------------------------------------------------------------------------------------------------------------------------------------------------------|----------|-----|----------|
| GO:0006309 | apoptotic DNA fragmentation                                      | <i>CECR2, DFFA, DNASE2B, KPNB1</i>                                                                                                                                                                                                   | 4 / 15   | 4.1 | 7.00E-02 |
| GO:0006691 | leukotriene metabolic process                                    | <i>GG16, ALOX5AP, MAPKAPK2, LTA4H</i>                                                                                                                                                                                                | 4 / 15   | 4.1 | 7.00E-02 |
| GO:0014898 | cardiac muscle hypertrophy in response to stress                 | <i>KOM4A, NRP2C, MYH6, MYH7</i>                                                                                                                                                                                                      | 4 / 15   | 4.1 | 7.00E-02 |
| GO:0045947 | negative regulation of translational initiation                  | <i>TPR, EIF4EBP1, EIF4EBP2, EIF4EBP3</i>                                                                                                                                                                                             | 4 / 15   | 4.1 | 7.00E-02 |
| GO:0038066 | p38MAPK cascade                                                  | <i>MAPKAPK2, LGALS9, NR2C2</i>                                                                                                                                                                                                       | 3 / 7    | 6.6 | 7.18E-02 |
| GO:0006282 | regulation of DNA repair                                         | <i>UBE2N, USP1, UBE2V1</i>                                                                                                                                                                                                           | 3 / 7    | 6.6 | 7.18E-02 |
| GO:0048841 | regulation of axon extension involved in axon guidance           | <i>PLXND1, PLXNA2, PLXNC1</i>                                                                                                                                                                                                        | 3 / 7    | 6.6 | 7.18E-02 |
| GO:0030388 | fructose 1,6-bisphosphate metabolic process                      | <i>PFKL, ALDOC, FBP1</i>                                                                                                                                                                                                             | 3 / 7    | 6.6 | 7.18E-02 |
| GO:0051301 | cell division                                                    | <i>DCLRE1A, ANAPC13, SDCCAG3, SEH1L, ZWILCH, CETN3, CDC47, PDSSB, SMC3, PMF1, GNAI2, SMC2, CCNB3, PPP1CB, CCNB1, PTTG1, TPR, POZ, RUVBL1, TXNL4A, CLASP1, NEK4, DYNLT3, WAPL, HAUS2, ZNF16, STAG1, FAM175B, ZW10, TIMELESS, ARF6</i> | 31 / 350 | 1.4 | 7.64E-02 |
| GO:0000375 | RNA splicing, via transesterification reactions                  | <i>SF3B3, TRA2B, WDR83, TXNL4A, SLU7</i>                                                                                                                                                                                             | 5 / 25   | 3.1 | 7.65E-02 |
| GO:0042254 | ribosome biogenesis                                              | <i>BOP1, LSG1, DDX31, UBR2, MINA, GNL3</i>                                                                                                                                                                                           | 6 / 36   | 2.6 | 8.26E-02 |
| GO:0042795 | snRNA transcription from RNA polymerase II promoter              | <i>SNAPC5, ZNF143, NCBP1, SRRT, INTS5, INTS7, RPRD1B, GTF2F1, GTF2F2</i>                                                                                                                                                             | 9 / 70   | 2.0 | 8.49E-02 |
| GO:0006890 | retrograde vesicle-mediated transport, Golgi to ER               | <i>RINT1, RACGAP1, KIF3A, PITPNB, ZW10, COG3, COG2, KIF22, DNAJC28, TAPBP</i>                                                                                                                                                        | 10 / 82  | 1.9 | 8.59E-02 |
| GO:0071407 | cellular response to organic cyclic compound                     | <i>CCNB1, RGS19, RPS6KB1, TIPARP, P2RY1, AXIN1, CYBA, SMAD5</i>                                                                                                                                                                      | 8 / 59   | 2.1 | 8.83E-02 |
| GO:0010467 | gene expression                                                  | <i>METTL14, NCBP1, NOX4, LTB, GTF2F1, HNRNPA1, GTF2F2</i>                                                                                                                                                                            | 7 / 48   | 2.2 | 9.06E-02 |
| GO:0098655 | cation transmembrane transport                                   | <i>SLC22A4, SLC22A5, TMEM63C, SLC41A3, GAR1, ANO10, FAM26F</i>                                                                                                                                                                       | 7 / 48   | 2.2 | 9.06E-02 |
| GO:0006002 | fructose 6-phosphate metabolic process                           | <i>PFKL, FBP1, PFKM</i>                                                                                                                                                                                                              | 3 / 8    | 5.7 | 9.17E-02 |
| GO:0017183 | peptidyl-diphtamide biosynthetic process from peptidyl-histidine | <i>DPH2, DPH6, EEP2</i>                                                                                                                                                                                                              | 3 / 8    | 5.7 | 9.17E-02 |
| GO:0098789 | pre-mRNA cleavage required for polyadenylation                   | <i>NCBP1, CSTF2, CSTF2T</i>                                                                                                                                                                                                          | 3 / 8    | 5.7 | 9.17E-02 |
| GO:0034383 | low-density lipoprotein particle clearance                       | <i>EHD1, DGAT2, LDLR</i>                                                                                                                                                                                                             | 3 / 8    | 5.7 | 9.17E-02 |
| GO:0006337 | nucleosome disassembly                                           | <i>SMARCE1, SUPT16H, SET, HIST3H2A</i>                                                                                                                                                                                               | 4 / 17   | 3.6 | 9.51E-02 |
| GO:0006400 | tRNA modification                                                | <i>METTL1, URM1, TRMT6, AARS, THG1L</i>                                                                                                                                                                                              | 5 / 27   | 2.8 | 9.59E-02 |
| GO:0042752 | regulation of circadian rhythm                                   | <i>PPP1CB, PRKAA2, MAGED1, TIMELESS, CREM, PML, CCAR2</i>                                                                                                                                                                            | 7 / 49   | 2.2 | 9.79E-02 |



Supplementary table 5. Gene ontology analysis of transiently differentially expressed genes OB (0w) vs OB (2w). The GO-terms colored in green are depicted in the go plot in suppl.fig.5a. Gene names given in italics.

| GO-term    | Pathway                                                                         | Gene symbol                                                                                                                                                                                                                                                                                                                                                                                                                                                                                                                                                                                                                                                                                                                                                                                                                                                                                                            | Number of genes / total number of genes in pathway | Fold enrichment | P-value  |
|------------|---------------------------------------------------------------------------------|------------------------------------------------------------------------------------------------------------------------------------------------------------------------------------------------------------------------------------------------------------------------------------------------------------------------------------------------------------------------------------------------------------------------------------------------------------------------------------------------------------------------------------------------------------------------------------------------------------------------------------------------------------------------------------------------------------------------------------------------------------------------------------------------------------------------------------------------------------------------------------------------------------------------|----------------------------------------------------|-----------------|----------|
| GO:0000398 | mRNA splicing, via spliceosome                                                  | <i>SF3B3, CSTF2, SRR1, EIF4A3, PPWD1, WDR83, ELAVL1, U2AF1L4, SYNCRIP, METTL14, SART3, RAVR1, TRA2B, CWC22, PAPOLA, TXNL4A, HNRNPA1, NCBP1, UPF3B, GTF2F1, GTF2F2, NUDT21, BUD13, SNRNP48, GEMIN6, PPIH, HNRNP3, SLU7</i>                                                                                                                                                                                                                                                                                                                                                                                                                                                                                                                                                                                                                                                                                              | 28 / 222                                           | 2.4             | 5.11E-05 |
| GO:0010501 | RNA secondary structure unwinding                                               | <i>DDX27, DDX25, AGO1, DHX36, EIF4A3, DDX20, DDX31, DDX42, DDX12, DDX10, DDX50</i>                                                                                                                                                                                                                                                                                                                                                                                                                                                                                                                                                                                                                                                                                                                                                                                                                                     | 11 / 44                                            | 4.7             | 8.10E-05 |
| GO:0006364 | rRNA processing                                                                 | <i>UTP15, WDR36, DDX27, UTP4, PNO1, RPL31, WDR3, RPL12, EIF4A3, DDX21, NOLC1, NOL9, WDR12, RBFA, WDR43, BYSL, BOP1, EBNA1BP2, NOB1, DKC1, R1OK2, R1OK1, RPL28, DCAF13</i>                                                                                                                                                                                                                                                                                                                                                                                                                                                                                                                                                                                                                                                                                                                                              | 24 / 214                                           | 2.1             | 1.05E-03 |
| GO:0051289 | protein homotrimerization                                                       | <i>SRR, PPK1, CRTCS, ACADL, EVL, HPRT1, SOD2, TP63, DECR1, THG1L</i>                                                                                                                                                                                                                                                                                                                                                                                                                                                                                                                                                                                                                                                                                                                                                                                                                                                   | 10 / 60                                            | 3.1             | 4.17E-03 |
| GO:0007568 | aging                                                                           | <i>SREBF1, CNP, EPO, TACR3, EEF2, ADRA1A, PPP1R9B, NFKB2, GCLC, SRR, EDNRB, RPS6KB1, KRT25, CANX, NAPEPLD, TSPD, DMD, GCLM</i>                                                                                                                                                                                                                                                                                                                                                                                                                                                                                                                                                                                                                                                                                                                                                                                         | 18 / 165                                           | 2.1             | 6.81E-03 |
| GO:0060048 | cardiac muscle contraction                                                      | <i>MYBPC3, CSRP3, VEGFB, DMD, TAZ, SMAD5, MYH6, MYH7</i>                                                                                                                                                                                                                                                                                                                                                                                                                                                                                                                                                                                                                                                                                                                                                                                                                                                               | 8 / 45                                             | 3.3             | 9.04E-03 |
| GO:0051301 | cell division                                                                   | <i>DCLRE1A, ANAPC13, SDCCAG3, SEH1L, ZWILCH, CETN3, CDC47, PDS5B, SMC3, PMF1, GNAU2, SMC2, CCNB3, PPP1C8, CCNB1, PTTG1, TPR, POS2, RUVBL1, TXNL4A, NEKA, DYNLT3, WAPL, HAUS2, ZNF16, STAG1, FAM175B, ZW10, TIMELESS, ARF6</i>                                                                                                                                                                                                                                                                                                                                                                                                                                                                                                                                                                                                                                                                                          | 30 / 350                                           | 1.6             | 1.19E-02 |
| GO:0006406 | mRNA export from nucleus                                                        | <i>NUP107, NXT1, SEH1L, NCBP1, DDX25, TPR, EIF4A3, UPF3B, BUD13, NUP54, SLU7, THOC7</i>                                                                                                                                                                                                                                                                                                                                                                                                                                                                                                                                                                                                                                                                                                                                                                                                                                | 12 / 100                                           | 2.3             | 1.70E-02 |
| GO:0006355 | regulation of transcription, DNA-templated                                      | <i>NUP107, JMJD1C, CCAR2, NR3C2, HOXA9, YY2, PTTG1, ZFP30, POFU1, RUVBL1, ZNF449, HAPB4, EP300, ZNF689, SOX6, ZNF324, PDS5A, TSPYL2, RFX3, MITF, RUXK3, GTF2F2, ZNF16, ZNF542P, THAP5, ZSCAN21, ZNF558, PREB, HOXB2, ATF5, ZNF555, CLOCK, ZBTB8A, CREM, CDC47, ZNF22, PMF1, TAF5L, ZBTB2, ATXN3, ZNF27, ZNF703, ZNF425, ZNF543, MTERF3, CNOT10, SMAD5, NFKB2, ZBTB6, ZZZ3, YEATS2, ZNF814, TADA1, ZNF774, SLC2A4RG, ZSCAN2, BNC2, PHF20, CHD9, TFEB1M, AFF4, SNAPCS, LBH, ZNF805, MECOM, SIX4, ZNF529, ZNF407, ZNF527, ZNF761, CNOT8L, NCOA5, TSC2D22, PPHL1M1, TGFBR1, TOX2, ZNF239, ZNF358, ZNF511, ZNF32, KANK1, PRKAA2, USP27X, SRR1, NR2C2, ZBTB41, ZBTB40, ZNF507, ZNF746, DMD, ZNF343, RNFD2, ZNF184, UTP4, ZNF181, YLPM1, ZNF33B, KLF8, ASXL2, ESF1</i>                                                                                                                                                        | 100 / 1504                                         | 1.3             | 1.45E-02 |
| GO:0008380 | RNA splicing                                                                    | <i>RFXOX2, SF3B3, NCBP1, MTERF3, EIF4A3, CCAR2, THOC7, IWS1, SRPK1, PPP1R9B, AFF2, SYNCRIP, ZNF326, SNRNP48, PPIG, HNRNP43, ZPR1</i>                                                                                                                                                                                                                                                                                                                                                                                                                                                                                                                                                                                                                                                                                                                                                                                   | 17 / 166                                           | 1.9             | 1.55E-02 |
| GO:0019722 | calcium-mediated signaling                                                      | <i>AGTR1, CXCR4, CALM3, CCR5, CALM2, LACRT, CAMKK2, PPP1R9B</i>                                                                                                                                                                                                                                                                                                                                                                                                                                                                                                                                                                                                                                                                                                                                                                                                                                                        | 8 / 51                                             | 2.9             | 1.76E-02 |
| GO:0006890 | retrograde vesicle-mediated transport, Golgi to ER                              | <i>RINT1, RACGAP1, KIF3A, PITPNB, ZW10, COG3, COPG2, KIF22, DNAJC2B, TAPBP</i>                                                                                                                                                                                                                                                                                                                                                                                                                                                                                                                                                                                                                                                                                                                                                                                                                                         | 10 / 82                                            | 2.3             | 2.96E-02 |
| GO:0010467 | gene expression                                                                 | <i>METTL14, NCBP1, NOX4, LTB, GTF2F1, HNRNPA1, GTF2F2</i>                                                                                                                                                                                                                                                                                                                                                                                                                                                                                                                                                                                                                                                                                                                                                                                                                                                              | 7 / 48                                             | 2.7             | 4.05E-02 |
| GO:0098655 | cation transmembrane transport                                                  | <i>SLC22A4, SLC22A5, TMEM63C, SLC41A3, GAR1, ANO10, FAM26F</i>                                                                                                                                                                                                                                                                                                                                                                                                                                                                                                                                                                                                                                                                                                                                                                                                                                                         | 7 / 48                                             | 2.7             | 4.05E-02 |
| GO:0046627 | negative regulation of insulin receptor signaling pathway                       | <i>KANK1, SOCS1, CISH, RPS6KB1, NCOA5</i>                                                                                                                                                                                                                                                                                                                                                                                                                                                                                                                                                                                                                                                                                                                                                                                                                                                                              | 5 / 29                                             | 3.2             | 6.54E-02 |
| GO:0051056 | regulation of small GTPase mediated signal transduction                         | <i>ARHGAP9, GDI1, ITSN1, ARHGAP19, ARAP3, ARAP1, GMIP, ARHGAP24, ARHGAP4, SYDE2, FGD3, ABR, RACGAP1, RHOU</i>                                                                                                                                                                                                                                                                                                                                                                                                                                                                                                                                                                                                                                                                                                                                                                                                          | 14 / 134                                           | 2.0             | 2.60E-02 |
| GO:0007512 | adult heart development                                                         | <i>ADRA1A, MYH10, MYH6, MYH7</i>                                                                                                                                                                                                                                                                                                                                                                                                                                                                                                                                                                                                                                                                                                                                                                                                                                                                                       | 4 / 13                                             | 5.8             | 2.86E-02 |
| GO:0007080 | mitotic metaphase plate congression                                             | <i>CCNB1, SEH1L, ZW10, CHMP2B, RRS1, KIF22, KPNB1</i>                                                                                                                                                                                                                                                                                                                                                                                                                                                                                                                                                                                                                                                                                                                                                                                                                                                                  | 7 / 37                                             | 3.6             | 1.25E-02 |
| GO:0031124 | mRNA 3'-end processing                                                          | <i>NUDT21, NCBP1, CSTF2, EIF4A3, PAPOLA, UPF3B, SLU7, THOC7</i>                                                                                                                                                                                                                                                                                                                                                                                                                                                                                                                                                                                                                                                                                                                                                                                                                                                        | 8 / 50                                             | 3.0             | 1.58E-02 |
| GO:1900034 | regulation of cellular response to heat                                         | <i>DNAJC2, NUP107, SEH1L, RPA3, TPR, CHORDC1, EP300, NUP54, CCAR2, ATR</i>                                                                                                                                                                                                                                                                                                                                                                                                                                                                                                                                                                                                                                                                                                                                                                                                                                             | 10 / 75                                            | 2.5             | 1.76E-02 |
| GO:0032968 | positive regulation of transcription elongation from RNA polymerase II promoter | <i>SUPT16H, LEO1, GTF2F1, GTF2F2</i>                                                                                                                                                                                                                                                                                                                                                                                                                                                                                                                                                                                                                                                                                                                                                                                                                                                                                   | 4 / 14                                             | 5.4             | 3.50E-02 |
| GO:0007064 | mitotic sister chromatid cohesion                                               | <i>POGZ, PDS5B, SMC3, WAPL</i>                                                                                                                                                                                                                                                                                                                                                                                                                                                                                                                                                                                                                                                                                                                                                                                                                                                                                         | 4 / 14                                             | 5.4             | 3.50E-02 |
| GO:0031442 | positive regulation of mRNA 3'-end processing                                   | <i>CCNB1, NCBP1, LEO1</i>                                                                                                                                                                                                                                                                                                                                                                                                                                                                                                                                                                                                                                                                                                                                                                                                                                                                                              | 3 / 6                                              | 9.4             | 3.67E-02 |
| GO:0006999 | nuclear pore organization                                                       | <i>SEH1L, TPR, NUP54</i>                                                                                                                                                                                                                                                                                                                                                                                                                                                                                                                                                                                                                                                                                                                                                                                                                                                                                               | 3 / 6                                              | 9.4             | 3.67E-02 |
| GO:0009437 | carbamate metabolic process                                                     | <i>SLC22A4, SLC22A5, CROT</i>                                                                                                                                                                                                                                                                                                                                                                                                                                                                                                                                                                                                                                                                                                                                                                                                                                                                                          | 3 / 6                                              | 9.4             | 3.67E-02 |
| GO:0006405 | RNA export from nucleus                                                         | <i>NXT1, NCBP1, TPR, EIF4A3, UPF3B, HNRNPA1, SLU7, THOC7</i>                                                                                                                                                                                                                                                                                                                                                                                                                                                                                                                                                                                                                                                                                                                                                                                                                                                           | 8 / 55                                             | 2.7             | 2.57E-02 |
| GO:0002027 | regulation of heart rate                                                        | <i>POPD2, CALM3, DMD, CALM2, MYH6, MYH7</i>                                                                                                                                                                                                                                                                                                                                                                                                                                                                                                                                                                                                                                                                                                                                                                                                                                                                            | 6 / 33                                             | 3.4             | 2.88E-02 |
| GO:0042795 | siRNA transcription from RNA polymerase II promoter                             | <i>SNAPCS, ZNF143, NCBP1, SRR1, INTS5, INTS7, RPRD1B, GTF2F1, GTF2F2</i>                                                                                                                                                                                                                                                                                                                                                                                                                                                                                                                                                                                                                                                                                                                                                                                                                                               | 9 / 70                                             | 2.4             | 3.16E-02 |
| GO:0006368 | transcription elongation from RNA polymerase II promoter                        | <i>PCID2, SUPT16H, TAF12, NCBP1, LEO1, ELP4, GTF2F1, GTF2F2, TAF3, THOC7</i>                                                                                                                                                                                                                                                                                                                                                                                                                                                                                                                                                                                                                                                                                                                                                                                                                                           | 10 / 86                                            | 2.2             | 3.86E-02 |
| GO:0009791 | post-embryonic development                                                      | <i>RAB3A, TIPARP, IMPAD1, CDC47, SOX6, SOD2, ATF5, TGFBR1, RC3H2</i>                                                                                                                                                                                                                                                                                                                                                                                                                                                                                                                                                                                                                                                                                                                                                                                                                                                   | 9 / 73                                             | 2.3             | 3.93E-02 |
| GO:0045947 | negative regulation of translational initiation                                 | <i>TPR, EIF4EBP1, EIF4EBP2, EIF4EBP3</i>                                                                                                                                                                                                                                                                                                                                                                                                                                                                                                                                                                                                                                                                                                                                                                                                                                                                               | 4 / 15                                             | 5.0             | 4.21E-02 |
| GO:0014886 | cardiac muscle hypertrophy in response to stress                                | <i>KDMAA, NUP54, MYH6, MYH7</i>                                                                                                                                                                                                                                                                                                                                                                                                                                                                                                                                                                                                                                                                                                                                                                                                                                                                                        | 4 / 15                                             | 5.0             | 4.21E-02 |
| GO:0031167 | rRNA methylation                                                                | <i>TRMT12, TRMT12L, NDM1, TFB1M</i>                                                                                                                                                                                                                                                                                                                                                                                                                                                                                                                                                                                                                                                                                                                                                                                                                                                                                    | 4 / 15                                             | 5.0             | 4.21E-02 |
| GO:0006461 | protein complex assembly                                                        | <i>CD74, SLC7A6, CCNB1, SF3B3, NIFK, PPP2R1B, GAA1, ZW10, FANCC, PPIH, MITF, TAPBP</i>                                                                                                                                                                                                                                                                                                                                                                                                                                                                                                                                                                                                                                                                                                                                                                                                                                 | 12 / 116                                           | 1.9             | 4.44E-02 |
| GO:0006357 | regulation of transcription from RNA polymerase II promoter                     | <i>GMEB1, CBF6, EPO, TSHZ1, GLIS3, PURA, HSF2, CREG1, RUVBL1, SMARCE1, BRD3, SREBF1, ZNF143, ANXA4, ACTL6A, TCF12, VEZF1, MITF, ELP4, FOXA4, SOD2, RUXN3, NFKB2, TADA2B, CTDSBP1, MED21, TADA3, TADA1, IRF5, ATF5, CLOCK, BRWD3, ZSCAN29</i>                                                                                                                                                                                                                                                                                                                                                                                                                                                                                                                                                                                                                                                                           | 33 / 441                                           | 1.4             | 4.61E-02 |
| GO:0007010 | cytoskeleton organization                                                       | <i>TBCCD1, MAST3, ARAP3, ACTB, ARHGAP4, CNN2, FGD3, TUBB2B, STRIP2, GAN, KRT25, RHOU, DMD, BRWD3, SH3D19</i>                                                                                                                                                                                                                                                                                                                                                                                                                                                                                                                                                                                                                                                                                                                                                                                                           | 15 / 161                                           | 1.8             | 4.78E-02 |
| GO:0000375 | RNA splicing, via transesterification reactions                                 | <i>SF3B3, TRA2B, WDR83, TXNL4A, SLU7</i>                                                                                                                                                                                                                                                                                                                                                                                                                                                                                                                                                                                                                                                                                                                                                                                                                                                                               | 5 / 25                                             | 3.8             | 4.11E-02 |
| GO:0006351 | transcription, DNA-templated                                                    | <i>CRTC3, JMJD1C, CCAR2, NR3C2, HOXA9, YY2, ZFP30, RUVBL1, ZNF449, HAPB4, ZNF326, ZNF689, SOX6, ZNF324, TP63, TSPYL2, TLE4, ZNF261, KCTD1, RFX3, FOXF4, PIA32, ZNF16, ZNF542P, EID2, THAP5, ZSCAN21, ERF, TIMELESS, ZNF558, PREB, HOXB2, ZNF555, CLOCK, ZSCAN29, KHDRBS1, ZBTB8A, TSHZ1, CREM, CDC47, ZNF22, ZBTB2, ATXN3, ZNF287, DHX36, ZNF703, ZNF425, ZNF543, SNAI3, CNOT10, MINA, SMAD5, TADA2B, ZBTB6, ZZZ3, AGO1, TADA3, TADA1, ZNF774, SLC2A4RG, ZSCAN2, BNC2, PHF20, CHD9, HD6, NKAP, TFEB1M, CSRP3, LBH, ZNF805, MECOM, VPS27, ZNF529, ZNF407, ZNF527, YAF2, ZNF761, BRD3, TSC2D24, CNOT8L, NCOA5, ACTL6A, PPHL1M1, PPRC1, KLF16, DNAJC2, RIPPLY3, TOX2, MED21, ZNF239, IRF5, ZNF358, ZNF511, ZNF32, KANK1, GTF3C3, HDAC2, PRKAA2, ZBTB42, NR2C2, ZBTB41, IWS1, ZBTB40, PURA, ZNF507, ATXN1L, ZNF746, ZNF343, KDMAA, ZNF184, UTP4, ZNF181, YLPM1, ZNF33B, TBX2, KLF8, ASXL2, ESF1, RGS12, NAA15, NEUROG2</i> | 121 / 1955                                         | 1.2             | 4.84E-02 |
| GO:0048841 | regulation of axon extension involved in axon guidance                          | <i>PLXND1, PLXNA2, PLXNC1</i>                                                                                                                                                                                                                                                                                                                                                                                                                                                                                                                                                                                                                                                                                                                                                                                                                                                                                          | 3 / 7                                              | 8.1             | 4.95E-02 |
| GO:0006750 | glutathione biosynthetic process                                                | <i>GGT5, GCLC, CHAC1, GCLM</i>                                                                                                                                                                                                                                                                                                                                                                                                                                                                                                                                                                                                                                                                                                                                                                                                                                                                                         | 4 / 16                                             | 4.7             | 4.99E-02 |
| GO:0019827 | stem cell population maintenance                                                | <i>EIF4ENIF1, METTL14, MED21, LEO1, NKAP, ZNF358, SMC3</i>                                                                                                                                                                                                                                                                                                                                                                                                                                                                                                                                                                                                                                                                                                                                                                                                                                                             | 7 / 50                                             | 2.6             | 4.81E-02 |
| GO:0006369 | termination of RNA polymerase II transcription                                  | <i>NUDT21, NCBP1, CSTF2, EIF4A3, PAPOLA, UPF3B, SLU7, THOC7</i>                                                                                                                                                                                                                                                                                                                                                                                                                                                                                                                                                                                                                                                                                                                                                                                                                                                        | 8 / 64                                             | 2.4             | 5.24E-02 |
| GO:0006397 | mRNA processing                                                                 | <i>KHDRBS1, RFXOX2, SF3B3, CNOT6L, TSEN15, HNRNPL, CCAR2, THOC7, IWS1, SRPK1, AFF2, NUDT21, AGGF1, ZNF326, HNRNPA1, ZPR1</i>                                                                                                                                                                                                                                                                                                                                                                                                                                                                                                                                                                                                                                                                                                                                                                                           | 16 / 179                                           | 1.7             | 5.43E-02 |
| GO:0000302 | response to reactive oxygen species                                             | <i>TXNRD2, TRA2B, GPX7, NOX4, CYBA, SOD2</i>                                                                                                                                                                                                                                                                                                                                                                                                                                                                                                                                                                                                                                                                                                                                                                                                                                                                           | 6 / 39                                             | 2.9             | 5.40E-02 |
| GO:0006457 | protein folding                                                                 | <i>MESDC2, HSP90AA2P, PPWD1, COT6B, HSP90B1, GNAI2, DNAJA1, TMX1, GNB2, DNAJC21, DNAJB11, CANX, PPIF, PPIH, PPIG, CCT5</i>                                                                                                                                                                                                                                                                                                                                                                                                                                                                                                                                                                                                                                                                                                                                                                                             | 16 / 180                                           | 1.7             | 5.64E-02 |
| GO:0045666 | positive regulation of neuron differentiation                                   | <i>SPAG9, KDMAA, IMPACT, TCF12, WWC2L, BNP12, DMD, TCF4, BRINP3</i>                                                                                                                                                                                                                                                                                                                                                                                                                                                                                                                                                                                                                                                                                                                                                                                                                                                    | 9 / 78                                             | 2.2             | 5.46E-02 |
| GO:0016358 | dendrite development                                                            | <i>HDAC2, TRAPPC4, LST1, FLRT1, PPP1R9B</i>                                                                                                                                                                                                                                                                                                                                                                                                                                                                                                                                                                                                                                                                                                                                                                                                                                                                            | 5 / 28                                             | 3.4             | 5.88E-02 |
| GO:0098789 | pre-mRNA cleavage required for polyadenylation                                  | <i>NCBP1, CSTF2, CSTF2T</i>                                                                                                                                                                                                                                                                                                                                                                                                                                                                                                                                                                                                                                                                                                                                                                                                                                                                                            | 3 / 8                                              | 7.1             | 6.38E-02 |
| GO:0017183 | peptidyl-dipeptidase biosynthetic process from peptidyl-histidine               | <i>DPH2, DPH6, EEF2</i>                                                                                                                                                                                                                                                                                                                                                                                                                                                                                                                                                                                                                                                                                                                                                                                                                                                                                                | 3 / 8                                              | 7.1             | 6.38E-02 |
| GO:0040008 | regulation of growth                                                            | <i>SOCS1, ARMC10, CREG1, ACTL6A, RUVBL1, SOCS5, TSPYL5</i>                                                                                                                                                                                                                                                                                                                                                                                                                                                                                                                                                                                                                                                                                                                                                                                                                                                             | 7 / 53                                             | 2.5             | 6.09E-02 |
| GO:0006814 | sodium ion transport                                                            | <i>SLC22A4, SLC4A8, SLC22A5, ATP1A4, SCNTA, SLC38A6, SLC38A8, SLC38A4, SLC9B2</i>                                                                                                                                                                                                                                                                                                                                                                                                                                                                                                                                                                                                                                                                                                                                                                                                                                      | 9 / 81                                             | 2.1             | 6.54E-02 |
| GO:0043066 | negative regulation of apoptotic process                                        | <i>HDAC2, PRKAA2, XIAP, AIF1, HSP90B1, MYDGF, EDNRB, SIX4, FIGLN1, BNP2, CTSB, AAMD, TP63, CD74, PCID2, HSPA5, SPHK2, ANXA4, VEGFB, SOD2, YWHAZ, ZNF16, DNAJA1, GCLC, RPS6KB1, PDDC4, PPIF, NAA15, ANGPLT4, ATF5, LACRT, SOSTM1, CARD14</i>                                                                                                                                                                                                                                                                                                                                                                                                                                                                                                                                                                                                                                                                            | 33 / 455                                           | 1.4             | 6.61E-02 |
| GO:0060037 | pharyngeal system development                                                   | <i>RIPPLY3, SIX4, PLXNA2, TGFBR1</i>                                                                                                                                                                                                                                                                                                                                                                                                                                                                                                                                                                                                                                                                                                                                                                                                                                                                                   | 4 / 18                                             | 4.2             | 6.72E-02 |
| GO:0045022 | early endosome to late endosome transport                                       | <i>EEA1, KIF16B, RILP, RAB7A</i>                                                                                                                                                                                                                                                                                                                                                                                                                                                                                                                                                                                                                                                                                                                                                                                                                                                                                       | 4 / 18                                             | 4.2             | 6.72E-02 |
| GO:0006414 | translational elongation                                                        | <i>EEF1G, AITB1, EEF1E1, EEF2</i>                                                                                                                                                                                                                                                                                                                                                                                                                                                                                                                                                                                                                                                                                                                                                                                                                                                                                      | 4 / 18                                             | 4.2             | 6.72E-02 |
| GO:0042127 | regulation of cell proliferation                                                | <i>RFXOX2, CDC47, XIAP, PDS5B, NDRG1, PPP1R9B, GNL3, CNN2, PURA, EID2, RPA3, MZB1, TIMELESS, AGTR1, ABL2, TNFRSF25</i>                                                                                                                                                                                                                                                                                                                                                                                                                                                                                                                                                                                                                                                                                                                                                                                                 | 16 / 185                                           | 1.6             | 6.82E-02 |
| GO:0008543 | fibroblast growth factor receptor signaling pathway                             | <i>RFXOX2, NCBP1, KIF16B, FLRT1, ANOS1, PTPN11, GTF2F1, HNRNPA1, GTF2F2</i>                                                                                                                                                                                                                                                                                                                                                                                                                                                                                                                                                                                                                                                                                                                                                                                                                                            | 9 / 82                                             | 2.1             | 6.92E-02 |
| GO:0006260 | DNA replication                                                                 | <i>ACHE, SUPT16H, SET, PCNA, ORC5, POLA1, DNAJC2, RPA3, TIMELESS, NTSM, MCM6, DTD1, ATR, RHNO1</i>                                                                                                                                                                                                                                                                                                                                                                                                                                                                                                                                                                                                                                                                                                                                                                                                                     | 14 / 155                                           | 1.7             | 6.93E-02 |
| GO:0007067 | mitotic nuclear division                                                        | <i>DCLRE1A, ANAPC13, NEKA, ZWILCH, DYNLT3, CETN3, NOLC1, KIF22, SMC3, PMF1, HAUS2, VCP1P1, STAG1, PTTG1, ZW10, TPR, TADA3, RUVBL1, TIMELESS, TXNL4A</i>                                                                                                                                                                                                                                                                                                                                                                                                                                                                                                                                                                                                                                                                                                                                                                | 20 / 248                                           | 1.5             | 7.06E-02 |
| GO:0000077 | DNA damage checkpoint                                                           | <i>PTPN11, INTS7, CLOCK, ATR, RHNO1</i>                                                                                                                                                                                                                                                                                                                                                                                                                                                                                                                                                                                                                                                                                                                                                                                                                                                                                | 5 / 30                                             | 3.1             | 7.24E-02 |
| GO:0001938 | positive regulation of endothelial cell proliferation                           | <i>MYDGF, NRP2, NF1, VEGFB, AGGF1, CYBA, CCR3, TGFBR1</i>                                                                                                                                                                                                                                                                                                                                                                                                                                                                                                                                                                                                                                                                                                                                                                                                                                                              | 8 / 69                                             | 2.2             | 7.29E-02 |
| GO:0006749 | glutathione metabolic process                                                   | <i>EEF1G, GGT5, GSTO2, GSTT1, EEF1E1, SOD2, CLIC1</i>                                                                                                                                                                                                                                                                                                                                                                                                                                                                                                                                                                                                                                                                                                                                                                                                                                                                  | 7 / 56                                             | 2.4             | 7.56E-02 |
| GO:0043966 | histone H3 acetylation                                                          | <i>TAF12, YEATS2, TADA3, TADA1, ELP4, TAF9L</i>                                                                                                                                                                                                                                                                                                                                                                                                                                                                                                                                                                                                                                                                                                                                                                                                                                                                        | 6 / 43                                             | 2.6             | 7.62E-02 |
| GO:0014823 | response to activity                                                            | <i>GCLC, UQCRC1, CYBA, SOD2, GCLM, SLC22A25</i>                                                                                                                                                                                                                                                                                                                                                                                                                                                                                                                                                                                                                                                                                                                                                                                                                                                                        | 6 / 43                                             | 2.6             | 7.62E-02 |

Supplementary table 6. Gene ontology analysis of differentially expressed genes: OB (0w) vs OB (12w). The GO-terms colored in green are depicted in the go plot in suppl.fig.5b. Gene names given in italics.

| GO-term    | Pathway                                                                  | Gene symbol                                                                                                                                                             | Number of genes / total number of genes in pathway | Fold enrichment | P-value  |
|------------|--------------------------------------------------------------------------|-------------------------------------------------------------------------------------------------------------------------------------------------------------------------|----------------------------------------------------|-----------------|----------|
| GO:0006614 | SRP-dependent cotranslational protein targeting to membrane              | <i>RPL41, RPL32, RPL10, RPL23, RPL9, RPS25, RPS28, RPL24, RPL38, RPL37, RPL28, RPL26L1, RPS23, RPL19</i>                                                                | 14 / 94                                            | 5.6             | 1.06E-06 |
| GO:0019083 | viral transcription                                                      | <i>RPL41, RPL32, RPL10, RPL23, RPL9, RPS25, RPS28, RPL24, RPL38, RPL37, RPL28, RPL26L1, RPS23, RPL19</i>                                                                | 14 / 112                                           | 4.7             | 7.78E-06 |
| GO:0001084 | nuclear-transcribed mRNA catabolic process, nonsense-mediated decay      | <i>RPL41, RPL32, RPL10, RPL23, RPL9, RPS25, RPS28, RPL24, RPL38, RPL37, RPL28, RPL26L1, RPS23, RPL19</i>                                                                | 14 / 119                                           | 4.5             | 1.51E-05 |
| GO:0006413 | translational initiation                                                 | <i>RPL41, RPL32, RPL10, RPL23, RPL9, RPS25, RPS28, EIF4E1B, RPL24, RPL38, RPL37, RPL28, RPL26L1, RPS23, RPL19</i>                                                       | 15 / 137                                           | 4.2             | 1.55E-05 |
| GO:0006364 | rRNA processing                                                          | <i>RPL41, RPL32, RPL10, RPL23, ISG20L2, RPL9, WDR55, RPS25, RPS28, RPL24, RPL38, RPL37, RPL28, RPL26L1, RPS23, DIS3L2, RPL19</i>                                        | 17 / 214                                           | 3.0             | 1.80E-04 |
| GO:0006334 | nucleosome assembly                                                      | <i>HIST1H2BN, HIST1H2BM, HIST2H4B, HIST1H2BI, HIST1H2B1, HIST1H2BF, HIST1H1D, HIST1H1E, HIST1H4D, HIST1H2BD, HIST2H2BE, HIST1H1C</i>                                    | 12 / 119                                           | 3.8             | 3.05E-04 |
| GO:0006342 | chromatin silencing                                                      | <i>HIST1H2AM, HIST2H2AA4, HIST3H2A, HIST1H2AE, HIST2H2AB, UBR2, HIST2H2AC</i>                                                                                           | 7 / 45                                             | 5.9             | 1.10E-03 |
| GO:0006412 | translation                                                              | <i>RPL41, RPL32, RPL10, RPL23, RPL9, RPS25, SLC25A18, RPS28, RPL24, RPL38, RPL37, SLC25A45, SLC25A44, RPL28, RPL26L1, RPS23, RPL19</i>                                  | 17 / 253                                           | 2.5             | 1.13E-03 |
| GO:0071480 | cellular response to gamma radiation                                     | <i>XRCC5, NOX4, ATM, CYBA, BCL2L1</i>                                                                                                                                   | 5 / 21                                             | 9.0             | 1.99E-03 |
| GO:0002227 | innate immune response in mucosa                                         | <i>HIST1H2BJ, HIST1H2BI, HIST1H2BF, HIST1H2BD, HIST2H2BE</i>                                                                                                            | 5 / 25                                             | 7.6             | 3.86E-03 |
| GO:0055085 | transmembrane transport                                                  | <i>ABCC4, ABCA2, SLC12A1, ABCB8, ABCB9, ABCG10, TAPBP, TMEM245, SLC25A18, SLC37A4, SLC25A45, OPR1R5, SLC25A44, SLC17A3, ABCG1</i>                                       | 15 / 244                                           | 2.3             | 5.37E-03 |
| GO:0019731 | antibacterial humoral response                                           | <i>HIST1H2BJ, HIST1H2BI, DEFA5, HIST1H2BF, HIST1H2BD, HIST2H2BE</i>                                                                                                     | 6 / 44                                             | 5.2             | 5.76E-03 |
| GO:0005977 | glycogen metabolic process                                               | <i>PPP1CB, PPP1R3C, PHKB, SLC37A4, STK40</i>                                                                                                                            | 5 / 29                                             | 6.5             | 6.68E-03 |
| GO:2000379 | positive regulation of reactive oxygen species metabolic process         | <i>AKR1C3, AGTR1, NOX4, NOX5, TP53</i>                                                                                                                                  | 5 / 30                                             | 6.3             | 7.55E-03 |
| GO:0085532 | histone H3-K27 trimethylation                                            | <i>HIST1H1D, HIST1H1E, HIST1H1C</i>                                                                                                                                     | 3 / 6                                              | 19.0            | 9.67E-03 |
| GO:0045672 | positive regulation of osteoclast differentiation                        | <i>CREB1, CSF1, CA2, PPARC21B</i>                                                                                                                                       | 4 / 19                                             | 9.0             | 1.28E-02 |
| GO:0016584 | nucleosome positioning                                                   | <i>HIST1H1D, HIST1H1E, HIST1H1C</i>                                                                                                                                     | 3 / 8                                              | 14.2            | 1.74E-02 |
| GO:0048013 | ephrin receptor signaling pathway                                        | <i>APH1A, EFN1, CDC42, ACTR2, SDC2, NCK2, ARPC4</i>                                                                                                                     | 7 / 86                                             | 3.1             | 2.59E-02 |
| GO:0046902 | regulation of mitochondrial membrane permeability                        | <i>BAD, TP53, BCL2L1</i>                                                                                                                                                | 3 / 10                                             | 11.4            | 2.70E-02 |
| GO:0046135 | pyrimidine nucleoside catabolic process                                  | <i>NTSC3A, DYPD, NTSM</i>                                                                                                                                               | 3 / 11                                             | 10.3            | 3.25E-02 |
| GO:0033628 | regulation of cell adhesion mediated by integrin                         | <i>EFNA1, TESC, ITGB1BP1</i>                                                                                                                                            | 3 / 11                                             | 10.3            | 3.25E-02 |
| GO:0060315 | negative regulation of nyanidine-sensitive calcium-release channel activ | <i>FKBP1A, CALM3, CLIC2</i>                                                                                                                                             | 3 / 12                                             | 9.5             | 3.83E-02 |
| GO:0015992 | proton transport                                                         | <i>ATP6V0B, ATP6A1, SLC22A13, NOX5, ATP6V0C</i>                                                                                                                         | 5 / 49                                             | 3.9             | 3.96E-02 |
| GO:0045780 | positive regulation of bone resorption                                   | <i>ATP6A1, CA2, PPARC21B</i>                                                                                                                                            | 3 / 13                                             | 8.7             | 4.45E-02 |
| GO:0034097 | response to cytokine                                                     | <i>GNAO1, JUND, AVPR2, LIFR, BCL2L1</i>                                                                                                                                 | 5 / 52                                             | 3.6             | 4.76E-02 |
| GO:0042554 | superoxide anion generation                                              | <i>NOX4, NOX5, CYBA</i>                                                                                                                                                 | 3 / 14                                             | 8.1             | 5.10E-02 |
| GO:0019050 | suppression by virus of host apoptotic process                           | <i>BAD, BCL2L1</i>                                                                                                                                                      | 2 / 2                                              | 37.9            | 5.20E-02 |
| GO:0010672 | regulation of cholesterol esterification                                 | <i>LAMTOR1, ABCG1</i>                                                                                                                                                   | 2 / 2                                              | 37.9            | 5.20E-02 |
| GO:0008286 | insulin receptor signaling pathway                                       | <i>BAIAP2L2, ATP6V0B, ATP6A1, AP3S1, PIK3R1, ATP6V0C</i>                                                                                                                | 6 / 78                                             | 2.9             | 5.47E-02 |
| GO:0030036 | actin cytoskeleton organization                                          | <i>CDC42, DIAPH1, PDPK1, EPB41, RAC2, PIK5K1C, FGD1, PDLIM7</i>                                                                                                         | 8 / 130                                            | 2.3             | 5.62E-02 |
| GO:0006468 | protein phosphorylation                                                  | <i>NEKB, MAP4K2, PDPK1, STRADB, IGFBP3, PHKB, STK19, PIK3R1, MAPK10, CREB1, PHKG1, TAOK3, ATM, MAP3K6, TRIB1, CSNK1G2, STK40, MARK2, MAPK3</i>                          | 19 / 456                                           | 1.6             | 5.71E-02 |
| GO:0080182 | histone H3-K4 trimethylation                                             | <i>HIST1H1D, HIST1H1E, HIST1H1C</i>                                                                                                                                     | 3 / 15                                             | 7.6             | 5.79E-02 |
| GO:0051592 | response to calcium ion                                                  | <i>HOMER1, GDI1, BAD, FCDH15, CALM3</i>                                                                                                                                 | 5 / 58                                             | 3.3             | 6.62E-02 |
| GO:0055114 | oxidation-reduction process                                              | <i>BCKDHA, ABCC4, KDM2A, GDI1, MAOA, GPX6, CYP4F2, AKR1C3, JMJD1C, CYBA, CYB561A3, AKR1C4, CYP17A1, PRDX2, LDHA, NDOR1, SCD2, DYPD, UQCRC1, NOX4, NOX5, ND1, HIF1AN</i> | 23 / 592                                           | 1.5             | 6.63E-02 |
| GO:0007188 | invariant cyclase-modulating G-protein coupled receptor signaling pathwa | <i>GNAO1, AVPR2, GLP2R, CCR3</i>                                                                                                                                        | 4 / 37                                             | 4.1             | 7.29E-02 |
| GO:0016311 | dephosphorylation                                                        | <i>NTSC3A, PPM1A, PIP5K2, NTSM, DUSP15, LPIN3</i>                                                                                                                       | 6 / 86                                             | 2.6             | 7.64E-02 |
| GO:0060154 | cellular process regulating host cell cycle in response to virus         | <i>BAD, BCL2L1</i>                                                                                                                                                      | 2 / 3                                              | 25.3            | 7.69E-02 |
| GO:0070315 | G1 to G0 transition involved in cell differentiation                     | <i>SLC39A5, ZNF503</i>                                                                                                                                                  | 2 / 3                                              | 25.3            | 7.69E-02 |
| GO:0006810 | transport                                                                | <i>ABCA2, PITPNB, GABRA4, SLC12A1, TRPV2, ABCB8, LYVE1, PITPNM1, ASNA1, CLIC2, SLC37A4, SLC25A45, ABCG1, RAB11FIP4, CNGB1</i>                                           | 15 / 348                                           | 1.6             | 7.71E-02 |
| GO:0030225 | macrophage differentiation                                               | <i>CDC42, CSF1, EIF2AK1</i>                                                                                                                                             | 3 / 18                                             | 6.3             | 8.02E-02 |
| GO:0000302 | response to reactive oxygen species                                      | <i>PRDX2, NOX4, NOX5, CYBA</i>                                                                                                                                          | 4 / 39                                             | 3.9             | 8.26E-02 |
| GO:0006303 | double-strand break repair via nonhomologous end joining                 | <i>KDM2A, HIST2H4B, XRCC5, ATM, HIST1H4D</i>                                                                                                                            | 5 / 63                                             | 3.0             | 8.41E-02 |
| GO:0042632 | cholesterol homeostasis                                                  | <i>EHD1, ABCA2, LAMTOR1, SLC37A4, ABCG1</i>                                                                                                                             | 5 / 64                                             | 3.0             | 8.79E-02 |
| GO:0051493 | regulation of cytoskeleton organization                                  | <i>NEXN, MARK2, MAPK3</i>                                                                                                                                               | 3 / 19                                             | 6.0             | 8.81E-02 |
| GO:0046330 | positive regulation of JNK cascade                                       | <i>CDC42, MAP3K2, TAOK3, AVIN1, DUSP15</i>                                                                                                                              | 5 / 65                                             | 2.9             | 9.18E-02 |
| GO:0070588 | calcium ion transmembrane transport                                      | <i>FKBP1A, TRPC4, TRPV2, CACNA2D2, OPRM1, TRPM5, TRPM3</i>                                                                                                              | 7 / 119                                            | 2.2             | 9.44E-02 |
| GO:0009887 | organ morphogenesis                                                      | <i>GAMT, NEKB, TLE2, CDX1, COL9A1, FGD1</i>                                                                                                                             | 6 / 92                                             | 2.5             | 9.54E-02 |

Supplementary table 7. Gene ontology analysis of differentially expressed genes: OB (0w) vs OB (24w). Gene names given in italics.

| GO-term    | Pathway                                                              | Gene symbol                                                                                                                                                                                                                                                                                                                                                                                                                                                                                                                                                                                                       | Number of genes / total number of genes in pathway | Fold enrichment | P-value  |
|------------|----------------------------------------------------------------------|-------------------------------------------------------------------------------------------------------------------------------------------------------------------------------------------------------------------------------------------------------------------------------------------------------------------------------------------------------------------------------------------------------------------------------------------------------------------------------------------------------------------------------------------------------------------------------------------------------------------|----------------------------------------------------|-----------------|----------|
| GO:0006270 | DNA replication initiation                                           | <i>POLA1, MCM7, CCNE2, MCM3, MCM4, MCM6, MCM2</i>                                                                                                                                                                                                                                                                                                                                                                                                                                                                                                                                                                 | 7 / 32                                             | 6.9             | 4.24E-04 |
| GO:0006268 | DNA unwinding involved in DNA replication                            | <i>MCM7, MCM4, MCM6, MCM2</i>                                                                                                                                                                                                                                                                                                                                                                                                                                                                                                                                                                                     | 4 / 10                                             | 12.7            | 3.14E-03 |
| GO:0007399 | nervous system development                                           | <i>CHRM3, BEX1, GDA, ST8SIA2, KIAA2022, KALRN, PCDHA11, TLL1, ATXN3, DLG3, NAGLU, POFU1, ENC1, SPOCK1, EP300, PCDHB4, NRTN, PCDH1, MEI2D</i>                                                                                                                                                                                                                                                                                                                                                                                                                                                                      | 19 / 287                                           | 2.1             | 4.35E-03 |
| GO:0000082 | G1/S transition of mitotic cell cycle                                | <i>TRIM71, POLA1, USP37, MCM7, CCNE2, EIF4EBP1, MCM3, MCM4, MCM6, MCM2</i>                                                                                                                                                                                                                                                                                                                                                                                                                                                                                                                                        | 10 / 102                                           | 3.1             | 4.83E-03 |
| GO:0006351 | transcription, DNA-templated                                         | <i>HIP1, THRA, ZNF491, MED19, YEATS4, ABRA, CCRAR2, ING5, KHSRP, HBP4, WDR5, ZNF568, HIF1AN, MAP3K7, PIAS4, BRD3, TSC22D4, KDM2B, RING1, PRKCB, PPHLN1, ZNF90, MAK, ZNF679, ZNF513, PAD4, ZNF555, JDP2, HMA2, ASF1B, ZNF732, KANK2, KANK1, KHDRBS1, ZBTB42, ZNF22, ZNF7, HDAC7, TCEAL7, ATXN3, TCEAL6, TCEAL5, ZNF876P, CUX1, TCEAL3, TCEAL2, POLR2C, ERBB2, TCEAL1, NOTO, ZNF229, ZNF226, PATZ1, ZNF621, ZNF785, ZNF420, ZSCAN18, ZNF420, HEXIM2, CBX6, TCF7L1, SETD1B, ZNF180, YLPM1, SMAD9, NR1D2, MINA, VAX1, ZNF338, ZBTB6, ZZZ3, ZFP62, NFIC, AGO2, ZNF416, ZNF613, ESF1, POLR3H, INSM1, ZNF775, ZNF257</i> | 82 / 1955                                          | 1.3             | 5.56E-03 |
| GO:0006260 | DNA replication                                                      | <i>ING5, POLA1, MCM7, LIG1, NFIC, MCM3, MCM4, LIG3, SPHAR, MCM6, DTD1, MCM2</i>                                                                                                                                                                                                                                                                                                                                                                                                                                                                                                                                   | 12 / 155                                           | 2.5             | 9.94E-03 |
| GO:0007169 | transmembrane receptor protein tyrosine kinase signaling pathway     | <i>DDR1, NTRK3, ERBB2, CD7, ABL2, NRTN, MET, FRK, MTSS1</i>                                                                                                                                                                                                                                                                                                                                                                                                                                                                                                                                                       | 9 / 96                                             | 3.0             | 1.07E-02 |
| GO:0048627 | negative regulation of insulin receptor signaling pathway            | <i>SOC2, KANK1, SOCS1, PRKCB, TSC1</i>                                                                                                                                                                                                                                                                                                                                                                                                                                                                                                                                                                            | 5 / 29                                             | 5.5             | 1.23E-02 |
| GO:0007568 | aging                                                                | <i>SRR, KRTAP4-9, KRTAP4-8, OGG1, ITGB2, ATP6, CAT, FBXO4, DMD, EEF2, FOXO3, SWCA</i>                                                                                                                                                                                                                                                                                                                                                                                                                                                                                                                             | 12 / 165                                           | 2.3             | 1.53E-02 |
| GO:0051593 | response to folic acid                                               | <i>OGG1, MTHFR, EEF2</i>                                                                                                                                                                                                                                                                                                                                                                                                                                                                                                                                                                                          | 3 / 7                                              | 13.6            | 1.87E-02 |
| GO:0000122 | negative regulation of transcription from RNA polymerase II promoter | <i>KANK2, TERC91, NEDD4L, ZBTB42, FOXO3, RBPJ, GLI3, STRN3, HDAC7, CUX1, UBC, TCEAL1, EP300, HOXA7, FEZF2, ZBTB7A, SNCA, PIAS4, WWTR1, HEXIM2, CBX6, KDM2B, FST, HFE2, MINA, VAX1, EFNA1, YEATS2, NFIC, ZNF613, TCF4, INSM1, JDP2, FRK</i>                                                                                                                                                                                                                                                                                                                                                                        | 34 / 720                                           | 1.5             | 1.97E-02 |
| GO:0009083 | branched-chain amino acid catabolic process                          | <i>MCC1, PPM1K, ACADS, BCAT2</i>                                                                                                                                                                                                                                                                                                                                                                                                                                                                                                                                                                                  | 4 / 19                                             | 6.7             | 2.06E-02 |
| GO:0006355 | regulation of transcription, DNA-templated                           | <i>HIP1, THRA, ZNF491, OGG1, YEATS4, CCRAR2, POFU1, KHSRP, HBP4, EP300, ZNF568, PKNOX1, ENX1, PPHLN1, ZNF90, MAK, PPIE, ZNF79, ZNF13, PAD4, ZNF555, ABCG1, HMA2, ASF1B, ZNF232, KANK1, MAGED1, SRR1, RNF38, ZNF22, ZNF7, HDAC7, PDLIM1, ATXN3, ZNF876P, NOTO, ZNF229, DMD, ZNF226, PATZ1, ZNF621, ZNF785, ZNF420, RNF20, WWTR1, TCF7L1, CDX1, SETD1B, ZNF180, YLPM1, NR1D2, GTF2H3, ZNF338, ZBTB6, ZZZ3, YEATS2, ZFP62, ZNF416, ZNF613, ESF1, ZNF775, ZNF257</i>                                                                                                                                                  | 62 / 1504                                          | 1.3             | 2.33E-02 |
| GO:0007288 | sperm axoneme assembly                                               | <i>SPAG16, PLA2G3, TPGS1</i>                                                                                                                                                                                                                                                                                                                                                                                                                                                                                                                                                                                      | 3 / 8                                              | 11.9            | 2.44E-02 |
| GO:0006283 | transcription-coupled nucleotide-excision repair                     | <i>LIG1, POLR2C, UBC, EP300, PPIE, LIG3, GTF2H3</i>                                                                                                                                                                                                                                                                                                                                                                                                                                                                                                                                                               | 7 / 74                                             | 3.0             | 2.88E-02 |
| GO:0043687 | post-translational protein modification                              | <i>FNKRP, MINA, ARSB, SUMF2</i>                                                                                                                                                                                                                                                                                                                                                                                                                                                                                                                                                                                   | 4 / 22                                             | 5.8             | 3.05E-02 |
| GO:0007010 | cytoskeleton organization                                            | <i>CECR2, FMNL1, TUBB6, HIP1, ZMYM3, PLCE1, PITM2, YEATS4, DMD, OBSL1, CAMSAP1</i>                                                                                                                                                                                                                                                                                                                                                                                                                                                                                                                                | 11 / 161                                           | 2.2             | 3.11E-02 |
| GO:0016567 | protein ubiquitination                                               | <i>WWTR1, FBXO18, RNF38, FBXO25, WWP1, NEDD4L, FBXL15, KLHL3, ASB11, ASB12, FBXO43, KLHL30, FJA1, SOCS2, SOCS1, RAB40C, ASB9, ENG1, FBXO4</i>                                                                                                                                                                                                                                                                                                                                                                                                                                                                     | 19 / 359                                           | 1.7             | 3.54E-02 |
| GO:0001558 | regulation of cell growth                                            | <i>SOCS2, DDR1, KIAA1109, IGFBP3, AGTR1, SPOCK1, PLCE1</i>                                                                                                                                                                                                                                                                                                                                                                                                                                                                                                                                                        | 7 / 80                                             | 2.8             | 4.00E-02 |
| GO:0001933 | negative regulation of protein phosphorylation                       | <i>WWTR1, NTRK3, CD109, IGFBP3, INSM1, SNCA</i>                                                                                                                                                                                                                                                                                                                                                                                                                                                                                                                                                                   | 6 / 61                                             | 3.1             | 4.25E-02 |
| GO:0045892 | negative regulation of transcription, DNA-templated                  | <i>PIAS4, SMARCE1, KHDRBS1, HEXIM2, TSC22D4, THRA, RING1, MAGED1, WWP1, NR1D2, MINA, PTPRK, RBPJ, CCRAR2, GLI3, STRN3, DKK3, TCEAL7, YEATS2, BCL7A, HOXA7, FEZF2, PATZ1, ZBTB7A</i>                                                                                                                                                                                                                                                                                                                                                                                                                               | 24 / 499                                           | 1.5             | 4.38E-02 |
| GO:0006048 | UDP-N-acetylglucosamine biosynthetic process                         | <i>AMDHD2, PGM3, RENBP</i>                                                                                                                                                                                                                                                                                                                                                                                                                                                                                                                                                                                        | 3 / 11                                             | 8.7             | 4.50E-02 |
| GO:0043966 | histone H3 acetylation                                               | <i>ING5, YEATS2, WDR5, ELP4, MAP3K7</i>                                                                                                                                                                                                                                                                                                                                                                                                                                                                                                                                                                           | 5 / 43                                             | 3.7             | 4.54E-02 |
| GO:0008285 | negative regulation of cell proliferation                            | <i>KANK2, DDR1, CGREF1, CDKN2B, KLF13, TECC, IGFBP3, TSC1, PTPRK, ADARB1, RBPJ, GLI3, ING5, FABP3, DLG3, FTH1, CDH13, INSM1, FEZF2, FRK</i>                                                                                                                                                                                                                                                                                                                                                                                                                                                                       | 20 / 396                                           | 1.6             | 4.55E-02 |
| GO:0072661 | protein targeting to plasma membrane                                 | <i>TECC, BSG, ANK3, MYL12A</i>                                                                                                                                                                                                                                                                                                                                                                                                                                                                                                                                                                                    | 4 / 26                                             | 4.9             | 4.70E-02 |
| GO:0007067 | mitotic nuclear division                                             | <i>DCLRE1A, USP37, PLK5, ZWILCH, SMC5, YEATS4, CCSAP, KLHL42, STAG1, WEE1, STAG2, RAD21, FSD1, MAPRE2</i>                                                                                                                                                                                                                                                                                                                                                                                                                                                                                                         | 14 / 248                                           | 1.8             | 5.05E-02 |
| GO:0051301 | cell division                                                        | <i>DCLRE1A, USP37, PLK5, LIG1, ZWILCH, SMC5, LIG3, CCSAP, KLHL42, STAG1, WEE1, STAG2, CCNE2, RAD21, POGZ, MAP4, FSD1, MAPRE2</i>                                                                                                                                                                                                                                                                                                                                                                                                                                                                                  | 18 / 350                                           | 1.6             | 5.13E-02 |
| GO:0014065 | phosphatidylinositol 3-kinase signaling                              | <i>ERBB2, PIK3R2, PIK3R1, NYAP2</i>                                                                                                                                                                                                                                                                                                                                                                                                                                                                                                                                                                               | 4 / 27                                             | 4.7             | 5.17E-02 |
| GO:0035329 | hippo signaling                                                      | <i>WWTR1, AMOTL2, AMOTL1, TJP2</i>                                                                                                                                                                                                                                                                                                                                                                                                                                                                                                                                                                                | 4 / 27                                             | 4.7             | 5.17E-02 |
| GO:0051492 | regulation of stress fiber assembly                                  | <i>TSC1, PIK3R1, SYNP3</i>                                                                                                                                                                                                                                                                                                                                                                                                                                                                                                                                                                                        | 3 / 13                                             | 7.3             | 6.12E-02 |
| GO:0021592 | fourth ventricle development                                         | <i>KDM2B, MYH10</i>                                                                                                                                                                                                                                                                                                                                                                                                                                                                                                                                                                                               | 2 / 2                                              | 31.7            | 6.19E-02 |
| GO:1902856 | negative regulation of nonmotile primary cilium assembly             | <i>MAK, MAP4</i>                                                                                                                                                                                                                                                                                                                                                                                                                                                                                                                                                                                                  | 2 / 2                                              | 31.7            | 6.19E-02 |
| GO:0051012 | microtubule sliding                                                  | <i>SPAG16, MAP4</i>                                                                                                                                                                                                                                                                                                                                                                                                                                                                                                                                                                                               | 2 / 2                                              | 31.7            | 6.19E-02 |
| GO:0007275 | multicellular organism development                                   | <i>CDX1, SIAH3, EMP1, BTBD7, TPGS1, RPS4Y1, WNT16, ZNF7, DKK3, ARVCF, TEF, CUX1, ZMYM3, FES, MAK, ENC1, GNRH2, TLL2, PAEP, ZNF568, CLC, LEFTY2, ZBTB7A, ASF1B</i>                                                                                                                                                                                                                                                                                                                                                                                                                                                 | 24 / 521                                           | 1.5             | 6.43E-02 |
| GO:0006357 | regulation of transcription from RNA polymerase II promoter          | <i>SMARCE1, BRD3, TCF7L1, THRA, PRKCB, MAGED1, UCP1, ELP4, FOXO3, TCEAL7, TCEAL6, TCEAL5, TEF, CUX1, ZMYM3, TCEAL3, TCEAL2, RAD21, TAF4, JDP2, ZSCAN18</i>                                                                                                                                                                                                                                                                                                                                                                                                                                                        | 21 / 441                                           | 1.5             | 6.72E-02 |
| GO:0007625 | grooming behavior                                                    | <i>CTNS, HPR1, ORFP</i>                                                                                                                                                                                                                                                                                                                                                                                                                                                                                                                                                                                           | 3 / 14                                             | 6.8             | 7.00E-02 |
| GO:0031667 | response to nutrient levels                                          | <i>UCP1, CYBA, FOXO3, ACACB</i>                                                                                                                                                                                                                                                                                                                                                                                                                                                                                                                                                                                   | 4 / 31                                             | 4.1             | 7.26E-02 |
| GO:0030100 | regulation of endocytosis                                            | <i>HIP1, RAB4B, CDH13, ABL2</i>                                                                                                                                                                                                                                                                                                                                                                                                                                                                                                                                                                                   | 4 / 31                                             | 4.1             | 7.26E-02 |
| GO:0042542 | response to hydrogen peroxide                                        | <i>ND6, STK25, CAT, HBA2, EEF2</i>                                                                                                                                                                                                                                                                                                                                                                                                                                                                                                                                                                                | 5 / 51                                             | 3.1             | 7.59E-02 |
| GO:0045947 | negative regulation of translational initiation                      | <i>AGO2, EIF4EBP1, EIF4EBP3</i>                                                                                                                                                                                                                                                                                                                                                                                                                                                                                                                                                                                   | 3 / 15                                             | 6.3             | 7.91E-02 |
| GO:0054375 | high-density lipoprotein particle remodeling                         | <i>APOM, PLTP, ABCG1</i>                                                                                                                                                                                                                                                                                                                                                                                                                                                                                                                                                                                          | 3 / 15                                             | 6.3             | 7.91E-02 |
| GO:0046037 | GMP metabolic process                                                | <i>DLG3, GMPR2, TJP2</i>                                                                                                                                                                                                                                                                                                                                                                                                                                                                                                                                                                                          | 3 / 15                                             | 6.3             | 7.91E-02 |
| GO:0070555 | response to interleukin-1                                            | <i>IRAK2, MTHFR, CYBA, SNCA</i>                                                                                                                                                                                                                                                                                                                                                                                                                                                                                                                                                                                   | 4 / 33                                             | 3.8             | 8.42E-02 |
| GO:0006468 | protein phosphorylation                                              | <i>MAP4K2, PLK5, DMPK, PRKCB, STRADB, IGFBP3, PRYAG1, SMAD9, PHKB, STK19, PIK3R1, KALRN, MYLK4, FES, IRAK2, STK25, MAK, ERBB2, ALPK1, PRKACA, FRK</i>                                                                                                                                                                                                                                                                                                                                                                                                                                                             | 21 / 456                                           | 1.5             | 8.48E-02 |
| GO:0007525 | somatic muscle development                                           | <i>NEB, PPP2R3A</i>                                                                                                                                                                                                                                                                                                                                                                                                                                                                                                                                                                                               | 2 / 3                                              | 21.2            | 9.14E-02 |
| GO:1903426 | regulation of reactive oxygen species biosynthetic process           | <i>UCP1, SNCA</i>                                                                                                                                                                                                                                                                                                                                                                                                                                                                                                                                                                                                 | 2 / 3                                              | 21.2            | 9.14E-02 |
| GO:0021678 | third ventricle development                                          | <i>KDM2B, MYH10</i>                                                                                                                                                                                                                                                                                                                                                                                                                                                                                                                                                                                               | 2 / 3                                              | 21.2            | 9.14E-02 |
| GO:0015012 | heparan sulfate proteoglycan biosynthetic process                    | <i>GLCE, NDST3, B3GALT6</i>                                                                                                                                                                                                                                                                                                                                                                                                                                                                                                                                                                                       | 3 / 17                                             | 5.6             | 9.84E-02 |

**Supplementary table 8.** Gene ontology analysis of differentially expressed genes: OB (0w) vs OB (52w). The GO-terms colored in green are mentioned in the text. Gene names given in *italics*.

| GO-term    | Pathway                                                                           | Gene symbol                                                                                                                                                                                                                                                                                                                                                                                                                             | Number of genes / total number of genes in pathway | Fold enrichment | P-value  |
|------------|-----------------------------------------------------------------------------------|-----------------------------------------------------------------------------------------------------------------------------------------------------------------------------------------------------------------------------------------------------------------------------------------------------------------------------------------------------------------------------------------------------------------------------------------|----------------------------------------------------|-----------------|----------|
| GO:0005977 | glycogen metabolic process                                                        | <i>PPP1R1A, PPP1R3B, PPP1R3E, PPP1R3D, PPP1R2P3, PRKAG2, PHKB, PYGL, SLC37A4, STK40</i>                                                                                                                                                                                                                                                                                                                                                 | 10 / 29                                            | 5.3             | 6.19E-05 |
| GO:0006468 | protein phosphorylation                                                           | <i>TP53RK, CCNH, MAST2, PRKAG2, MYLK4, RPS6KA3, RPS6KA5, PKA, SCYL2, PRKG1, MAP4K2, CHUK, MMD, STRADB, PRKCD, DAPK3, ERN1, FGR, BCR, MAPKAPK2, FASTKD5, SGK1, STK40, GUCY2D, PIK3R1, NLK, KALRN, AURKA, MAPK8, NUAQ2, GRK4, ERBB2, STK38, STK38L, CSK, MAPK6, LYN, MAP3K2, SRPK3, CDK19, DMPK, LIMK1, SMAD5, PHKB, MERTK, BCKDK, MAPK10, PINK1, CDK7, FES, STK25, AAK1</i>                                                              | 52 / 456                                           | 1.8             | 1.08E-04 |
| GO:0034976 | response to endoplasmic reticulum stress                                          | <i>ERO1A, XBP1, FAM129A, TXNDC11, ATP2A1, PIK3R2, PIK3R1, PARK2, ERN1, ERP44, DDRGK1, CREB3L2, UBQLN1, NRBF2, ATF4</i>                                                                                                                                                                                                                                                                                                                  | 15 / 75                                            | 3.1             | 3.01E-04 |
| GO:0007050 | cell cycle arrest                                                                 | <i>KHDRBS1, PRNP, CDKN2B, CDC123, CAB39, CUL3, STRADB, AK1, PRKAG2, DHCR24, VASH1, MLF1, PML, UHMK1, ERN1, PPM1A, CDK7, PCBP4, RRAGB, IRF1, LAMTOR1, MAP2K6</i>                                                                                                                                                                                                                                                                         | 22 / 141                                           | 2.4             | 3.10E-04 |
| GO:0006915 | apoptotic process                                                                 | <i>PLEKHF1, PPP1R13B, SH3KBP1, ITGB2, APIP, CIB1, ARRB1, LITAF, CASP14, RPS6KA3, WDR92, ADAMTSL4, RASSF5, CASP4, PEA15, CASP1, CTSC, HTATIP2, AREL1, APAF1, PRKCD, DAPK3, AXIN1, MUL1, FBXO10, ZDHHC16, TRAP, NISCH, TRAF3, IRF1, CDIP1, MAL, CH3L1, FAM32A, SGK1, S100A9, S100A8, BIRC3, MCM2, BEX2, FAM188A, NUAQ2, RNF216, RAD21, CD14, RNF30, SMNDC1, SNCA, MAP2K6, TIGAR, BAD, STAT1, SIAH3, DHCR24, PML, ACTO1, LCN2, GIAPIN1</i> | 58 / 567                                           | 1.6             | 7.05E-04 |
| GO:0070059 | intrinsic apoptotic signaling pathway in response to endoplasmic reticulum stress | <i>ERN1, ERO1A, XBP1, APAF1, CASP4, TM6IM6, ATP2A1, PML, ATF4</i>                                                                                                                                                                                                                                                                                                                                                                       | 9 / 33                                             | 4.2             | 1.01E-03 |
| GO:0000209 | protein polyubiquitination                                                        | <i>PSMD12, DTX3L, SMURF1, CUL3, UBR2, MARCH5, PARK2, PSMB9, DDB2, RNF41, PSMA5, ZNRF1, NPEPPS, PSMD7, HECTD2, PSMD2, UBR5, MKRN1, PSME4, FBXO6, UBE2V1, LONRF1, ASB2, TRIM21</i>                                                                                                                                                                                                                                                        | 24 / 184                                           | 2.0             | 1.97E-03 |
| GO:0015671 | oxygen transport                                                                  | <i>HBM, HBG2, HBG1, HBB, HBA2, HBD</i>                                                                                                                                                                                                                                                                                                                                                                                                  | 6 / 15                                             | 6.1             | 2.00E-03 |
| GO:0043161 | proteasome-mediated ubiquitin-dependent protein catabolic process                 | <i>PSMD12, CUL3, RNF38, ARRB1, RNF6, FBXO45, PARK2, ZNRF1, PSMD7, RNF216, KATS, PSMD2, CDC26, TBL1X, EDEM3, SMURF1, SIAH3, AXIN1, WWP1, KCTD5, RAD23B, PML, PSMB9, PSMA5, PSME4</i>                                                                                                                                                                                                                                                     | 25 / 203                                           | 1.9             | 3.34E-03 |
| GO:0016567 | protein ubiquitination                                                            | <i>CUL3, RNF38, ARRB1, FBXO45, ASB11, DCAF5, DTY4, ASB18, BACH1, PARK2, RNF135, VCPBP1, RAB40C, TRIM28, FBXO7, RNF130, TRIM21, DCAF1, DCAF1, ETRB18, MUL1, WWP1, LMO7, FBXO32, FBXO10, MID2, FBXO30, TRAP, RNF168, SH3BP2, PINK1, KLHL5, NEURL2, TRAF3, NEDD4, ASB5, PDZRN4, BIRC3</i>                                                                                                                                                  | 38 / 359                                           | 1.6             | 3.79E-03 |
| GO:0005975 | carbohydrate metabolic process                                                    | <i>CHD1, GUSBP11, ST8SIA1, IDH3G, SLC2A3, PYGL, BPGM, NAGPA, KIAA1161, GALT, LDHB, LDHA, FGGY, ALDH2, MAN2A2, AMDHD2, MLEC, ST3GAL5, CH3L1, GLA, GALK2, LDHAL6A</i>                                                                                                                                                                                                                                                                     | 22 / 174                                           | 1.9             | 4.58E-03 |
| GO:0031648 | protein destabilization                                                           | <i>XBP1, CCDC88C, MUL1, TRIM21, PARK2, ISOC2, NOMO2, SNCA</i>                                                                                                                                                                                                                                                                                                                                                                           | 8 / 35                                             | 3.5             | 6.54E-03 |
| GO:0006342 | chromatin silencing                                                               | <i>HIST1H2AM, HIST2H2AA4, HIST3H2A, H2AFZ, HIST1H2AK, HIST1H2AE, HIST2H2AB, UBR2, HIST1H2AC</i>                                                                                                                                                                                                                                                                                                                                         | 9 / 45                                             | 3.1             | 7.84E-03 |
| GO:0001867 | complement activation, lectin pathway                                             | <i>FCN3, KRT1, MASP2, MASP1</i>                                                                                                                                                                                                                                                                                                                                                                                                         | 4 / 7                                              | 8.8             | 7.89E-03 |
| GO:0035556 | intracellular signal transduction                                                 | <i>DDX3X, GUCY2D, CAB39, DGKA, MAST2, PSEN2, PRKAG2, ASB11, NLK, ASB18, KALRN, ADCY7, RPS6KA3, RPS6KA5, NUAQ2, RASSF5, STK38, STK38L, GPR155, POLR2M, MAP4K2, MAP3K3, SMAD4, PRKCD, DAPK3, BCR, PINK1, TYROBP, NEURL2, PPP1R1A, NRG4, PPP1R1C, PRKCO, ASB5, ASB2, SGK1, PLCD1, SIPA1, RAPGEF3, GCOM1</i>                                                                                                                                | 40 / 403                                           | 1.5             | 8.57E-03 |
| GO:0033209 | tumor necrosis factor-mediated signaling pathway                                  | <i>PSMD12, TNFRSF6B, STAT1, COMM7, PSMB9, TNFRSF13B, TNFRSF1A, PSMA5, PSMD7, TRAF3, PSMD2, TNFSF4, PSME4, CD27, CDIP1, BIRC3</i>                                                                                                                                                                                                                                                                                                        | 16 / 118                                           | 2.1             | 9.60E-03 |
| GO:1903076 | regulation of protein localization to plasma membrane                             | <i>VAMPB, KALRN, GBP1, VTI1B</i>                                                                                                                                                                                                                                                                                                                                                                                                        | 4 / 8                                              | 7.7             | 1.20E-02 |
| GO:1903204 | negative regulation of oxidative stress-induced neuron death                      | <i>PINK1, FBXO7, ATF4</i>                                                                                                                                                                                                                                                                                                                                                                                                               | 3 / 3                                              | 15.3            | 1.21E-02 |
| GO:0046320 | regulation of fatty acid oxidation                                                | <i>FABP3, PDK4, PRKAG2</i>                                                                                                                                                                                                                                                                                                                                                                                                              | 3 / 3                                              | 15.3            | 1.21E-02 |
| GO:0090141 | positive regulation of mitochondrial fission                                      | <i>PINK1, MUL1, DDHD1, MARCH5, PARK2</i>                                                                                                                                                                                                                                                                                                                                                                                                | 5 / 15                                             | 5.1             | 1.37E-02 |
| GO:0010508 | positive regulation of autophagy                                                  | <i>XBP1, PLEKHF1, BAD, TP53INP2, PIK3CB, TRIM21, MID2, MTDH</i>                                                                                                                                                                                                                                                                                                                                                                         | 8 / 40                                             | 3.1             | 1.37E-02 |
| GO:0051865 | protein autoubiquitination                                                        | <i>TRIM71, UBE2T, RNF8, TRIM21, MARCH5, RNF141, PARK2, RNF41, DDB2</i>                                                                                                                                                                                                                                                                                                                                                                  | 9 / 50                                             | 2.8             | 1.47E-02 |
| GO:0031647 | regulation of protein stability                                                   | <i>KHDRBS1, DPM2, XBP1, RNF128, SIAH3, USP3, MUL1, ORSL1, FBXO7, PARK2, AURKA</i>                                                                                                                                                                                                                                                                                                                                                       | 11 / 70                                            | 2.4             | 1.47E-02 |
| GO:0060333 | interferon-gamma-mediated signaling pathway                                       | <i>STAT1, IFNGR2, IRF1, PRKCD, IRF2, HLA-C, NMI, IFI30, TRIM21, GBP1, PML</i>                                                                                                                                                                                                                                                                                                                                                           | 11 / 71                                            | 2.4             | 1.62E-02 |
| GO:0006853 | carnitine shuttle                                                                 | <i>CPT1A, PRKAG2, SLC25A20, ACAGB</i>                                                                                                                                                                                                                                                                                                                                                                                                   | 4 / 9                                              | 6.8             | 1.72E-02 |
| GO:0090244 | Wnt signaling pathway involved in somitogenesis                                   | <i>RGS19, AXIN1, PPP2R3A, LRP6</i>                                                                                                                                                                                                                                                                                                                                                                                                      | 4 / 9                                              | 6.8             | 1.72E-02 |
| GO:0071353 | cellular response to interleukin-4                                                | <i>ALAD, XBP1, TUBA1B, CORO1A, PML, MCM2</i>                                                                                                                                                                                                                                                                                                                                                                                            | 4 / 24                                             | 3.8             | 1.74E-02 |
| GO:0031623 | receptor internalization                                                          | <i>CALCR1, CXCR1, GRK4, NEDD4, ITGB2, CLTC, CD9, SNCA</i>                                                                                                                                                                                                                                                                                                                                                                               | 8 / 43                                             | 2.9             | 2.00E-02 |
| GO:0045727 | positive regulation of translation                                                | <i>UCN, PINK1, DDX3X, SERP1, DDX39B, ERBB2, CIRBP, FAM129A, RBMS3</i>                                                                                                                                                                                                                                                                                                                                                                   | 9 / 53                                             | 2.6             | 2.04E-02 |
| GO:0042997 | negative regulation of Golgi to plasma membrane protein transport                 | <i>LYPLA1, PKDC8, CSK</i>                                                                                                                                                                                                                                                                                                                                                                                                               | 3 / 4                                              | 11.5            | 2.33E-02 |
| GO:0001771 | immunological synapse formation                                                   | <i>DOCK8, NCK2, DOCK2, CORO1A</i>                                                                                                                                                                                                                                                                                                                                                                                                       | 4 / 10                                             | 6.1             | 2.34E-02 |
| GO:0009615 | response to virus                                                                 | <i>IFNAR2, IFITM2, DDX3X, BTBD17, CHUK, IFNGR2, ODC1, ZC3HAV1, IFIT3, IFIT2, IFIH1, FGR, TNFSF4, LCN2</i>                                                                                                                                                                                                                                                                                                                               | 14 / 110                                           | 2.0             | 2.64E-02 |
| GO:0006979 | response to oxidative stress                                                      | <i>UCN, PRNP, ABCG2, SRXN1, TAT, KRT1, DHCR24, PARK2, POLM1, ALAD, PINK1, ALS2, STK25, HAO1</i>                                                                                                                                                                                                                                                                                                                                         | 14 / 110                                           | 2.0             | 2.64E-02 |
| GO:0010800 | positive regulation of peptidyl-threonine phosphorylation                         | <i>CAB39, EGF, AXIN1, CH3L1, PRKAG2, CALM1</i>                                                                                                                                                                                                                                                                                                                                                                                          | 6 / 27                                             | 3.4             | 2.82E-02 |
| GO:0014065 | phosphatidylinositol 3-kinase signaling                                           | <i>XBP1, ERBB2, PIK3R2, PIK3CB, PIK3R1, NYAP2</i>                                                                                                                                                                                                                                                                                                                                                                                       | 6 / 27                                             | 3.4             | 2.82E-02 |
| GO:0070534 | protein K63-linked ubiquitination                                                 | <i>RNF168, UBE2T, NEDD4, PIK3C2, UBE2V1, PARK2</i>                                                                                                                                                                                                                                                                                                                                                                                      | 7 / 37                                             | 2.9             | 3.08E-02 |
| GO:0046777 | protein autophosphorylation                                                       | <i>LYN, DDR1, MAP3K3, MYLK2, DAPK3, PRKX, NLK, AURKA, UHMK1, ERN1, BCR, FGR, TRIM28, FES, STK25, MAPKAPK2, ERBB2, AAK1, CSK</i>                                                                                                                                                                                                                                                                                                         | 19 / 172                                           | 1.7             | 3.14E-02 |
| GO:0006357 | regulation of transcription from RNA polymerase II promoter                       | <i>ZNF305, EHY2, TSHZ3, THRA, MAGED1, CITED4, FOXK2, UBP1, ARID4B, CHD3, TRAK1, LITAF, TCEAL6, DBP, TCEAL5, ZMYM3, TCEAL3, ZNF704, RAD21, TBL1Y, ZNF446, GTF2IRD2B, ZNF641, PKNOX2, HTATIP2, ZSCAN18, IFNAR2, KDM4C, ZSCAN5B, ARID5A, ELP2, SNF8, FOXP4, FOXN1, TFDP1, TFDP2, LPIN1, NFKBID, ATF4, VGLL3</i>                                                                                                                            | 40 / 441                                           | 1.4             | 3.19E-02 |
| GO:0035666 | TRIF-dependent toll-like receptor signaling pathway                               | <i>CHUK, TRAF3, LY96, CD14, TANK, BIRC3</i>                                                                                                                                                                                                                                                                                                                                                                                             | 6 / 28                                             | 3.3             | 3.25E-02 |
| GO:0007528 | neuromuscular junction development                                                | <i>CHRNA1, ALS2, HEDD4, ERBB2, CACNA2D2, COL4A5</i>                                                                                                                                                                                                                                                                                                                                                                                     | 6 / 28                                             | 3.3             | 3.25E-02 |
| GO:0006513 | protein monoubiquitination                                                        | <i>UBE2T, CUL3, NEDD4, UBE2O, TRIM21, PARK2</i>                                                                                                                                                                                                                                                                                                                                                                                         | 6 / 28                                             | 3.3             | 3.25E-02 |
| GO:0070373 | negative regulation of ERK1 and ERK2 cascade                                      | <i>LYN, ERFF1, XBP1, SMAD4, DUSP3, CSK, ARRB1, VRK3, GBP1</i>                                                                                                                                                                                                                                                                                                                                                                           | 9 / 58                                             | 2.4             | 3.33E-02 |
| GO:0036498 | IRE1-mediated unfolded protein response                                           | <i>ERN1, DNAJC3, SEC61A1, XBP1, SERP1, CXXC1, SRPRB, HDGF, EXTL3</i>                                                                                                                                                                                                                                                                                                                                                                    | 9 / 59                                             | 2.3             | 3.64E-02 |
| GO:0071407 | cellular response to organic cyclic compound                                      | <i>RAP1B, P2RY6, SLC16A1, RGS19, STAT1, P2RY1, IL18, AXIN1, SMAD9</i>                                                                                                                                                                                                                                                                                                                                                                   | 9 / 59                                             | 2.3             | 3.64E-02 |
| GO:0043456 | regulation of pentose phosphate shunt                                             | <i>TIGAR, PCAM2, BPGM</i>                                                                                                                                                                                                                                                                                                                                                                                                               | 3 / 5                                              | 9.2             | 3.71E-02 |
| GO:1900103 | positive regulation of endoplasmic reticulum unfolded protein response            | <i>ERN1, XBP1, PIK3R1</i>                                                                                                                                                                                                                                                                                                                                                                                                               | 3 / 5                                              | 9.2             | 3.71E-02 |
| GO:0010637 | negative regulation of mitochondrial fusion                                       | <i>MUL1, OMA1, PARK2</i>                                                                                                                                                                                                                                                                                                                                                                                                                | 3 / 5                                              | 9.2             | 3.71E-02 |
| GO:0015833 | peptide transport                                                                 | <i>TAP1, ABCB9, DISP1</i>                                                                                                                                                                                                                                                                                                                                                                                                               | 3 / 5                                              | 9.2             | 3.71E-02 |
| GO:0010981 | negative regulation of SMAD protein complex assembly                              | <i>PPM1A, PMP2A, LIDL, RADA4</i>                                                                                                                                                                                                                                                                                                                                                                                                        | 3 / 5                                              | 9.2             | 3.71E-02 |
| GO:0051583 | dopamine active involved in synaptic transmission                                 | <i>SLC6A2, PARK2, SNCA</i>                                                                                                                                                                                                                                                                                                                                                                                                              | 3 / 5                                              | 9.2             | 3.71E-02 |
| GO:0044314 | protein K27-linked ubiquitination                                                 | <i>UBE2T, RNF6, PARK2</i>                                                                                                                                                                                                                                                                                                                                                                                                               | 3 / 5                                              | 9.2             | 3.71E-02 |
| GO:0001887 | selenium compound metabolic process                                               | <i>TXNRD1, SCLY, SEPHS2</i>                                                                                                                                                                                                                                                                                                                                                                                                             | 3 / 5                                              | 9.2             | 3.71E-02 |
| GO:0006389 | lactate metabolic process                                                         | <i>LDHB, LDHA, MIF, LDHAL6A</i>                                                                                                                                                                                                                                                                                                                                                                                                         | 3 / 5                                              | 9.2             | 3.71E-02 |
| GO:1901985 | positive regulation of protein acetylation                                        | <i>XBP1, KATS, RAPGEF3</i>                                                                                                                                                                                                                                                                                                                                                                                                              | 3 / 5                                              | 9.2             | 3.71E-02 |
| GO:0045746 | negative regulation of Notch signaling pathway                                    | <i>MEG3, DLX1, HEY1, BCL6, NUMB, DLK1</i>                                                                                                                                                                                                                                                                                                                                                                                               | 6 / 29                                             | 3.2             | 3.73E-02 |
| GO:0042981 | regulation of apoptotic process                                                   | <i>BNIP3L, BEX2, PPP1R13B, MSTN, APAF1, STAT1, MAGED1, DAPK3, FBXO10, ETS1, TNFRSF1A, BCL6, TRAF3, RASSF5, CASP4, PEA15, CASP1, CARD16, SGK1, BIRC3, ZNF420, BCL2L1</i>                                                                                                                                                                                                                                                                 | 22 / 213                                           | 1.6             | 3.77E-02 |
| GO:0014070 | response to organic cyclic compound                                               | <i>LYN, ABCG4, CPT1A, ND1, PLIN2, SLC37A4, ACACB, ACAT1</i>                                                                                                                                                                                                                                                                                                                                                                             | 8 / 49                                             | 2.5             | 3.81E-02 |
| GO:0080394 | negative regulation of pathway-restricted SMAD protein phosphorylation            | <i>XBP1, PMP2A, LIDL, RADA4, ENG</i>                                                                                                                                                                                                                                                                                                                                                                                                    | 4 / 12                                             | 5.1             | 3.89E-02 |
| GO:0055008 | cardiac muscle tissue morphogenesis                                               | <i>EGLN1, MYLK2, ACTO1, TTN</i>                                                                                                                                                                                                                                                                                                                                                                                                         | 4 / 12                                             | 5.1             | 3.89E-02 |
| GO:0042787 | protein ubiquitination involved in ubiquitin-dependent protein catabolic process  | <i>AREL1, SMURF1, SIAH3, CUL3, WWP1, FBXO45, FBXO10, PARK2, AURKA, HERC4, RNF128, HECTD2, CDC26, NEDD4, UBR5, ASB2, FBXO7</i>                                                                                                                                                                                                                                                                                                           | 17 / 153                                           | 1.7             | 4.09E-02 |
| GO:0010506 | regulation of autophagy                                                           | <i>XBP1, RRAGB, DAPK3, CASP1, PIP4K2A, PIK3R2, NRBF2, PARK2</i>                                                                                                                                                                                                                                                                                                                                                                         | 8 / 50                                             | 2.5             | 4.19E-02 |
| GO:0002474 | antigen processing and presentation of peptide antigen via MHC class II           | <i>SEC24A, SAR1B, TAP2, HLA-C, TAP1, ABCB9</i>                                                                                                                                                                                                                                                                                                                                                                                          | 6 / 30                                             | 3.1             | 4.24E-02 |
| GO:0050729 | positive regulation of inflammatory response                                      | <i>CDK19, TNFSF4, IL18, LPL, S100A12, ETS1, S100A9, LDLR, S100A8, TNFRSF1A</i>                                                                                                                                                                                                                                                                                                                                                          | 10 / 73                                            | 2.1             | 4.67E-02 |
| GO:0045765 | regulation of angiogenesis                                                        | <i>EGLN1, WARS, ERBB2, KRT1, ETS1, HTATIP2</i>                                                                                                                                                                                                                                                                                                                                                                                          | 6 / 31                                             | 4.0             | 4.80E-02 |
| GO:0010972 | carboxylic acid metabolic process                                                 | <i>LDHB, LDHA, MIF, LDHAL6A</i>                                                                                                                                                                                                                                                                                                                                                                                                         | 4 / 13                                             | 4.7             | 4.81E-02 |
| GO:0045088 | regulation of innate immune response                                              | <i>RNF135, FGR, IRF1, BIRC3</i>                                                                                                                                                                                                                                                                                                                                                                                                         | 4 / 13                                             | 4.7             | 4.81E-02 |
| GO:0001817 | regulation of cytokine production                                                 | <i>LYN, TRAF3, CSK, LITAF</i>                                                                                                                                                                                                                                                                                                                                                                                                           | 4 / 13                                             | 4.7             | 4.81E-02 |
| GO:0055114 | oxidation-reduction process                                                       | <i>ERO1A, ALDH1L1, MTRR, SRXN1, NDUFA10, TXNDC12, IFI30, CYB561D2, SH3PX2A, FTH1, FDXR, OSOX1, DHRS4L2, LBR, HTATIP2, ABCG4, SORD, HSD11B1L, CYB561A3, CYP27A1, POR, ASPH, SC02, ALDH1A2, KIAA1456, GFOD2, ND1, GMPR2, HSD17B14, HSD17B8, FOXRED1, LDHB, LDHA, HSD17B1, SNCA, CYP2J2, EGLN1, HSD3B7, KDM4C, RNLS, TXNRD1, TXNL1, GSR, AKR1C3, AKR1C2, DHCR24, DHRS7, NDUFAF5, ALDH8A1, LDHAL6A</i>                                      | 50 / 592                                           | 1.3             | 4.92E-02 |
| GO:0045087 | innate immune response                                                            | <i>DDX3X, NLRCS, LY96, IL27, ZC3HAV1, CORO1A, IFIH1, RNF135, TRIM28, CLEC7A, CASP4, S100A12, CSK, CD14, TRIM21, CHD1, LYN, MAP4K2, APOBEC3C, CHUK, SH2D1B, HLA-C, MIF, MID2, PML, FGR, IGLL5, TYROBP, FES, ELF4, TRAF3, LCN2, CD300E, PAD4, CD46, S100A9, LGR4, S100A8</i>                                                                                                                                                              | 38 / 430                                           | 1.4             | 4.97E-02 |

|            |                                                                               |                                                                                                                                                                                                                                                                                                                                                                                                                                                                                                                                 |          |     |          |
|------------|-------------------------------------------------------------------------------|---------------------------------------------------------------------------------------------------------------------------------------------------------------------------------------------------------------------------------------------------------------------------------------------------------------------------------------------------------------------------------------------------------------------------------------------------------------------------------------------------------------------------------|----------|-----|----------|
| GO:0006511 | ubiquitin-dependent protein catabolic process                                 | USP48, XBP1, USP38, USP6, CUL3, USP3, USP11, USP12, RNF8, RNF6, UCHL3, FBXO32, UCHL5, RNF168, PINK1, NPL0C4, TP53INP2, UBR5, FBXO7                                                                                                                                                                                                                                                                                                                                                                                              | 19 / 182 | 1.6 | 5.02E-02 |
| GO:0042472 | inner ear morphogenesis                                                       | BCR, PRRX1, INSG1, CHD7, FOX11, OTX1, SOBP, HMX2                                                                                                                                                                                                                                                                                                                                                                                                                                                                                | 8 / 52   | 2.4 | 5.03E-02 |
| GO:0050727 | regulation of inflammatory response                                           | LYN, IL20, BCL6, TNFSF4, CASP4, CASP1, NR1D2, PIK3A1, BIRC3                                                                                                                                                                                                                                                                                                                                                                                                                                                                     | 9 / 63   | 2.2 | 5.08E-02 |
| GO:0090002 | establishment of protein localization to plasma membrane                      | TSPAN14, EFR3A, JUP, TSPAN5, EFR3B, FAM126A, TNFRSF1A                                                                                                                                                                                                                                                                                                                                                                                                                                                                           | 7 / 42   | 2.6 | 5.30E-02 |
| GO:0002489 | presentation of endogenous peptide antigen via MHC class II via ER p          | TAP2, TAP1, ABCB9                                                                                                                                                                                                                                                                                                                                                                                                                                                                                                               | 3 / 6    | 7.7 | 5.33E-02 |
| GO:0032237 | activation of store-operated calcium channel activity                         | STIM1, ASPH, TMEM110                                                                                                                                                                                                                                                                                                                                                                                                                                                                                                            | 3 / 6    | 7.7 | 5.33E-02 |
| GO:0002485 | presentation of endogenous peptide antigen via MHC class I via ER p           | TAP2, TAP1, ABCB9                                                                                                                                                                                                                                                                                                                                                                                                                                                                                                               | 3 / 6    | 7.7 | 5.33E-02 |
| GO:0002591 | regulation of antigen processing and presentation of peptide antigen via M    | TAP2, TAP1, ABCB9                                                                                                                                                                                                                                                                                                                                                                                                                                                                                                               | 3 / 6    | 7.7 | 5.33E-02 |
| GO:0042632 | cholesterol homeostasis                                                       | EHD1, XBP1, FABP3, IL18, LPL, LAMTOR1, SLC37A4, LDLR, ABCG1                                                                                                                                                                                                                                                                                                                                                                                                                                                                     | 9 / 64   | 2.2 | 5.49E-02 |
| GO:0030512 | negative regulation of transforming growth factor beta receptor signaling pat | PPM1A, XBP1, CHST11, SMURF1, HTRA4, PMEPA1, LDLRAD4, MTMR4, ENG                                                                                                                                                                                                                                                                                                                                                                                                                                                                 | 9 / 64   | 2.2 | 5.49E-02 |
| GO:0008299 | isoprenoid biosynthetic process                                               | IDI1, COQ2, ID2, ISPFD                                                                                                                                                                                                                                                                                                                                                                                                                                                                                                          | 4 / 14   | 4.4 | 5.84E-02 |
| GO:0001678 | cellular glucose homeostasis                                                  | HKDC1, PIK3R2, CARTPT, PIK3R1                                                                                                                                                                                                                                                                                                                                                                                                                                                                                                   | 4 / 14   | 4.4 | 5.84E-02 |
| GO:0018105 | peptide-serine phosphorylation                                                | DMPK, CAB39, MAST2, PRKCD, PRKX, VRK3, UHMK1, PINK1, MAPK8, STK38, MAPKAPK2, STK38L, PRKCG, SGK1                                                                                                                                                                                                                                                                                                                                                                                                                                | 14 / 125 | 1.7 | 6.32E-02 |
| GO:0050790 | regulation of catalytic activity                                              | DPM2, DMPK, BAG2, PPP1R3B, RCAN2, PRKAG2, PPP2R3A, SGK1, TTN                                                                                                                                                                                                                                                                                                                                                                                                                                                                    | 9 / 66   | 2.1 | 6.37E-02 |
| GO:0090090 | negative regulation of canonical Wnt signaling pathway                        | TLE2, PSMD12, RGS19, CUL3, AXIN1, PRICKLE1, PPP2R3A, MLLT3, PARK2, PSMB9, LRP6, PSMA5, PSMD7, PSMD2, PSME4, LZTS2, SCYL2                                                                                                                                                                                                                                                                                                                                                                                                        | 17 / 163 | 1.6 | 6.56E-02 |
| GO:0006412 | translation                                                                   | COA1, WARS, DHPS, MRPL27, RPL36A, MRPL34, GTF2H3, MRPS6, SLC25A37, COPSS5, SLC25A39, RPL18A, SLC25A19, UCP3, AGO2, SLC25A10, RPS2, SLC25A20, RPS11, CPEB2, SLC25A44, RPL28, FARSB, RPL19                                                                                                                                                                                                                                                                                                                                        | 24 / 253 | 1.5 | 6.58E-02 |
| GO:0006006 | glucose metabolic process                                                     | NISCH, CPT1A, SERP1, SORD, PDK4, OMA1, BPGM, SLC37A4, PGM2L1                                                                                                                                                                                                                                                                                                                                                                                                                                                                    | 9 / 67   | 2.1 | 6.84E-02 |
| GO:0042993 | positive regulation of transcription factor import into nucleus               | XBP1, TRIM28, PIK3R2, PIK3R1                                                                                                                                                                                                                                                                                                                                                                                                                                                                                                    | 4 / 15   | 4.1 | 6.96E-02 |
| GO:0045948 | positive regulation of translational initiation                               | KHDRBS1, CDC123, DDX3X, UHMK1                                                                                                                                                                                                                                                                                                                                                                                                                                                                                                   | 4 / 15   | 4.1 | 6.96E-02 |
| GO:1904707 | positive regulation of vascular smooth muscle cell proliferation              | ERN1, XBP1, DDX39B, MMP9                                                                                                                                                                                                                                                                                                                                                                                                                                                                                                        | 4 / 15   | 4.1 | 6.96E-02 |
| GO:0001964 | start response                                                                | UCN, CYP2, P4R1, BRWD                                                                                                                                                                                                                                                                                                                                                                                                                                                                                                           | 4 / 15   | 4.1 | 6.96E-02 |
| GO:0030968 | endoplasmic reticulum unfolded protein response                               | ERO1A, EDEM3, XBP1, SERP1, CREB3L2, EDEM2, AARS                                                                                                                                                                                                                                                                                                                                                                                                                                                                                 | 7 / 45   | 2.4 | 7.00E-02 |
| GO:0014894 | response to denervation involved in regulation of muscle adaptation           | CASO1, MTMR4, FBXO32                                                                                                                                                                                                                                                                                                                                                                                                                                                                                                            | 3 / 7    | 6.6 | 7.14E-02 |
| GO:1903077 | negative regulation of protein localization to plasma membrane                | CLTC, NUMB, GBP1                                                                                                                                                                                                                                                                                                                                                                                                                                                                                                                | 3 / 7    | 6.6 | 7.14E-02 |
| GO:0070233 | negative regulation of T cell apoptotic process                               | DOCK8, CD27, PRKCG                                                                                                                                                                                                                                                                                                                                                                                                                                                                                                              | 3 / 7    | 6.6 | 7.14E-02 |
| GO:0006032 | chitin catabolic process                                                      | CHID1, CHBL1, CTBS                                                                                                                                                                                                                                                                                                                                                                                                                                                                                                              | 3 / 7    | 6.6 | 7.14E-02 |
| GO:0010890 | positive regulation of sequestering of triglyceride                           | LPL, OSBP1L1, PLIN5                                                                                                                                                                                                                                                                                                                                                                                                                                                                                                             | 3 / 7    | 6.6 | 7.14E-02 |
| GO:0070050 | neuron cellular homeostasis                                                   | CHRNA1, FGGY, PARK2                                                                                                                                                                                                                                                                                                                                                                                                                                                                                                             | 3 / 7    | 6.6 | 7.14E-02 |
| GO:0002481 | binding and presentation of exogenous protein antigen via MHC class II        | TAP2, TAP1, ABCB9                                                                                                                                                                                                                                                                                                                                                                                                                                                                                                               | 3 / 7    | 6.6 | 7.14E-02 |
| GO:0046689 | response to mercury ion                                                       | ALAD, TAT, PGM2                                                                                                                                                                                                                                                                                                                                                                                                                                                                                                                 | 3 / 7    | 6.6 | 7.14E-02 |
| GO:0007049 | cell cycle                                                                    | LIN54, BEX2, CDC123, LIN37, PRKCD, CHTF18, USP39, AURKA, PTP4A1, RPS8KA3, CCPG1, PPP1R1C, C1NP, CDK2AP1, FAM32A, EZF3, MAPK6, EVI5, TRIM21, MCM2, AVP11                                                                                                                                                                                                                                                                                                                                                                         | 21 / 217 | 1.5 | 7.34E-02 |
| GO:0032922 | circadian regulation of gene expression                                       | PER1, MAGED1, CRY2, CARTPT, LGR4, PML, ATF4, CIART                                                                                                                                                                                                                                                                                                                                                                                                                                                                              | 8 / 57   | 2.2 | 7.55E-02 |
| GO:2001235 | positive regulation of apoptotic signaling pathway                            | ING5, APAF1, MAGED1, PRKCD, CTSC                                                                                                                                                                                                                                                                                                                                                                                                                                                                                                | 5 / 25   | 3.1 | 7.58E-02 |
| GO:0002223 | stimulatory C-type lectin receptor signaling pathway                          | LYN, PSMA5, PSMD12, PSMD7, RPS8KA5, CHUK, CLEC7A, PSMD2, PRKCD, PSME4, UBE2V1, PSMB9                                                                                                                                                                                                                                                                                                                                                                                                                                            | 12 / 105 | 1.8 | 7.95E-02 |
| GO:0051592 | response to calcium ion                                                       | HOMER1, BAD, NEDD4, KCNMA1, FGG, PCDH15, CALM1, TTN                                                                                                                                                                                                                                                                                                                                                                                                                                                                             | 8 / 58   | 2.1 | 8.13E-02 |
| GO:0035269 | protein O-linked mannosylation                                                | DPM2, BAGAT1, ISP, POMGNT2                                                                                                                                                                                                                                                                                                                                                                                                                                                                                                      | 4 / 16   | 3.8 | 8.16E-02 |
| GO:1902187 | negative regulation of viral release from host cell                           | TRIM28, TRIM21, MID2, PML                                                                                                                                                                                                                                                                                                                                                                                                                                                                                                       | 4 / 16   | 3.8 | 8.16E-02 |
| GO:0051642 | centrosome localization                                                       | NIN, ASUN, SYNE2, AURKA                                                                                                                                                                                                                                                                                                                                                                                                                                                                                                         | 4 / 16   | 3.8 | 8.16E-02 |
| GO:0032418 | lysosome localization                                                         | BLOC1S1, BLOC1S2, HPS8, LAMTOR1                                                                                                                                                                                                                                                                                                                                                                                                                                                                                                 | 4 / 16   | 3.8 | 8.16E-02 |
| GO:0009409 | response to cold                                                              | TAP2, TAP1, ABCB9, METRN1                                                                                                                                                                                                                                                                                                                                                                                                                                                                                                       | 6 / 36   | 2.6 | 8.19E-02 |
| GO:0098869 | cellular oxidant detoxification                                               | GSTZ1, SRXN1, TXNRD1, SESN2, GSR, TXNL1, HBB, HBA2, S100A9                                                                                                                                                                                                                                                                                                                                                                                                                                                                      | 9 / 70   | 2.0 | 8.39E-02 |
| GO:0045944 | positive regulation of transcription from RNA polymerase II promoter          | UCN, DDX3X, THRA, CCNH, CITED4, CHD7, SLC40A1, FOXJ1, MED19, SCX, ARRB1, ARID4B, BACH1, ETS1, PARK2, RPS8KA3, RPS8KA5, DBP, KAT5, HEY1, TRIM28, CREB3L2, KPNAB, NCK2, CCN2, HOXA7, FEZF2, CHUK, H2AFZ, NCOA3, ZBTB38, IL18, RFX3, TNFRSF1A, NPAS4, MED25, TFDP1, TFDP2, ELF4, FR2, IRF1, RFX4, IRF2, MET, ATF4, ENG, BEX1, NLRCS, FOXK2, GATAS, PIK3R2, PIK3R1, LRP6, IFT74, NHLH2, RAD21, PRRY1, OTX1, TBL1X, EGLN1, CDKN2B, XBP1, SMAD4, PRRX1, CDX1, STAT1, ESRRG, GRHL2, PML, PER1, CDK7, COPSS5, CCPG1, AGO2, ZNF913, LRW1 | 76 / 981 | 1.2 | 8.43E-02 |
| GO:0046854 | phosphatidylinositol phosphorylation                                          | EFR3A, NRG4, IMPA2, EGF, ERBB2, PIP4K2A, PIK3R2, PIK3CB, PIK3R1, EFR3B, FAM126A                                                                                                                                                                                                                                                                                                                                                                                                                                                 | 11 / 94  | 1.8 | 8.47E-02 |
| GO:0071260 | cellular response to mechanical stimulus                                      | MAP3K2, MAG, MAPK6, BAD, IRF1, CASP1, SCX, ENG, TNFRSF1A                                                                                                                                                                                                                                                                                                                                                                                                                                                                        | 9 / 71   | 1.9 | 8.94E-02 |
| GO:0051898 | negative regulation of protein kinase B signaling                             | LMBRD1, MSTN, MULL1, CIB1, LEMD6, PHLD3                                                                                                                                                                                                                                                                                                                                                                                                                                                                                         | 6 / 37   | 2.5 | 8.98E-02 |
| GO:0090263 | positive regulation of canonical Wnt signaling pathway                        | PSMD12, JUP, DAPK3, AXIN1, PPP2R3A, PSMB9, LRP6, PSMA5, PSMD7, PSMD2, UBR5, PSME4, LGR4                                                                                                                                                                                                                                                                                                                                                                                                                                         | 13 / 120 | 1.7 | 9.08E-02 |
| GO:0085020 | protein K6-linked ubiquitination                                              | UBE2T, RNF6, PARK2                                                                                                                                                                                                                                                                                                                                                                                                                                                                                                              | 3 / 8    | 5.8 | 9.12E-02 |
| GO:1903214 | regulation of protein targeting to mitochondrion                              | BNIP3L, PINK1, PARK2                                                                                                                                                                                                                                                                                                                                                                                                                                                                                                            | 3 / 8    | 5.8 | 9.12E-02 |
| GO:0090277 | positive regulation of peptide hormone secretion                              | RASL10B, TFR2, FGG                                                                                                                                                                                                                                                                                                                                                                                                                                                                                                              | 3 / 8    | 5.8 | 9.12E-02 |
| GO:0001766 | membrane raft polarization                                                    | CMTM8, MAL, DOCK2                                                                                                                                                                                                                                                                                                                                                                                                                                                                                                               | 3 / 8    | 5.8 | 9.12E-02 |
| GO:0042587 | amyloid precursor protein catabolic process                                   | PSEN2, DMCOR1A, ABCG1                                                                                                                                                                                                                                                                                                                                                                                                                                                                                                           | 3 / 8    | 5.8 | 9.12E-02 |
| GO:0042102 | positive regulation of T cell proliferation                                   | TNFSF4, DHPS, NCK2, PRKCG, LILRB2, CD46, CORO1A, TNFSF13B                                                                                                                                                                                                                                                                                                                                                                                                                                                                       | 8 / 60   | 2.0 | 9.36E-02 |
| GO:0032728 | positive regulation of interferon-beta production                             | IFIH1, RNF135, DDX3X, IRF1, ZC3H4V1                                                                                                                                                                                                                                                                                                                                                                                                                                                                                             | 5 / 27   | 2.8 | 9.51E-02 |
| GO:0042752 | regulation of circadian rhythm                                                | MAPK10, PER1, MAPK9, MAGED1, CRY2, NR1D2, PML                                                                                                                                                                                                                                                                                                                                                                                                                                                                                   | 7 / 49   | 2.2 | 9.69E-02 |
| GO:0008625 | extrinsic apoptotic signaling pathway via death domain receptors              | DDX3X, BAD, BLOC1S2, CD27, PIK3R1, TNFRSF1A                                                                                                                                                                                                                                                                                                                                                                                                                                                                                     | 6 / 38   | 2.4 | 9.82E-02 |
| GO:0030049 | muscle filament sliding                                                       | ACTC1, DES, MYH3, MYBPC2, NEB, TTN                                                                                                                                                                                                                                                                                                                                                                                                                                                                                              | 6 / 38   | 2.4 | 9.82E-02 |
| GO:0007257 | activation of JUN kinase activity                                             | ERN1, MAP3K2, MAP4K2, DBNL, AXIN1, MULL1                                                                                                                                                                                                                                                                                                                                                                                                                                                                                        | 6 / 38   | 2.4 | 9.82E-02 |
| GO:0050900 | leukocyte migration                                                           | LYN, SLC16A1, ITGA3, ITGB2, PIK3R2, PIK3CB, PIK3R1, MIF, MERTK, MMP9, MAG, SLC7A7, SIRPA                                                                                                                                                                                                                                                                                                                                                                                                                                        | 13 / 122 | 1.6 | 9.96E-02 |

Supplementary table 9. Gene ontology analysis: differentially expressed genes affected by DNA methylation (52 w). The GO-terms colored in green are depicted in the go plot in fig.4b

| GO-term    | Pathway                                                                                                 | Gene symbol                                                                                                                                                                                                                                                                                                                                                                                  | Number of genes / total number of genes in pathway | Fold enrichment | P-value |
|------------|---------------------------------------------------------------------------------------------------------|----------------------------------------------------------------------------------------------------------------------------------------------------------------------------------------------------------------------------------------------------------------------------------------------------------------------------------------------------------------------------------------------|----------------------------------------------------|-----------------|---------|
| GO:0006468 | protein phosphorylation                                                                                 | GUCY2D, TP53RK, CDNH, MAST2, PRKAG2, PK3R1, NLK, KALRN, MYLK4, MAPK8, RPS6KA5, GRK4, STK38, PDK4, STK38L, CSK, PRKG1, LYN, MAPAK2, CDK19, DMPK, MMD, STRADB, LIMK1, SMAD9, PKB8, MERTK, FGR, ERN1, BCR, FNK1, FES, STK25, MAPKAPK2, AAK1, SGK1, STK40                                                                                                                                        | 37 / 456                                           | 2.4             | 1.6E-06 |
| GO:0005977 | glycogen metabolic process                                                                              | PPP1R1A, PPP1R3B, PPP1R3E, PPP1R3D, PRKAG2, PHK8, PYGL, SLC37A4, STK40                                                                                                                                                                                                                                                                                                                       | 9 / 29                                             | 9.3             | 3.3E-06 |
| GO:0034976 | response to endoplasmic reticulum stress                                                                | ERN1, ERP44, CREB3L2, FAM129A, UBQLN1, TXNDC11, PK3R2, ATP2A1, PK3R1, PARK2, ATF4                                                                                                                                                                                                                                                                                                            | 11 / 75                                            | 4.4             | 1.8E-04 |
| GO:0007050 | cell cycle arrest                                                                                       | CDKN2B, CAB39, CUL3, STRADB, AK1, PRKAG2, DHCR24, VASHT, PML, ERN1, PPM1A, IRF1, LAMTOR1, MAP2K6                                                                                                                                                                                                                                                                                             | 14 / 141                                           | 3.0             | 8.7E-04 |
| GO:0035556 | intracellular signal transduction                                                                       | GUCY2D, CAB39, DGKA, MAST2, PRKAG2, NLK, ASB18, KALRN, ADCY7, RPS6KA5, RASSF5, STK38, STK38L, GPR155, POLR2M, MAPAK2, MAP3K3, BCR, FNK1, PPP1R1A, PRKCO, ASB5, ASB2, SGK1, SIPA1, RAPGEF3, GCOM1                                                                                                                                                                                             | 27 / 403                                           | 2.0             | 1.1E-03 |
| GO:0006853 | carriane shuttle                                                                                        | CPT1A, PRKAG2, SLC25A20, ACACB                                                                                                                                                                                                                                                                                                                                                               | 4 / 9                                              | 13.3            | 2.7E-03 |
| GO:0031623 | receptor internalization                                                                                | CXCR1, GRK4, NEDD4, ITGB2, CLTC, CDB, SNCA                                                                                                                                                                                                                                                                                                                                                   | 7 / 43                                             | 4.9             | 2.8E-03 |
| GO:0046320 | regulation of fatty acid oxidation                                                                      | FABP3, PDK4, PRKAG2                                                                                                                                                                                                                                                                                                                                                                          | 3 / 3                                              | 30.0            | 3.2E-03 |
| GO:0002029 | protein polyubiquitination                                                                              | DTX3L, SMURF1, CUL3, PARK2, PSMB9, DOB2, RNF41, ZNF1, NPEPPS, PSDM2, UBR5, PSME4, UBE2V1, LONRF1, ASB2                                                                                                                                                                                                                                                                                       | 15 / 184                                           | 2.4             | 3.5E-03 |
| GO:0050900 | leukocyte migration                                                                                     | LYN, MAG, SLC7A7, SLC16A1, ITGB2, SIRPA, PK3R2, PK3CB, PK3R1, MERTK, MMP9                                                                                                                                                                                                                                                                                                                    | 11 / 122                                           | 2.7             | 7.6E-03 |
| GO:0043161 | proteasome-mediated ubiquitin-dependent protein catabolic process                                       | SMURF1, SIAH3, CUL3, AXIN1, WWP1, ARRB1, KCTD5, RAD23B, PARK2, PML, PSMB9, ZNF1, RNF216, PSDM2, PSME4                                                                                                                                                                                                                                                                                        | 15 / 203                                           | 2.2             | 8.2E-03 |
| GO:0018105 | peptidyl-serine phosphorylation                                                                         | PINK1, MAPK8, DMPK, CAB39, MAST2, STK38, MAPKAPK2, STK38L, PRKCO, SGK1, VRK3                                                                                                                                                                                                                                                                                                                 | 11 / 125                                           | 2.6             | 9.0E-03 |
| GO:0010991 | negative regulation of SMAD protein complex assembly                                                    | PPM1A, PMPA1, LDLRAD4                                                                                                                                                                                                                                                                                                                                                                        | 3 / 5                                              | 18.0            | 1.0E-02 |
| GO:0010800 | positive regulation of peptidyl-threonine phosphorylation                                               | CAB39, EGF, AXIN1, PRKAG2, CALM1                                                                                                                                                                                                                                                                                                                                                             | 5 / 27                                             | 5.6             | 1.2E-02 |
| GO:0009202 | establishment of protein localization to plasma membrane                                                | EFRA3, JIP, TSPAN6, EFR3B, LIM26A, TNFSF1A                                                                                                                                                                                                                                                                                                                                                   | 6 / 42                                             | 4.3             | 1.2E-02 |
| GO:0046777 | protein autophosphorylation                                                                             | LYN, DDR1, MAP3K3, MYLK2, NLK, ERN1, BCR, FGR, FES, STK25, MAPKAPK2, AAK1, CSK                                                                                                                                                                                                                                                                                                               | 13 / 172                                           | 2.3             | 1.3E-02 |
| GO:0016192 | vesicle-mediated transport                                                                              | NSF, RAB10, ACTR1A, AP1G1, FNBP1, SAR1B, CLTC, NCK2, SPIRE1, KALRN, PARK2, VTI1B                                                                                                                                                                                                                                                                                                             | 12 / 152                                           | 2.4             | 1.3E-02 |
| GO:0046854 | phosphatidylinositol phosphorylation                                                                    | EFRA3, IMA2, EGF, PIP4K2A, PK3R2, PK3CB, PK3R1, EFR3B, FAM126A                                                                                                                                                                                                                                                                                                                               | 9 / 94                                             | 2.9             | 1.3E-02 |
| GO:0006513 | protein monoubiquitination                                                                              | UBE2T, CUL3, NEDD4, UBE2O, PARK2                                                                                                                                                                                                                                                                                                                                                             | 5 / 28                                             | 5.4             | 1.3E-02 |
| GO:0030168 | platelet activation                                                                                     | LYN, C6ORF25, DGKA, FGG, CD9, PRKCO, ARRB1, PK3CB, PK3R1, MERTK                                                                                                                                                                                                                                                                                                                              | 10 / 115                                           | 2.6             | 1.5E-02 |
| GO:0032237 | activation of store-operated calcium channel activity                                                   | STIM1, ASPH, TMEM110                                                                                                                                                                                                                                                                                                                                                                         | 3 / 6                                              | 15.0            | 1.5E-02 |
| GO:0030512 | negative regulation of transforming growth factor beta receptor signaling pathway                       | PPM1A, CHST11, SMURF1, HTRA4, PMPA1, LDLRAD4, ENG                                                                                                                                                                                                                                                                                                                                            | 7 / 64                                             | 3.3             | 1.9E-02 |
| GO:0031398 | positive regulation of protein ubiquitination                                                           | PINK1, RASSF5, AXIN1, UBQLN1, ARRB1, PRICKLE1, BIRC3                                                                                                                                                                                                                                                                                                                                         | 7 / 64                                             | 3.3             | 1.9E-02 |
| GO:0071901 | negative regulation of protein serine/threonine kinase activity                                         | CDKN2B, PRKAG2, CB1, LRP6                                                                                                                                                                                                                                                                                                                                                                    | 4 / 18                                             | 6.7             | 2.1E-02 |
| GO:0070050 | neuron cellular homeostasis                                                                             | CHRNA1, FOGY, PARK2                                                                                                                                                                                                                                                                                                                                                                          | 3 / 7                                              | 12.9            | 2.1E-02 |
| GO:0001867 | complement activation, lectin pathway                                                                   | FCMB, KR71, MASP1                                                                                                                                                                                                                                                                                                                                                                            | 3 / 7                                              | 12.9            | 2.1E-02 |
| GO:0014070 | response to organic cyclic compound                                                                     | LYN, ABCC4, CPT1A, SLC37A4, ACACB, ACAT1                                                                                                                                                                                                                                                                                                                                                     | 6 / 49                                             | 3.7             | 2.5E-02 |
| GO:0070059 | intrinsic apoptotic signaling pathway in response to endoplasmic reticulum stress                       | ERN1, TMEM6, ATP2A1, PML, ATF4                                                                                                                                                                                                                                                                                                                                                               | 5 / 33                                             | 4.5             | 2.3E-02 |
| GO:0008285 | negative regulation of cell proliferation                                                               | LYN, DDR1, MEK3, CDKN2B, WARS, TESC, DHCR24, CB1, ETS1, PML, RNF41, FABP3, BCL6, RASSF5, IRF1, ALDH1A2, FTH1, NCK2, CD9, CSK, GSOX1, FEZF2                                                                                                                                                                                                                                                   | 22 / 396                                           | 1.7             | 2.5E-02 |
| GO:0051865 | protein autoubiquitination                                                                              | TRIM71, UBE2T, RNF141, PARK2, RNF41, DOB2                                                                                                                                                                                                                                                                                                                                                    | 6 / 50                                             | 3.6             | 2.5E-02 |
| GO:0007165 | signal transduction                                                                                     | ARRB1, PK3CB, TNFSF13B, IMA2, NKIRAS2, NCK2, PRKGI, FGG, AXIN1, PPP2R5A, FAM126A, TNFRSF1A, BCR, APBB1P, TRAF3, FEZ2, RN3, PPP1R12B, MAPRE2, RAPGEF3, NSMAF, CHRNA1, CSF2RB, PK3R2, PK3R1, KALRN, CD79B, GRK4, SPOCK2, SPOCK1, MAP2K6, CAPZ, LYN, JUP, EGF, TXNRD1, LIMK1, WWP1, ARHGAP28, ARHGAP26, NR2F9, GRN2D, ARHGAP32, CLON6, ARHGAP30, GNAL, PPP1R1A, STK25, HDGF, ASB2, LRP12, SIPA1 | 52 / 1161                                          | 1.3             | 2.6E-02 |
| GO:1903214 | regulation of protein targeting to mitochondrion                                                        | BNIP3L, PINK1, PARK2                                                                                                                                                                                                                                                                                                                                                                         | 3 / 8                                              | 11.2            | 2.7E-02 |
| GO:1903076 | regulation of protein localization to plasma membrane                                                   | KALRN, GBP1, VTI1B                                                                                                                                                                                                                                                                                                                                                                           | 3 / 8                                              | 11.2            | 2.7E-02 |
| GO:0034097 | response to cytokine                                                                                    | STAT1, ALDH1A2, MAPKAPK2, L6R, PML, BCL2L1                                                                                                                                                                                                                                                                                                                                                   | 6 / 52                                             | 3.5             | 2.9E-02 |
| GO:0030036 | actin cytoskeleton organization                                                                         | NISCH, BCR, BCL6, EPB41, LIMK1, SPIRE1, DOCK2, ARHGAP26, PRKGI, PDLIM7                                                                                                                                                                                                                                                                                                                       | 10 / 130                                           | 2.3             | 3.0E-02 |
| GO:0005975 | carbohydrate metabolic process                                                                          | GALC, FGGY, GUSBP11, ST8SIA1, AMDHD2, MLEC, ST3GAL5, PYGL, NAGPA, KIAA1161, GALK2, LDHAL6A                                                                                                                                                                                                                                                                                                   | 12 / 174                                           | 2.1             | 3.1E-02 |
| GO:0016567 | protein ubiquitination                                                                                  | SMURF1, CUL3, WWP1, ARRB1, DCAF5, DTX4, FBXO32, ASB18, BACH1, PARK2, SHRF2, PINK1, RAB40C, KLHL5, TRAF3, NEDD4, ASB5, RNF130, PDZRN4, BIRC3                                                                                                                                                                                                                                                  | 20 / 359                                           | 1.7             | 3.2E-02 |
| GO:0070534 | protein K63-linked ubiquitination                                                                       | UBE2T, NEDD4, UBE2O, UBE2V1, PARK2                                                                                                                                                                                                                                                                                                                                                           | 5 / 37                                             | 4.1             | 3.4E-02 |
| GO:0038095 | Fc-epsilon receptor signaling pathway                                                                   | LYN, MAPK8, PSDM2, PSME4, PK3R2, PRKCO, GAB2, UBE2V1, PK3CB, PK3R1, CALM1, PSMB9                                                                                                                                                                                                                                                                                                             | 12 / 178                                           | 2.0             | 3.6E-02 |
| GO:0007173 | epidermal growth factor receptor signaling pathway                                                      | RPS6KA5, FES, EGF, NCK2, CSK, PK3R1                                                                                                                                                                                                                                                                                                                                                          | 6 / 56                                             | 3.2             | 3.8E-02 |
| GO:0045944 | positive regulation of transcription from RNA polymerase II promoter                                    | CDNH4, CHD7, NLRCS5, GATA5, FOXK2, ARRB1, ARID4B, PK3R2, PK3R1, ETS1, BACH1, PARK2, LRP6, RPS6KA5, RAD21, CREB3L2, KPNAB, NCK2, OTX1, HOXA7, FEZF2, EGLN1, CDKN2B, PRRX1, CDX1, STAT1, ZBTB36, RFX3, ESRRG, GRHL2, PML, TNFRSF1A, MED25, COPRS5, ITDP1, COPS1, IFR2, IRF1, RFX4, IRF2, AGO2, LPN1, ATF4, ENG                                                                                 | 44 / 981                                           | 1.3             | 3.9E-02 |
| GO:0071388 | cellular response to fatty acid                                                                         | CPT1A, XRC3S, PDK4, LDLR                                                                                                                                                                                                                                                                                                                                                                     | 4 / 23                                             | 5.2             | 4.0E-02 |
| GO:0001771 | immunological synapse formation                                                                         | DOCK8, NCK2, DOCK2                                                                                                                                                                                                                                                                                                                                                                           | 3 / 10                                             | 9.0             | 4.2E-02 |
| GO:0051272 | positive regulation of cellular component movement                                                      | LYN, BCL6, ETS1                                                                                                                                                                                                                                                                                                                                                                              | 3 / 10                                             | 9.0             | 4.2E-02 |
| GO:0038083 | peptidyl-tyrosine autophosphorylation                                                                   | LYN, FGR, DDR1, FES, CSK                                                                                                                                                                                                                                                                                                                                                                     | 5 / 40                                             | 3.7             | 4.3E-02 |
| GO:0070373 | negative regulation of ERK1 and ERK2 cascade                                                            | LYN, DUSP3, CSK, ARRB1, VRK3, GBP1                                                                                                                                                                                                                                                                                                                                                           | 6 / 58                                             | 3.1             | 4.3E-02 |
| GO:0033209 | tumor necrosis factor-mediated signaling pathway                                                        | TNFRSF6B, TRAF3, STAT1, PSDM2, PSME4, TNFSF13B, PSMB9, BIRC3, TNFRSF1A                                                                                                                                                                                                                                                                                                                       | 9 / 118                                            | 2.3             | 4.3E-02 |
| GO:0007596 | blood coagulation                                                                                       | LYN, EHD1, GGXC, HBG2, C6ORF25, DOCK8, RF1, FGG, IRF2, GATA5, ANO6, SERPNA5                                                                                                                                                                                                                                                                                                                  | 12 / 184                                           | 2.0             | 4.4E-02 |
| GO:0036498 | IRE1-mediated unfolded protein response                                                                 | ERN1, DNJC3, SEC61A1, SERP1, HDGF, EXTL3                                                                                                                                                                                                                                                                                                                                                     | 6 / 59                                             | 3.0             | 4.6E-02 |
| GO:0016579 | protein deubiquitination                                                                                | USP48, USP38, COPRS5, WDR48, USP3, USP12, UCHL3, USP39                                                                                                                                                                                                                                                                                                                                       | 8 / 99                                             | 2.4             | 4.7E-02 |
| GO:0001933 | negative regulation of protein phosphorylation                                                          | LYN, FAM129A, CB1, PARK2, LRP6, SNCA                                                                                                                                                                                                                                                                                                                                                         | 6 / 61                                             | 2.9             | 5.2E-02 |
| GO:0000082 | G1/S transition of mitotic cell cycle                                                                   | TRIM71, CDNH, CUL3, MCM4, MCM5, EIF4E, GSP11, MCM2                                                                                                                                                                                                                                                                                                                                           | 8 / 102                                            | 2.4             | 5.4E-02 |
| GO:0060394 | negative regulation of pathway-restricted SMAD protein phosphorylation                                  | PMPA1, LDLRAD4, ENG                                                                                                                                                                                                                                                                                                                                                                          | 3 / 12                                             | 7.5             | 5.9E-02 |
| GO:0042574 | retinal metabolic process                                                                               | ALDH1A2, AKR1C3, ALDH8A1                                                                                                                                                                                                                                                                                                                                                                     | 3 / 12                                             | 7.5             | 5.9E-02 |
| GO:0098779 | mitochondria in response to mitochondrial depolarization                                                | PINK1, SMURF1, PARK2                                                                                                                                                                                                                                                                                                                                                                         | 3 / 12                                             | 7.5             | 5.9E-02 |
| GO:0014065 | phosphatidylinositol 3-kinase signaling                                                                 | PK3R2, PK3CB, PK3R1, NYAP2                                                                                                                                                                                                                                                                                                                                                                   | 4 / 27                                             | 4.4             | 5.9E-02 |
| GO:0006470 | protein dephosphorylation                                                                               | PPM1A, PTPRE, PDP2, MYH3, PPM1L, PPP1R3B, PPP1R3D, CPPED1, LHPP                                                                                                                                                                                                                                                                                                                              | 9 / 126                                            | 2.1             | 6.0E-02 |
| GO:0042632 | cholesterol homeostasis                                                                                 | EHD1, FABP3, LAMTOR1, SLC37A4, LDLR, ABCG1                                                                                                                                                                                                                                                                                                                                                   | 6 / 64                                             | 2.8             | 6.2E-02 |
| GO:0001934 | positive regulation of protein phosphorylation                                                          | RAP2A, PINK1, FAM129A, AXIN1, CDK2AP1, CB1, ARRB1, MMP9, ENG                                                                                                                                                                                                                                                                                                                                 | 9 / 127                                            | 2.1             | 6.2E-02 |
| GO:0055114 | oxidation-reduction process                                                                             | ALDH1L1, MTRR, NDUFA10, HSD17B8, CYB5E1D2, SH3XD2A, FTH1, OSQX1, LBR, SNCA, EGLN1, ABCC4, KDM4C, RNLS, TXNRD1, TXNL1, GSR, AKR1C3, HSD17B1, DHCR24, CYP27A1, POR, ASPH, ALDH1A2, NDUFA5, GFOD2, ALDH8A1, LDHAL6A                                                                                                                                                                             | 28 / 592                                           | 1.4             | 6.2E-02 |
| GO:0043388 | positive regulation of DNA binding                                                                      | EGF, CALM1, MMP9, PARK2                                                                                                                                                                                                                                                                                                                                                                      | 4 / 28                                             | 4.3             | 6.5E-02 |
| GO:0010872 | regulation of cholesterol esterification                                                                | LAMTOR1, ABCG1                                                                                                                                                                                                                                                                                                                                                                               | 2 / 2                                              | 30.0            | 6.5E-02 |
| GO:0050992 | dimethylallyl diphosphate biosynthetic process                                                          | ID1, ID2                                                                                                                                                                                                                                                                                                                                                                                     | 2 / 2                                              | 30.0            | 6.5E-02 |
| GO:0009240 | isopentenyl diphosphate biosynthetic process                                                            | ID1, ID2                                                                                                                                                                                                                                                                                                                                                                                     | 2 / 2                                              | 30.0            | 6.5E-02 |
| GO:0001817 | regulation of cytokine production                                                                       | LYN, TRAF3, CSK                                                                                                                                                                                                                                                                                                                                                                              | 3 / 13                                             | 6.9             | 6.8E-02 |
| GO:0045088 | regulation of innate immune response                                                                    | FGR, IRF1, BIRC3                                                                                                                                                                                                                                                                                                                                                                             | 3 / 13                                             | 6.9             | 6.8E-02 |
| GO:0050790 | regulation of catalytic activity                                                                        | DPM2, DMPK, BAG2, PPP1R3B, PRKAG2, SGK1                                                                                                                                                                                                                                                                                                                                                      | 6 / 66                                             | 2.7             | 6.8E-02 |
| GO:0015031 | protein transport                                                                                       | ENY2, PKDCC, RAB5C, LMAN2L, PK3R2, ARRB1, ABCB9, SCAMP2, ARCN1, KTN1, SEC61A1, C16ORF62, AP5M1, SERP1, RAB36, CHMP1B, SPIRE1, EXOC6, SLC15A4, TMED5                                                                                                                                                                                                                                          | 20 / 395                                           | 1.5             | 7.0E-02 |
| GO:0042787 | protein ubiquitination involved in ubiquitin-dependent protein catabolic process                        | HERC4, AREL1, SMURF1, SIAH3, CUL3, NEDD4, UBR5, WWP1, ASB2, PARK2                                                                                                                                                                                                                                                                                                                            | 10 / 153                                           | 2.0             | 7.0E-02 |
| GO:0007163 | establishment or maintenance of cell polarity                                                           | CRB1, STK25, SYNE2, CAP2                                                                                                                                                                                                                                                                                                                                                                     | 4 / 29                                             | 4.1             | 7.1E-02 |
| GO:0048812 | neuron projection morphogenesis                                                                         | KIRREL3, DBNL, ZSWIME, NYAP2, SGK1                                                                                                                                                                                                                                                                                                                                                           | 5 / 48                                             | 3.1             | 7.5E-02 |
| GO:0042573 | retinoic acid metabolic process                                                                         | SCPEP1, ALDH1A2, ALDH8A1                                                                                                                                                                                                                                                                                                                                                                     | 3 / 14                                             | 6.4             | 7.7E-02 |
| GO:0008299 | isoprenoid biosynthetic process                                                                         | ID1, ID2, ISPP                                                                                                                                                                                                                                                                                                                                                                               | 3 / 14                                             | 6.4             | 7.7E-02 |
| GO:0041148 | behavioral response to cocaine                                                                          | HOMER1, KALRN, SNCA                                                                                                                                                                                                                                                                                                                                                                          | 3 / 14                                             | 6.4             | 7.7E-02 |
| GO:0009513 | detection of calcium ion                                                                                | STIM1, ASPH, CALM1                                                                                                                                                                                                                                                                                                                                                                           | 3 / 14                                             | 6.4             | 7.7E-02 |
| GO:0051056 | regulation of small GTPase mediated signal transduction                                                 | RAP1GAP2, BCR, ARHGAP32, ARHGAP30, PK3R2, ARHGAP28, ARHGAP26, KALRN, SIPA1                                                                                                                                                                                                                                                                                                                   | 9 / 134                                            | 2.0             | 7.9E-02 |
| GO:0042147 | retrograde transport, endosome to Golgi                                                                 | CLTC, UBE2O, DENND5A, EVI5, CLN5, VTI1B                                                                                                                                                                                                                                                                                                                                                      | 6 / 69                                             | 2.6             | 8.0E-02 |
| GO:0045765 | regulation of angiogenesis                                                                              | EGLN1, WARS, KRT1, ETS1                                                                                                                                                                                                                                                                                                                                                                      | 4 / 31                                             | 3.9             | 8.3E-02 |
| GO:1904707 | positive regulation of vascular smooth muscle cell proliferation                                        | ERN1, DDX39B, MMP9                                                                                                                                                                                                                                                                                                                                                                           | 3 / 15                                             | 6.0             | 8.7E-02 |
| GO:0001953 | negative regulation of cell-matrix adhesion                                                             | BCL6, PK3R1, HOXA7                                                                                                                                                                                                                                                                                                                                                                           | 3 / 15                                             | 6.0             | 8.7E-02 |
| GO:0090141 | positive regulation of mitochondrial fission                                                            | PINK1, DDHD1, PARK2                                                                                                                                                                                                                                                                                                                                                                          | 3 / 15                                             | 6.0             | 8.7E-02 |
| GO:2000060 | positive regulation of protein ubiquitination involved in ubiquitin-dependent protein catabolic process | SMURF1, EGF, AXIN1                                                                                                                                                                                                                                                                                                                                                                           | 3 / 15                                             | 6.0             | 8.7E-02 |
| GO:0060333 | interferon-gamma-mediated signaling pathway                                                             | STAT1, IFNGR2, IRF1, IRF2, GBP1, PML                                                                                                                                                                                                                                                                                                                                                         | 6 / 71                                             | 2.5             | 8.8E-02 |
| GO:0006974 | cellular response to DNA damage stimulus                                                                | LYN, TIGAR, DTX3L, BCL6, UBE2T, ZBTB38, UBR5, MAPKAPK2, PSME4, SUSD6, CB1, SGK1                                                                                                                                                                                                                                                                                                              | 12 / 208                                           | 1.8             | 8.9E-02 |
| GO:0042127 | regulation of cell proliferation                                                                        | FGR, TNFRSF6B, JUP, CHST11, BCL6, FES, CSK, CB1, SGK1, ENG, TNFRSF1A                                                                                                                                                                                                                                                                                                                         | 11 / 185                                           | 1.8             | 9.1E-02 |
| GO:0043547 | positive regulation of GTPase activity                                                                  | DOCK8, ARRB1, CSF2RB, PK3R2, KALRN, ADAP2, NCK2, DENND5A, RAP1GAP2, FNBP1, EGF, HPS1, AXIN1, ARHGAP28, ARHGAP26, GRN2D, BCR, ARHGAP32, SNX18, ARHGAP30, RN3, LAMTOR1, DOCK2, CALM1, SIPA1, RAPGEF3                                                                                                                                                                                           | 26 / 565                                           | 1.4             | 9.2E-02 |
| GO:0006915 | apoptotic process                                                                                       | PPP1R13B, ITGB2, AP1F, CB1, ARRB1, RNF216, WDR92, RASSF5, RAD21, RNF130, SNCA, MAP2K6, TIGAR, AREL1, STAT1, SIAH3, AXIN1, DHCR24, ZDHHC16, PML, NISCH, TRAF3, IRF1, SGK1, BIRC3, MCM2                                                                                                                                                                                                        | 26 / 567                                           | 1.4             | 9.2E-02 |

|            |                                                                              |                                      |      |      |         |
|------------|------------------------------------------------------------------------------|--------------------------------------|------|------|---------|
| GO:0042472 | inner ear morphogenesis                                                      | BCR, PRRX1, CHD7, OTX1, SOBP         | 5/52 | 2.9  | 9.4E-02 |
| GO:0032890 | regulation of protein localization                                           | TBC1D1, MAPK8, MMD, JAK1, B9D1       | 5/52 | 2.9  | 9.4E-02 |
| GO:0002931 | response to ischemia                                                         | TGSR, RNS, CEB1, MAP2K6              | 4/33 | 3.6  | 9.6E-02 |
| GO:2000116 | regulation of cysteine-type endopeptidase activity                           | PSMB9, BIRC3                         | 2/3  | 20.0 | 9.7E-02 |
| GO:1903204 | negative regulation of oxidative stress-induced neuron death                 | PINK1, ATF4                          | 2/3  | 20.0 | 9.7E-02 |
| GO:1903202 | negative regulation of oxidative stress-induced cell death                   | PINK1, PARK2                         | 2/3  | 20.0 | 9.7E-02 |
| GO:1903407 | regulation of cellular response to oxidative stress                          | PINK1, PARK2                         | 2/3  | 20.0 | 9.7E-02 |
| GO:1903298 | negative regulation of hypoxia-induced intrinsic apoptotic signaling pathway | PINK1, TM6IM6                        | 2/3  | 20.0 | 9.7E-02 |
| GO:1901525 | negative regulation of macromitophagy                                        | TGSR, RNF41                          | 2/3  | 20.0 | 9.7E-02 |
| GO:1902993 | regulation of synaptic vesicle transport                                     | PINK1, PARK2                         | 2/3  | 20.0 | 9.7E-02 |
| GO:0051642 | centrosome localization                                                      | NN, ASUN, SYNE2                      | 3/16 | 5.6  | 9.8E-02 |
| GO:0035269 | protein O-linked mannosylation                                               | DPM2, B4GAT1, ISPD                   | 3/16 | 5.6  | 9.8E-02 |
| GO:0031396 | regulation of protein ubiquitination                                         | PINK1, UBQLN1, PARK2                 | 3/16 | 5.6  | 9.8E-02 |
| GO:0045727 | positive regulation of translation                                           | PINK1, SERP1, DDX39B, FAM129A, RBMS3 | 5/53 | 2.8  | 9.9E-02 |

**Supplementary table 10.** Gene ontology analysis of correlated genes to fasting glucose levels. The lines colored in green are listed in the text.

| GO-term    | Pathway                                                                            | Gene symbol                                                                                                                 | Number of genes /<br>total number of<br>genes in pathway | Fold enrichment | P-value |
|------------|------------------------------------------------------------------------------------|-----------------------------------------------------------------------------------------------------------------------------|----------------------------------------------------------|-----------------|---------|
| GO:0007605 | sensory perception of sound                                                        | <i>TBX1, MARVELD2, GJB3, HOMER2, MYO3A, PCDH15, SLC26A4, OTOR, POU3F4</i>                                                   | 9 / 133                                                  | 4.26            | 1.3E-03 |
| GO:0071395 | cellular response to jasmonic acid stimulus                                        | <i>AKR1C1, AKR1C3, AKR1C4</i>                                                                                               | 3 / 4                                                    | 47.17           | 1.5E-03 |
| GO:2000463 | positive regulation of excitatory postsynaptic potential                           | <i>STX1B, NLGN1, NRXN1, PRKCZ</i>                                                                                           | 4 / 20                                                   | 12.58           | 3.7E-03 |
| GO:0044597 | daunorubicin metabolic process                                                     | <i>AKR1C1, AKR1C3, AKR1C4</i>                                                                                               | 3 / 8                                                    | 23.58           | 6.6E-03 |
| GO:0044598 | doxorubicin metabolic process                                                      | <i>AKR1C1, AKR1C3, AKR1C4</i>                                                                                               | 3 / 8                                                    | 23.58           | 6.6E-03 |
| GO:0016338 | calcium-independent cell-cell adhesion via plasma membrane cell-adhesion molecules | <i>CLDN22, CLDN20, CLDN14</i>                                                                                               | 3 / 21                                                   | 8.98            | 4.3E-02 |
| GO:0007010 | cytoskeleton organization                                                          | <i>FGD3, ABLIM1, ZMYM3, MAST4, MAST1, C21ORF2, KRT6B</i>                                                                    | 7 / 161                                                  | 2.73            | 4.3E-02 |
| GO:0097091 | synaptic vesicle clustering                                                        | <i>NLGN1, NRXN1</i>                                                                                                         | 2 / 3                                                    | 41.93           | 4.7E-02 |
| GO:0055114 | oxidation-reduction process                                                        | <i>BCKDHA, GPX2, MAOB, HGD, AKR1C1, AKR1C3, MOXD2P, AKR1C4, DHRSX, CYP11B2, IYD, HSD17B2, RDH16, PYROXD2, TXNDC8, PRODH</i> | 16 / 592                                                 | 1.70            | 5.0E-02 |
| GO:0051260 | protein homooligomerization                                                        | <i>P2RX6, NLGN1, SLC22A6, KCNC1, AKR1C1, DERL1, KCTD16</i>                                                                  | 7 / 177                                                  | 2.49            | 6.3E-02 |
| GO:0015721 | bile acid and bile salt transport                                                  | <i>AKR1C1, AKR1C4, ABCB11</i>                                                                                               | 3 / 27                                                   | 6.99            | 6.8E-02 |
| GO:0050434 | positive regulation of viral transcription                                         | <i>CTDP1, POLR2F, TMEM229A</i>                                                                                              | 3 / 29                                                   | 6.51            | 7.7E-02 |
| GO:0097114 | NMDA glutamate receptor clustering                                                 | <i>NLGN1, NRXN1</i>                                                                                                         | 2 / 5                                                    | 25.16           | 7.7E-02 |
| GO:0031427 | response to methotrexate                                                           | <i>SLC22A6, ABCC2</i>                                                                                                       | 2 / 5                                                    | 25.16           | 7.7E-02 |
| GO:0030321 | transepithelial chloride transport                                                 | <i>SLC26A6, BEST1</i>                                                                                                       | 2 / 5                                                    | 25.16           | 7.7E-02 |
| GO:0097104 | postsynaptic membrane assembly                                                     | <i>NLGN1, NRXN1</i>                                                                                                         | 2 / 6                                                    | 20.96           | 9.1E-02 |
| GO:0097119 | postsynaptic density protein 95 clustering                                         | <i>NLGN1, NRXN1</i>                                                                                                         | 2 / 6                                                    | 20.96           | 9.1E-02 |
| GO:0023041 | neuronal signal transduction                                                       | <i>NLGN1, NRXN1</i>                                                                                                         | 2 / 6                                                    | 20.96           | 9.1E-02 |
| GO:2001054 | negative regulation of mesenchymal cell apoptotic process                          | <i>TBX1, POU3F4</i>                                                                                                         | 2 / 6                                                    | 20.96           | 9.1E-02 |
| GO:0009749 | response to glucose                                                                | <i>ACVR1C, UCN3, ILDR2, KHK</i>                                                                                             | 4 / 68                                                   | 3.70            | 9.3E-02 |



Suppl. Figure 1. Time course of changes in muscle lipid intermediates.

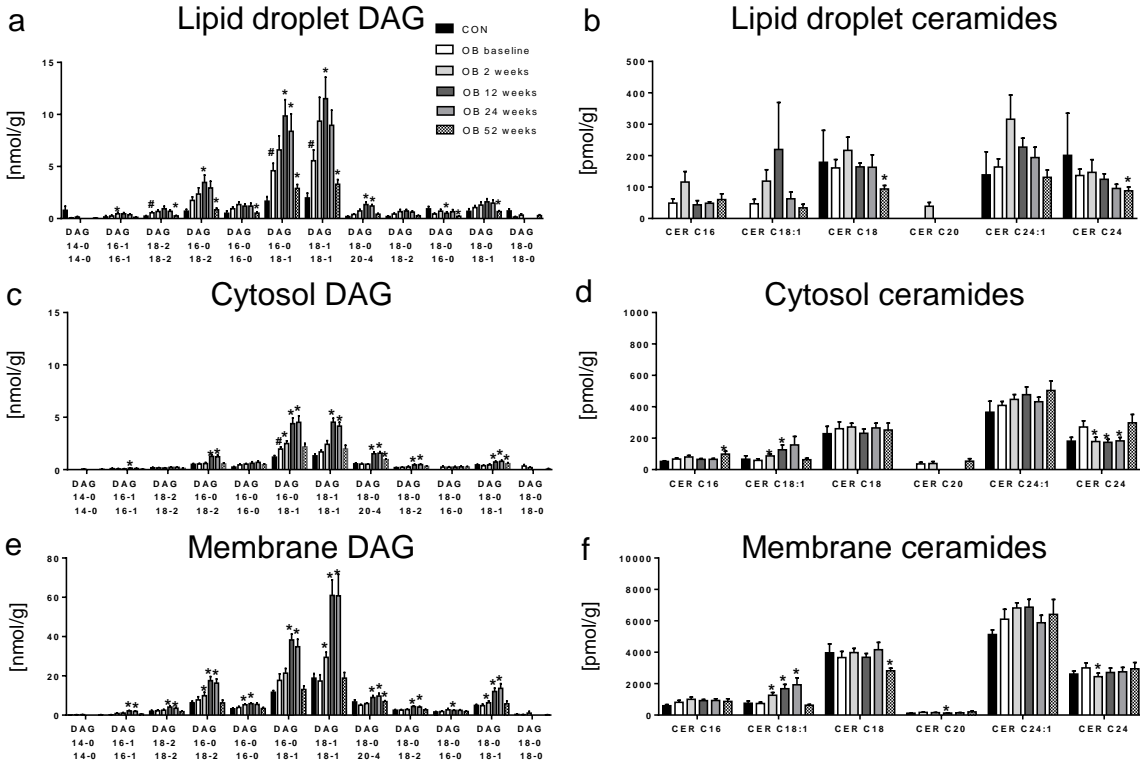

Diacylglycerol (DAG) concentrations in lipid droplet (a), cytosolic (c) and membrane (e) fractions. Ceramide concentrations in lipid droplet (b), cytosolic (d) and membrane (f) fractions. Mean±SEM, \*p<0.05 vs OB at baseline using covariance pattern model for repeated measures analysis, #p<0.05 vs CON using unpaired 2-tailed t-test. CON-nonobese humans, OB-obese humans.

**Suppl. Figure 2. Time course of changes in muscle mitochondrial electron transport chain complexes.**

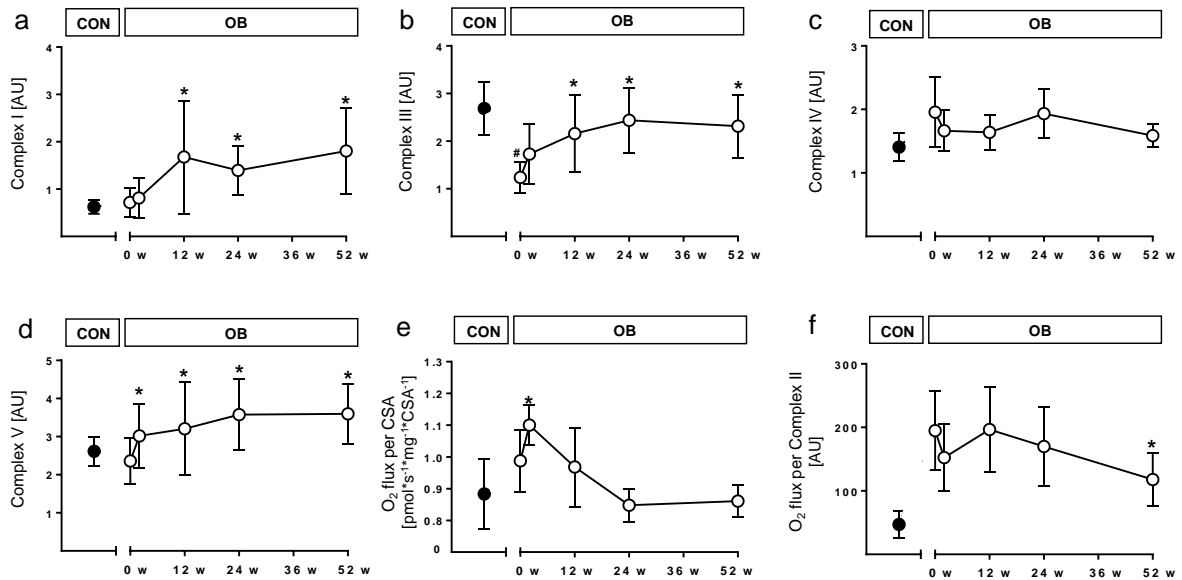

Complex I (NADH:ubiquinone oxidoreductase subunit B8) (a), complex III (ubiquinol-cytochrome C reductase core protein 2) (b), complex IV (cytochrome c oxidase subunit IV) (c), complex V (ATP synthase F1 subunit alpha) (d), maximum mitochondrial respiration per citrate synthase activity (CSA) (e) and maximum mitochondrial respiration per complex II content (f) in obese (empty circles) and in nonobese humans at baseline (black circles). Mean±SEM, \*p<0.05 vs OB at baseline using covariance pattern model for repeated measures analysis, #p<0.05 vs CON using unpaired 2-tailed t-test. CON-nonobese humans, OB-obese humans.

**Suppl. Figure 3. Time course of changes in muscle protein content of mitochondrial fusion and fission markers.**

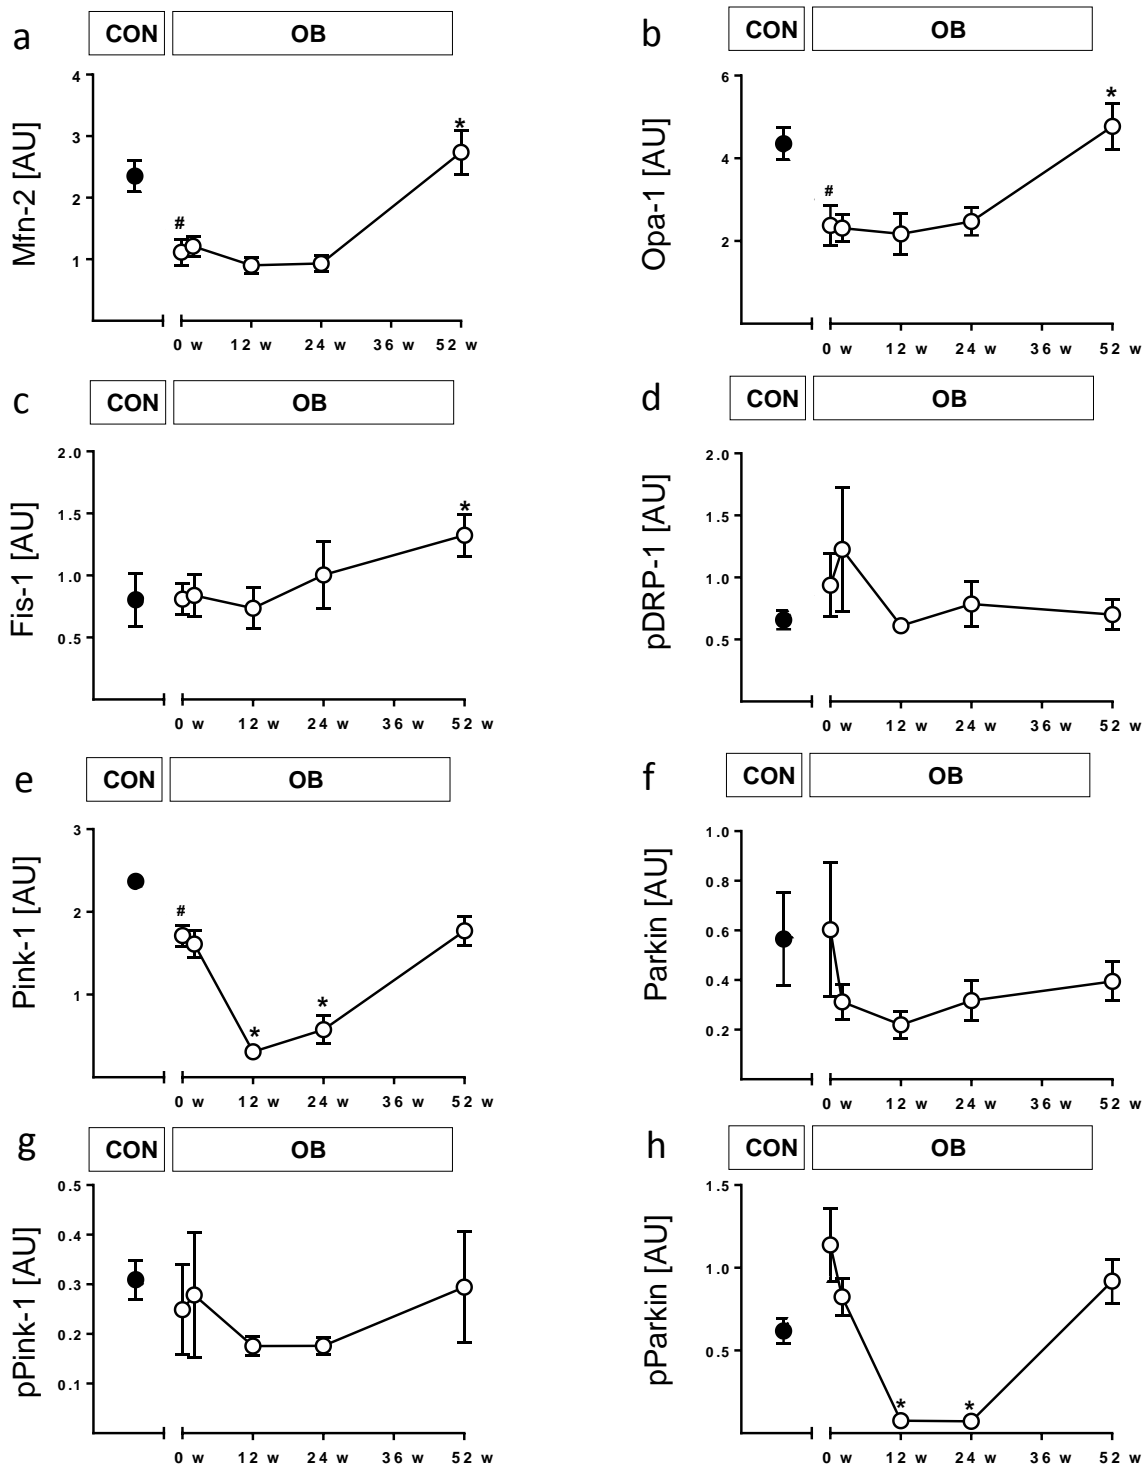

Mitofusin-2 (Mfn-2) (a), optic atrophy 1 protein (Opa-1) (b), mitochondrial fission 1 protein (Fis-1) (c), phospho-Ser<sup>616</sup>-DRP1 (d), Pink-1 (e), Parkin (f), phospho-Thr<sup>257</sup>-Pink1 (g) and phospho-Ser<sup>65</sup>-Parkin (h) in obese (empty circles) and in nonobese humans at baseline (black circles).

Mean±SEM, \*p<0.05 vs OB at baseline, using covariance pattern model for repeated measures analysis, #p<0.05 vs CON using unpaired 2-tailed t-test. CON-nonobese humans, OB-obese humans.

Suppl. Figure 4 Mitochondrial volume density from electron microscopy analysis.

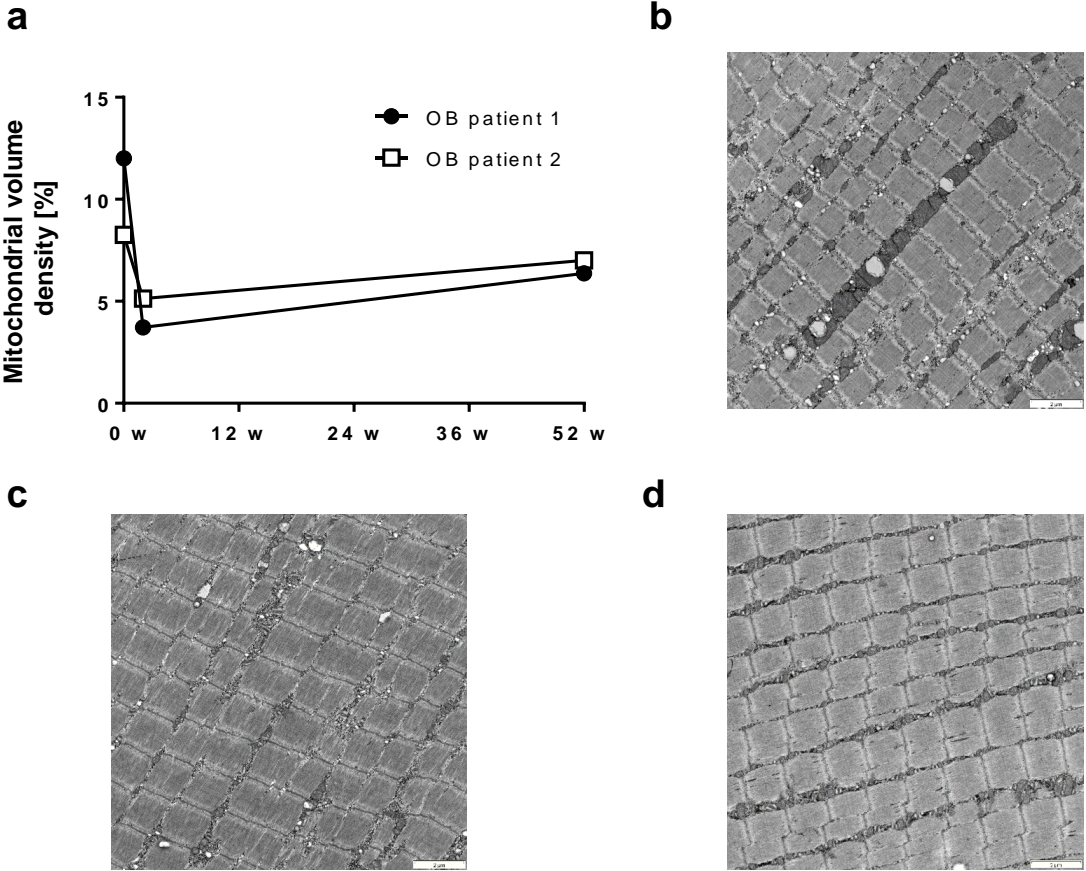

Data from two obese patients (a) and representative micrographs from baseline (b), 2 weeks (c) and 52 weeks (d) after metabolic surgery. Empty squares – obese patient Nr.1, black circles – obese patient Nr. 2. OB-obese humans.

**a**

Gene ontology analysis: OB (0 w) vs. (2 w)  
(Transiently altered genes)

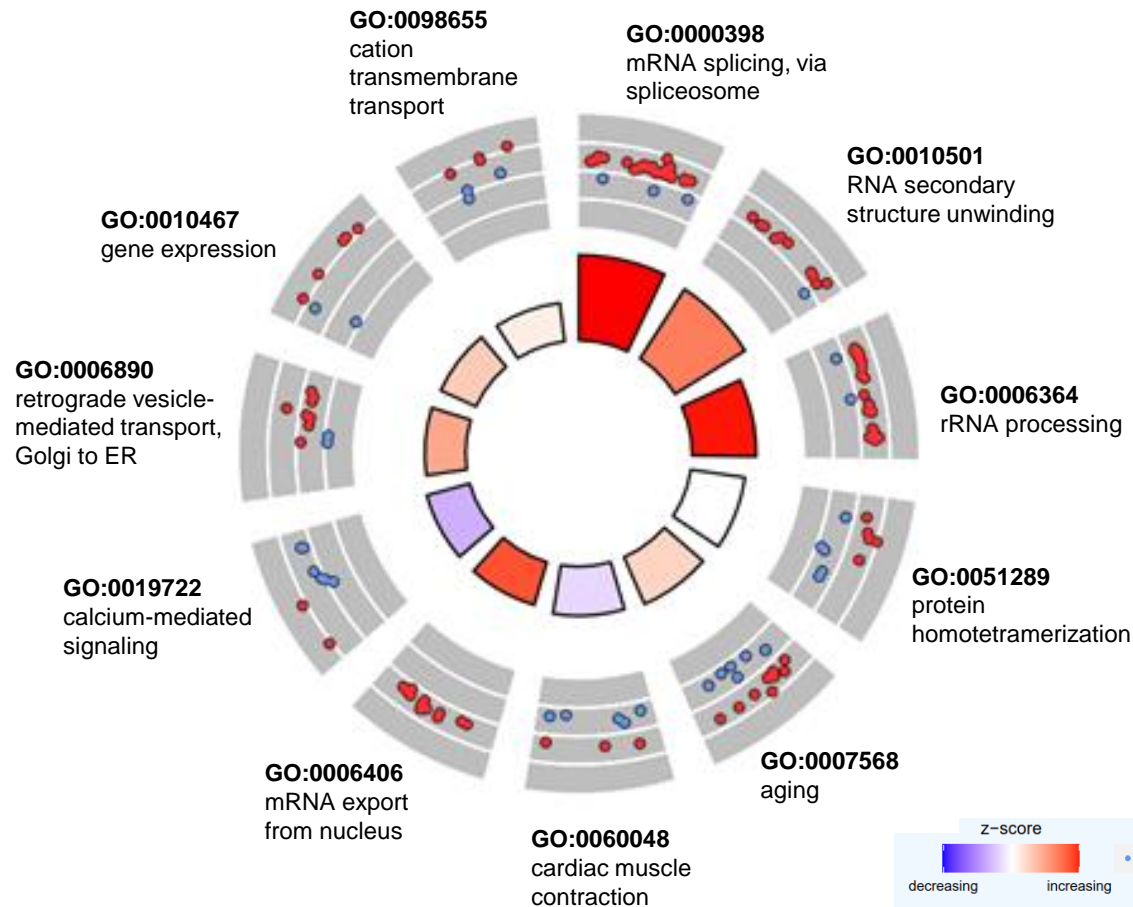**b**

Gene ontology analysis: OB (0 w) vs. (12 w)

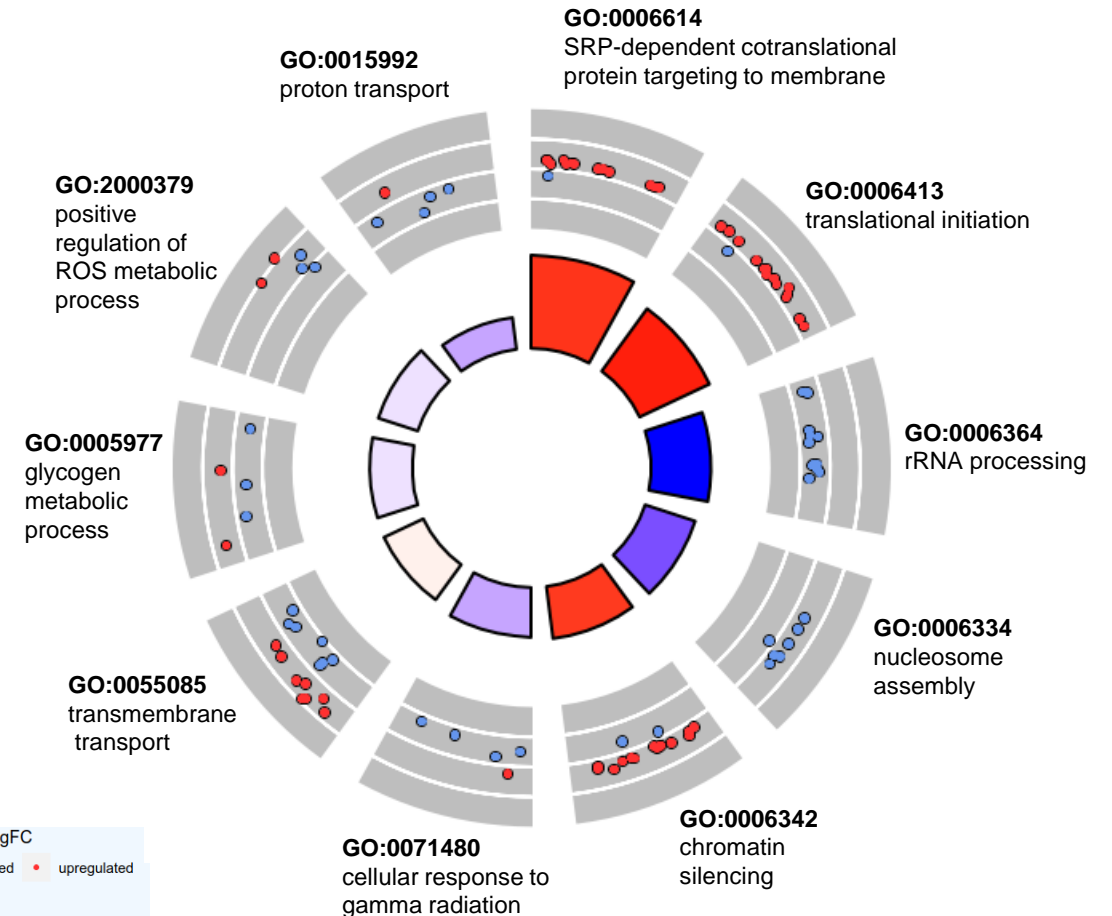

**Suppl. Figure 5. Gene ontology analysis of transiently altered at 2 w (a) and transcripts altered at 12 w (b).** The inner circle depicts the main processes to be increased (blue) or decreased (red) in obese participants transiently at 2 weeks (a) and 12 weeks (b). The outer circle shows scaled scatter plots for affected genes and their regulation within the most-enriched biological pathway.

**Suppl. Figure 6. Alterations in skeletal muscle DNA methylation at 2 and 52 weeks after metabolic surgery.**

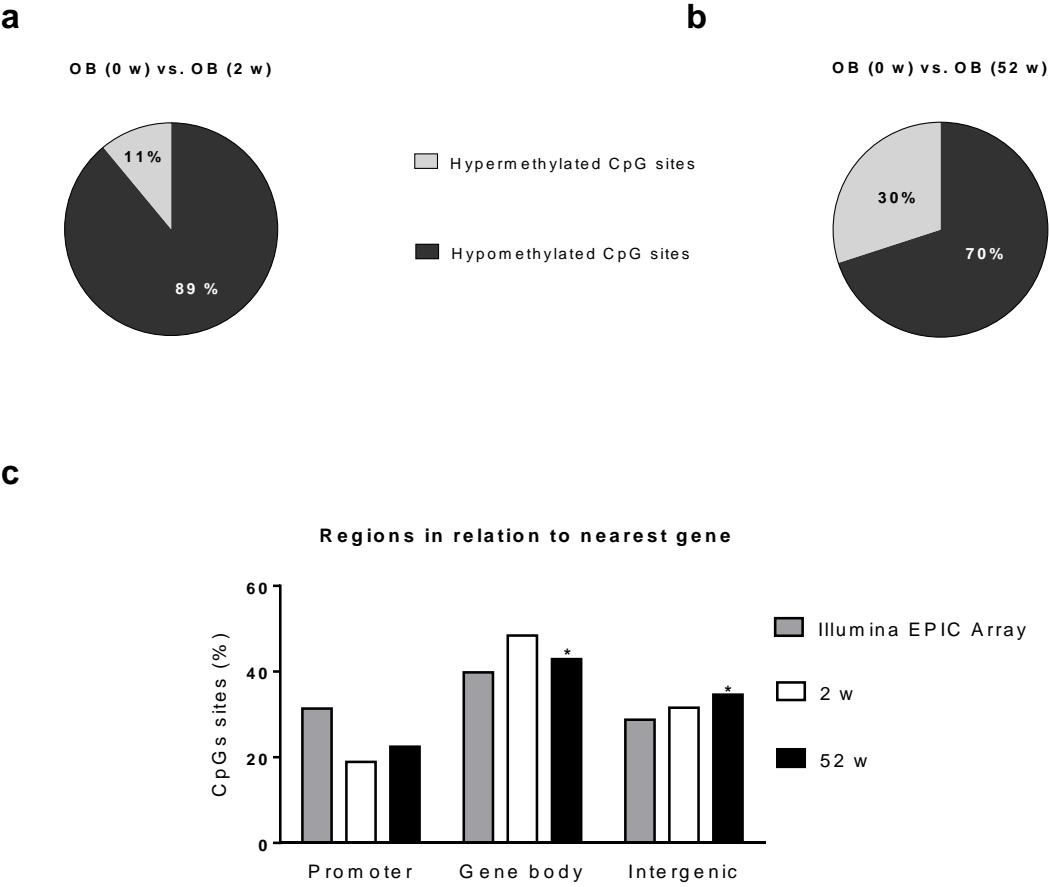

The pie charts show the percentage of individual CpG sites exhibiting significantly increased (bright grey) and decreased (dark grey) methylation at baseline vs. 2 weeks (a) and vs. 52 weeks (b). Localization of differentially methylated CpGs in relation to-the nearest gene region (c). Chi-square analysis was performed to test over- or under-representation of sequence features among the differentially methylated CpGs vs. all analyzed CpGs.\*p<0.01 (paired t test, n=16), \*p<0.05

DEM:  
Genes exhibiting  
differential expression  
and methylation

5% CH3:  
Genes with at least 5%  
differential methylation at  
52 w

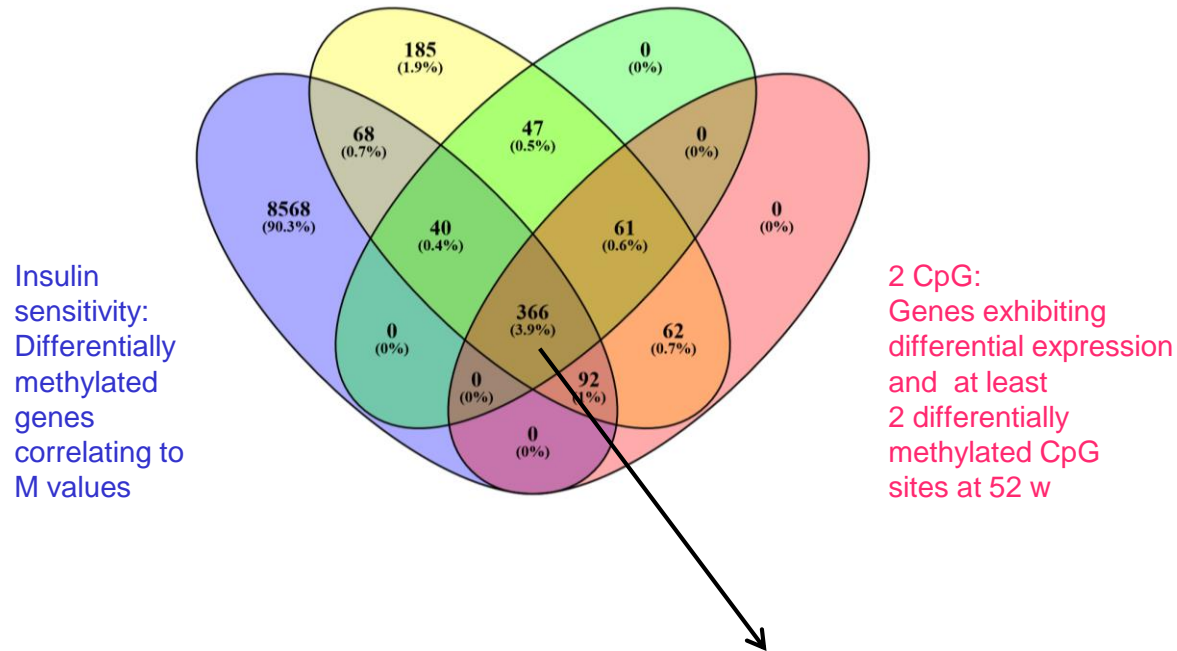

*PIK3R1, HMGCS2, MAPK10, HOMER1, BCL6, EGF, PTPRE, PRKAG2, FBXO32, SGK1, MAPK10, MLXIP, PRKCD, PRKAG2, PIK3R2, PRKCQ, ACACB, TNFRSF1A, PPP2R3A, PHKB, RAP1GAP2, BCR, ARHGDI1B, ARHGAP26, KALRN, SIPA1*

**Suppl. Figure 7.** Venn diagram summarizing the strategy for the identification of novel candidate genes involved in the improvement of the insulin sensitivity after bariatric surgery. For insulin sensitivity Pearson correlation was performed with all individual DNA methylation at 0, 2, and 52 w



**Suppl. Figure 8. Study design.**

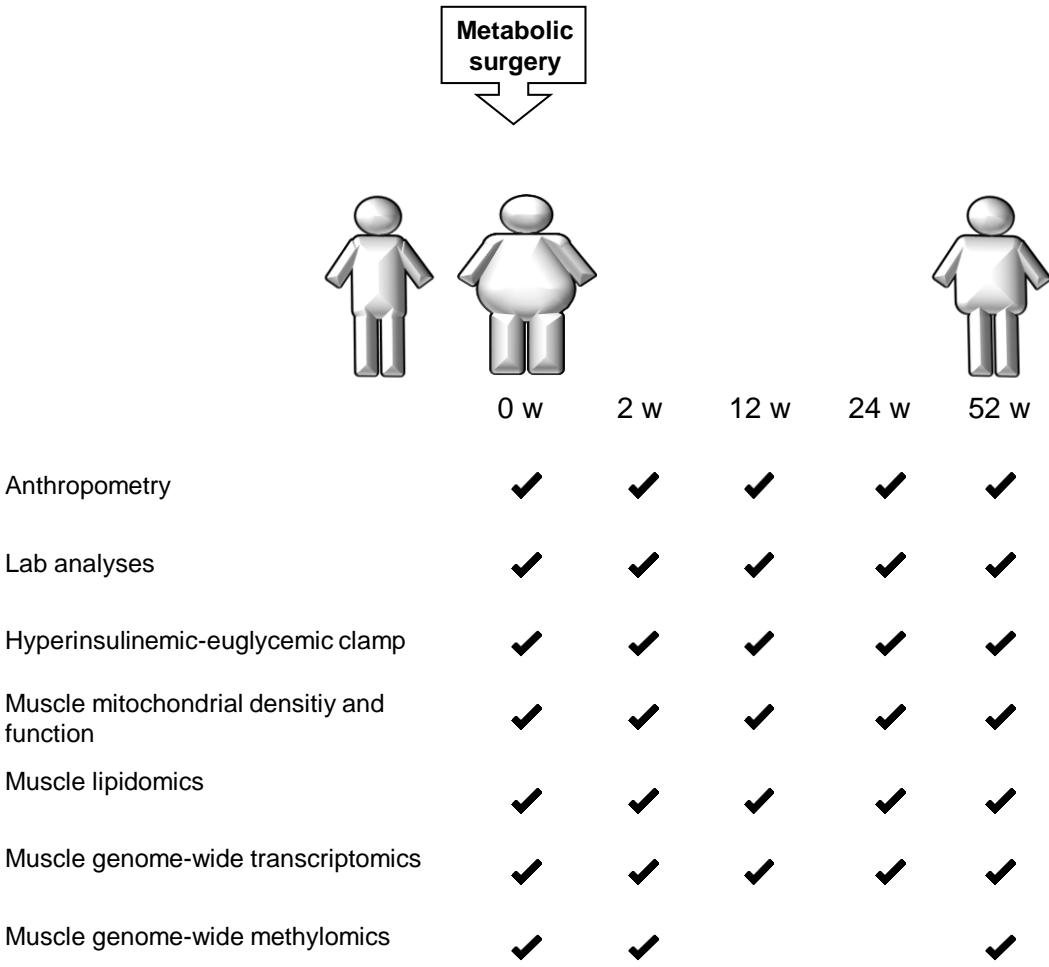

Obese participants (OB) were intensively characterized at 0 (baseline), 2, 12, 24 and 52 weeks after metabolic surgery. Nonobese humans (CON) were studied at baseline.

**Suppl. Figure 9.** Time course of mRNA expression of indicated genes

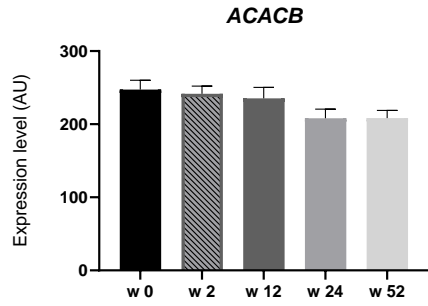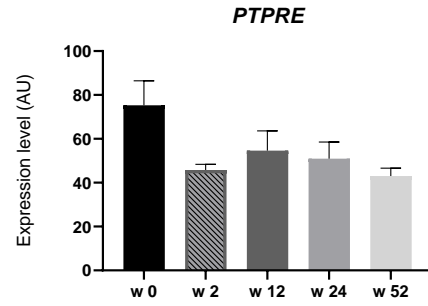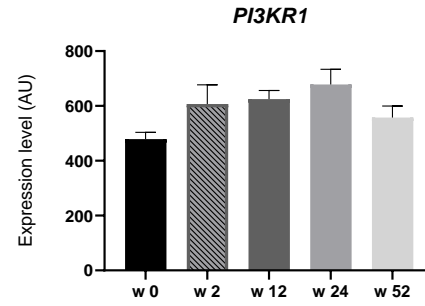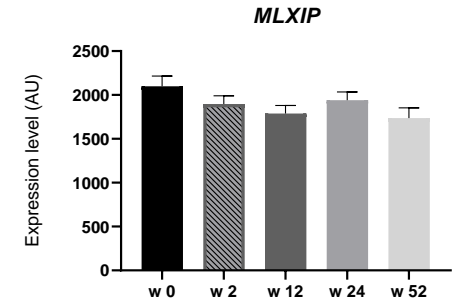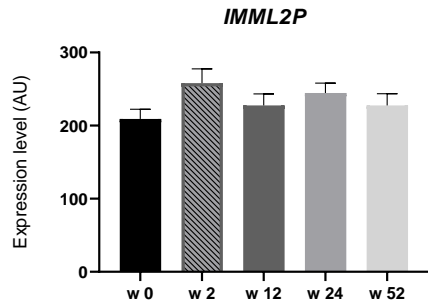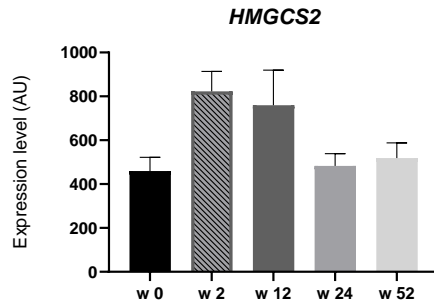

**Suppl. Figure 10.** DNA methylation levels of *PTPRE* and *PIK3R1* are correlated to peripheral insulin M-value.

***PTPRE***

R2 = 0.30196 Adj R2 = 0.28534 P = 0.00011189  
Intercept = 0.43871 Slope = -0.016343

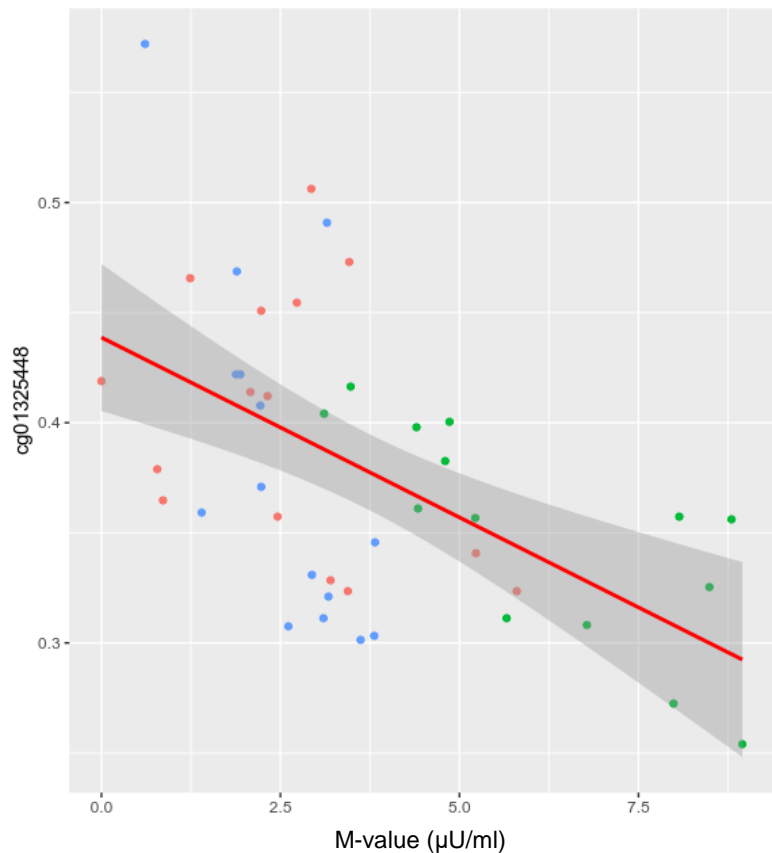

***PIK3R1***

R2 = 0.32826 Adj R2 = 0.31227 P = 4.8137e-05  
Intercept = 0.49079 Slope = -0.017206

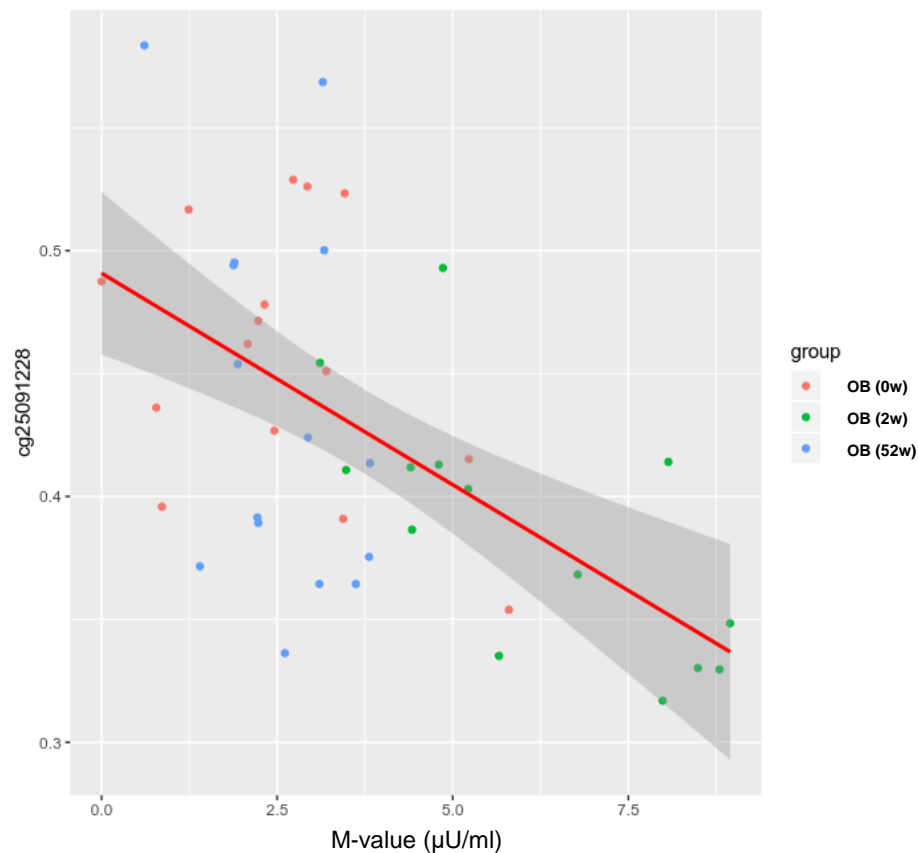

Suppl. Fig. 11. Representative blots for proteins from Western blot analysis

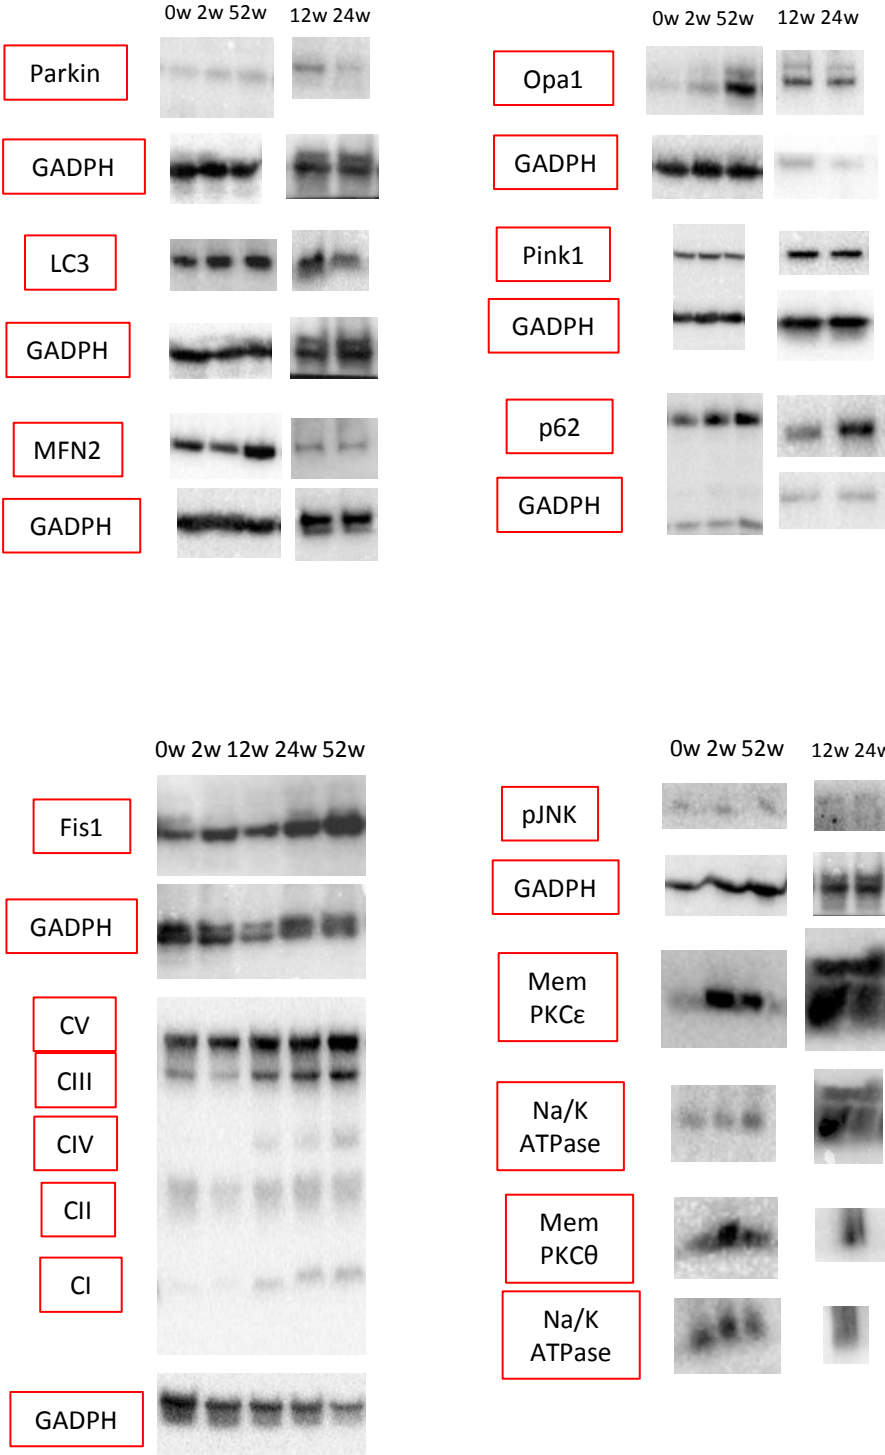

Supplement: 41467_2019_12081_MOESM1_ESM.pdf [file 41467_2019_12081_MOESM1_ESM.pdf]
